# Supplementary material for: Taxonomic Structure and Wing Pattern Evolution in the Parnassius mnemosyne Species Complex (Lepidoptera, Papilionidae)
Source: MDPI journal article supplement (doi:10.3390/insects14120942), 2023-12-12
Supplement: s1 [file s1]

### Supplementary Material S3. Reconstruction of ancestral states

To reconstruct the probabilities of ancestral states, a Bayesian approach was used as implemented in the program MrBayes3.2 (Ronquist et al., 2012) [43]. The states studied were coded as 0 (absence of red spots) and 1 (presence of red spots). These states were implemented into a matrix of molecular features. The probability of ancestral states for each node was calculated separately. The command blocks used to analyze ancestral states are provided below.

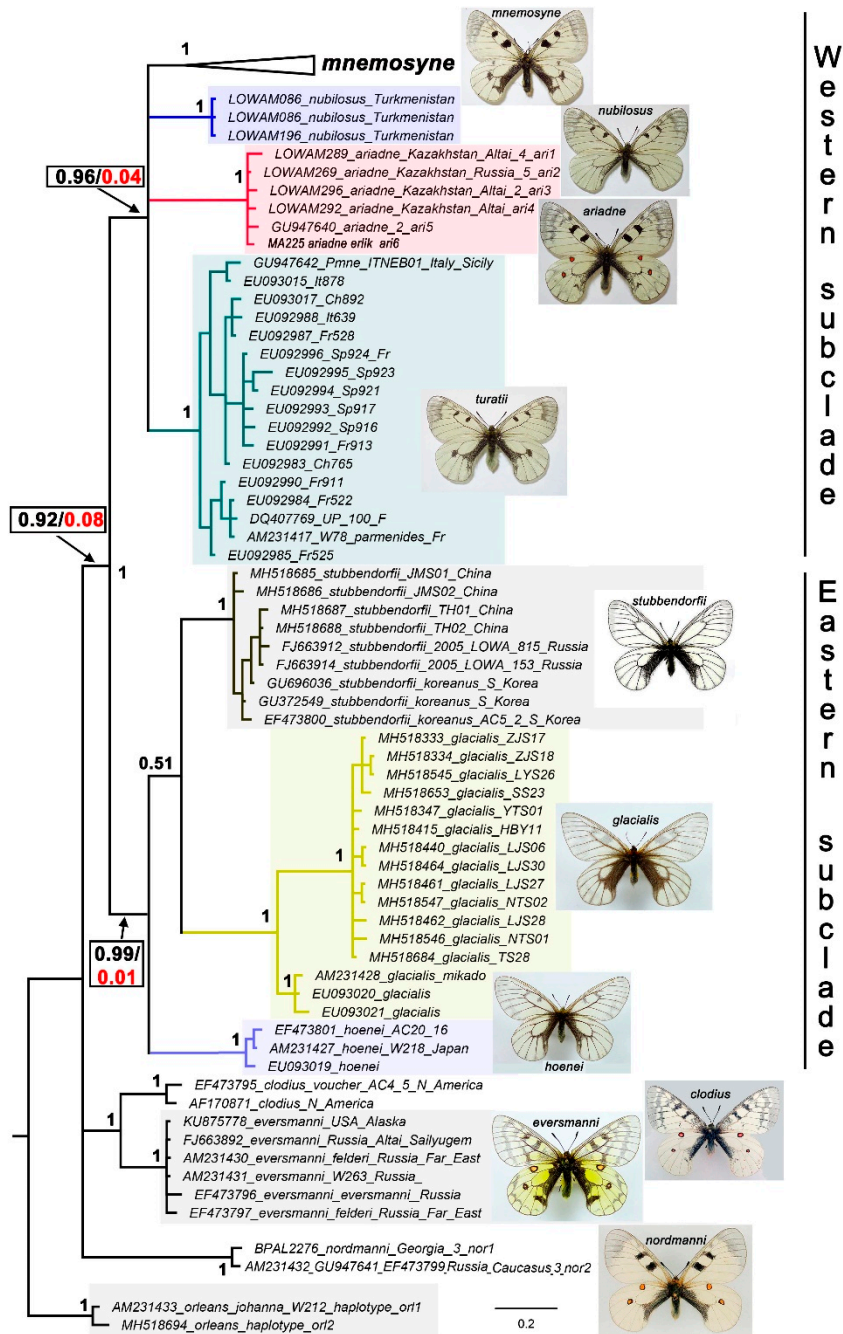

**Figure S1.** The Bayesian tree of the *Parnassius* (*Driopa*) species based on analysis of the mitochondrial COI barcodes. Numbers at nodes indicate Bayesian posterior probabilities (BPP) (higher than 0.5). Black/red values in the rectangles show the probabilities of the ancestral states “absence of red spots”/“presence of red spots” in the clades (1) (*mnemosyne* +*ariadne*) [0.96/0.04], (2) [(*mnemosyne* +*ariadne*)+(*stubbendorffii*+*glacialis*+*hoenei*)] [0.92/0.08] and (3) (*stubbendorffii*+*glacialis*+*hoenei*) [0.99/0.01]

## (1) (*mnemosyne* + *ariadne*) clade

Probability of Ancestral state “no red spots” = 0.96±0.006

| Parameter               | Mean     | Variance  | Lower    | Upper     | Median   | min ESS* | avg ESS | PSRF+ |
|-------------------------|----------|-----------|----------|-----------|----------|----------|---------|-------|
| TL{all}                 | 0.607933 | 0.003481  | 0.495735 | 0.718428  | 0.606854 | 190.49   | 191.39  | 0.999 |
| r{A<->C}{2}             | 0.049545 | 0.000215  | 0.025028 | 0.082874  | 0.048896 | 27.64    | 35.20   | 1.024 |
| r{A<->G}{2}             | 0.224390 | 0.001438  | 0.150871 | 0.297565  | 0.220734 | 22.81    | 35.43   | 1.001 |
| r{A<->T}{2}             | 0.039736 | 0.000063  | 0.025280 | 0.054317  | 0.038290 | 32.14    | 88.30   | 1.021 |
| r{C<->G}{2}             | 0.021513 | 0.000225  | 0.000421 | 0.055843  | 0.017037 | 31.28    | 38.51   | 1.000 |
| r{C<->T}{2}             | 0.644407 | 0.001830  | 0.561129 | 0.716927  | 0.646872 | 40.90    | 42.78   | 0.999 |
| r{G<->T}{2}             | 0.020410 | 0.000074  | 0.006173 | 0.036979  | 0.018717 | 43.86    | 64.22   | 1.000 |
| pi{A}{2}                | 0.302963 | 0.000283  | 0.269135 | 0.334567  | 0.304003 | 46.39    | 94.62   | 1.000 |
| pi{C}{2}                | 0.143621 | 0.000147  | 0.120124 | 0.167774  | 0.142642 | 59.51    | 66.54   | 1.020 |
| pi{G}{2}                | 0.142983 | 0.000151  | 0.117416 | 0.164763  | 0.142850 | 104.59   | 142.86  | 1.002 |
| pi{T}{2}                | 0.410433 | 0.000311  | 0.375599 | 0.443693  | 0.409026 | 99.23    | 113.17  | 1.007 |
| alpha{2}                | 0.560108 | 0.065787  | 0.218632 | 1.068296  | 0.493593 | 30.88    | 46.96   | 0.999 |
| pinvar{2}               | 0.493192 | 0.008850  | 0.324925 | 0.677312  | 0.503376 | 30.00    | 37.69   | 1.000 |
| m{1}                    | 4.982152 | 10.976314 | 0.202689 | 11.016320 | 4.349071 | 309.64   | 344.20  | 0.999 |
| m{2}                    | 0.993911 | 0.000026  | 0.984631 | 1.001159  | 0.994880 | 309.64   | 344.20  | 0.999 |
| p{0}{1@mnemosyne_clade} | 0.034947 | 0.006044  | 0.000001 | 0.208347  | 0.005012 | 54.98    | 74.07   | 1.000 |
| p{1}{1@mnemosyne_clade} | 0.965053 | 0.006044  | 0.790442 | 0.999999  | 0.994989 | 54.98    | 74.07   | 1.000 |

\* Convergence diagnostic (ESS = Estimated Sample Size); min and avg values

correspond to minimal and average ESS among runs.

ESS value below 100 may indicate that the parameter is undersampled.

+ Convergence diagnostic (PSRF = Potential Scale Reduction Factor) should approach 1.0 as runs converge.

## (2) [(*mnemosyne* + *ariadne*)+(*stubbendorffii*+*glacialis*+*hoenei*)] clade

Probability of Ancestral state “no red spots” = 0.92±0.019

| Parameter   | Mean     | Variance | Lower    | Upper    | Median   | min ESS* | avg ESS | PSRF+ |
|-------------|----------|----------|----------|----------|----------|----------|---------|-------|
| TL{all}     | 0.598457 | 0.003300 | 0.479592 | 0.710142 | 0.596399 | 166.16   | 200.55  | 1.004 |
| r{A<->C}{2} | 0.050037 | 0.000232 | 0.018536 | 0.076674 | 0.049107 | 34.07    | 43.13   | 0.999 |
| r{A<->G}{2} | 0.223385 | 0.001893 | 0.149845 | 0.312143 | 0.220690 | 16.24    | 16.90   | 1.014 |
| r{A<->T}{2} | 0.039723 | 0.000063 | 0.026157 | 0.055535 | 0.038529 | 62.44    | 63.13   | 1.006 |
| r{C<->G}{2} | 0.024964 | 0.000411 | 0.000883 | 0.063662 | 0.019050 | 20.23    | 27.71   | 1.000 |

|                          |          |           |          |           |          |        |        |       |
|--------------------------|----------|-----------|----------|-----------|----------|--------|--------|-------|
| r(C<->T){2}              | 0.642032 | 0.002280  | 0.541108 | 0.721861  | 0.647017 | 9.97   | 14.31  | 1.010 |
| r(G<->T){2}              | 0.019857 | 0.000066  | 0.006026 | 0.035787  | 0.018642 | 26.37  | 28.19  | 1.009 |
| pi(A){2}                 | 0.305557 | 0.000254  | 0.276933 | 0.340037  | 0.304288 | 60.95  | 71.88  | 1.001 |
| pi(C){2}                 | 0.144041 | 0.000131  | 0.123010 | 0.167293  | 0.144423 | 42.44  | 63.41  | 1.009 |
| pi(G){2}                 | 0.142076 | 0.000174  | 0.120838 | 0.170437  | 0.140927 | 32.97  | 45.58  | 1.012 |
| pi(T){2}                 | 0.408325 | 0.000241  | 0.380908 | 0.438656  | 0.409277 | 54.42  | 67.69  | 1.000 |
| alpha{2}                 | 0.557583 | 0.068148  | 0.180256 | 1.043169  | 0.494943 | 15.36  | 30.35  | 1.003 |
| pinvar{2}                | 0.494900 | 0.009709  | 0.289974 | 0.672539  | 0.509138 | 9.92   | 21.80  | 1.000 |
| m{1}                     | 5.012332 | 12.059038 | 0.081419 | 11.808920 | 4.282275 | 336.75 | 365.77 | 1.001 |
| m{2}                     | 0.993865 | 0.000028  | 0.983473 | 1.001398  | 0.994982 | 336.75 | 365.77 | 1.001 |
| p(0){1@mnemosyne_clade2} | 0.083020 | 0.019270  | 0.000179 | 0.329243  | 0.036804 | 27.93  | 57.45  | 1.016 |
| p(1){1@mnemosyne_clade2} | 0.916980 | 0.019270  | 0.670498 | 0.999782  | 0.963255 | 27.93  | 57.45  | 1.016 |

\* Convergence diagnostic (ESS = Estimated Sample Size); min and avg values

correspond to minimal and average ESS among runs.

ESS value below 100 may indicate that the parameter is undersampled.

+ Convergence diagnostic (PSRF = Potential Scale Reduction Factor) should approach 1.0 as runs converge.

### (3) (*stubbendorfi*+*glacialis*+*hoenei*) clade

Probability of Ancestral state “no red spots” = 0.99±0.001

| Parameter                  | Mean     | Variance  | Lower    | Upper     | Median   | min ESS* | avg ESS | PSRF+ |
|----------------------------|----------|-----------|----------|-----------|----------|----------|---------|-------|
| TL{all}                    | 0.598549 | 0.003270  | 0.491822 | 0.717121  | 0.597192 | 163.85   | 224.87  | 1.008 |
| r(A<->C){2}                | 0.053960 | 0.000229  | 0.023775 | 0.082434  | 0.052604 | 42.20    | 54.83   | 1.012 |
| r(A<->G){2}                | 0.220837 | 0.001467  | 0.156058 | 0.295003  | 0.218292 | 17.32    | 21.17   | 1.003 |
| r(A<->T){2}                | 0.040328 | 0.000064  | 0.023879 | 0.054431  | 0.039781 | 29.30    | 46.62   | 1.010 |
| r(C<->G){2}                | 0.021933 | 0.000258  | 0.000465 | 0.052717  | 0.017961 | 34.18    | 51.02   | 1.001 |
| r(C<->T){2}                | 0.642171 | 0.001755  | 0.552173 | 0.712290  | 0.641969 | 15.14    | 20.93   | 1.001 |
| r(G<->T){2}                | 0.020771 | 0.000066  | 0.008143 | 0.034832  | 0.019767 | 63.47    | 66.40   | 1.000 |
| pi(A){2}                   | 0.304876 | 0.000285  | 0.269047 | 0.333987  | 0.304741 | 65.52    | 71.73   | 1.012 |
| pi(C){2}                   | 0.145445 | 0.000170  | 0.121690 | 0.169303  | 0.145278 | 63.99    | 66.19   | 1.008 |
| pi(G){2}                   | 0.142943 | 0.000176  | 0.117862 | 0.169670  | 0.142629 | 44.25    | 56.49   | 0.999 |
| pi(T){2}                   | 0.406736 | 0.000316  | 0.373710 | 0.442883  | 0.406925 | 60.22    | 74.09   | 1.001 |
| alpha{2}                   | 0.684629 | 0.094181  | 0.259595 | 1.354860  | 0.618408 | 22.32    | 32.77   | 1.081 |
| pinvar{2}                  | 0.532285 | 0.007768  | 0.373668 | 0.703313  | 0.545572 | 21.92    | 26.78   | 1.080 |
| m{1}                       | 4.929505 | 10.673132 | 0.572707 | 11.403790 | 4.290773 | 367.20   | 371.67  | 1.001 |
| m{2}                       | 0.993992 | 0.000025  | 0.984092 | 1.000653  | 0.994972 | 367.20   | 371.67  | 1.001 |
| p(0){1@stubbendorfi_clade} | 0.006969 | 0.000148  | 0.000001 | 0.028064  | 0.002567 | 110.77   | 143.72  | 1.000 |

p(1){1@stubbendorffii\_clade} 0.993031 0.000148 0.971818 0.999999 0.997446 110.77 143.72 1.000

\* Convergence diagnostic (ESS = Estimated Sample Size); min and avg values

correspond to minimal and average ESS among runs.

ESS value below 100 may indicate that the parameter is undersampled.

+ Convergence diagnostic (PSRF = Potential Scale Reduction Factor) should approach 1.0 as runs converge.

## Alignment and command block for reconstruction of the ancestral states in the clade (1) (*mnemosyne* +*ariadne*)

#NEXUS

```
BEGIN DATA;
  DIMENSIONS NTAX=125 NCHAR=655;
  format datatype=mixed(standard:1,DNA:2-655) interleave=yes gap=- missing=?;
  MATRIX
Parnassius_orleans_AC10_5 0
LOWAM001_Kyrgyzstan_Alai_10 1
LOWAM004_Uzbekistan_Gissar_38 1
LOWAM007_Kyrgyzstan_TianShan24 1
LOWAM009_Kyrgyzstan_TianShan_6 1
LOWAM013_Turkey_Georgia_3 1
LOWAM014_Turkey_Ovitdagi_1 1
LOWAM015_Don_Borisovka_Saratov 1
LOWAM018_Kyrgyzstan_Karamyk 1
LOWAM019_Kyrgyzstan_Karamyk 1
LOWAM021_Russia_Saratov 1
LOWAM023_Saratov_Luga_Vologda_4 1
LOWAM027_Kazakhstan_Karatau_2 1
LOWAM037_Russia_Pskovskaya 1
LOWAM038_Kyrgyzstan_Tjuz_Ashu_3 1
LOWAM039_Kyrgyzstan_23 1
LOWAM044_Russia_Borisovra_3 1
LOWAM045_Tajikistan_Shakhristan_3 1
LOWAM067_Kazakhstan_Kaindy_1 1
LOWAM069_Russia_Teberda_2 1
LOWAM073_Kyrgyzstan_Takhtalyk1 1
LOWAM074_Kyrgyzstan_Naryntoo 1
LOWAM086_Turkmenistan_3 1
LOWAM087_Uzbekistan_Sarchashma 1
LOWAM095_Kyrgyzstan_Sosnovka 1
LOWAM096_Gissar_5 1
LOWAM098_Tajikistan_Khondizal 1
LOWAM099_Uzbekistan_Kamchik_2 1
LOWAM100_Kyrgyzstan_Konduk 1
LOWAM115_Azerbaijan_Nyus_Nyus 1
LOWAM116_Iran_Dizin_2 1
LOWAM122_Russia_Saratow_1 1
LOWAM136_Uzbekistan_Tamshush_1 1
LOWAM149_Kyrgyzstan_Songkel_1 1
LOWAM198_Turkey_Aladaglar_2 1
LOWAM213_Tajikistan_Tandukul_1 1
Parnassius_clodius 0
Parnassius_eversmanni_2005_LOWA_108 0
Parnassius_eversmanni_2005_LOWA_107 0
Parnassius_stubbendorffii_2005_LOWA_815 1
Parnassius_stubbendorffii_2005_LOWA_154 1
Parnassius_stubbendorffii_2005_LOWA_153 1
Parnassius_nordmanni 0
Parnassius_eversmanni 0
Parnassius_eversmanni_felderi 0
Parnassius_ariadne_ariadne 0
Parnassius_glacialis_mikado 1
Parnassius_stubbendorffii_hoenei 1
Parnassius_stubbendorffii_hoenei_AC20_16 1
Parnassius_stubbendorffii_koreanus 1
Parnassius_nordmanni_AC20_5 0
Parnassius_eversmanni_felderi_AC23_68 0
Parnassius_eversmanni_eversmanni_AC1_14 0
```

|                                             |   |
|---------------------------------------------|---|
| Parnassius_clodius_AC4_5                    | 0 |
| Parnassius_ariadne_AC4_14                   | 0 |
| HQ004911_RV_07_C107_Romania                 | 1 |
| HQ004908_RV_07_D060_Romania                 | 1 |
| HQ004907_RV_08_M274_Romania                 | 1 |
| HQ004902_RV_08_M361_Romania                 | 1 |
| GU947642_Pmne_ITNEB01_Italy_Sicily          | 1 |
| EU093018_Ca995                              | 1 |
| EU093017_Ch892                              | 1 |
| EU093016_Tk889                              | 1 |
| EU093015_It878                              | 1 |
| EU093014_Hu875                              | 1 |
| EU093013_Sk872_Cz_Slova                     | 1 |
| EU093011_Cz869                              | 1 |
| EU093010_Ru_Bosnia_Fi_Bu_Hu_Bel_Po_Rom_Ukr_ | 1 |
| EU093009_Kz848                              | 1 |
| EU093007_Fi810                              | 1 |
| EU093004_Tu999                              | 1 |
| EU093000_Bu961                              | 1 |
| EU092998_Bu951                              | 1 |
| EU092997_Ru940                              | 1 |
| EU092996_Sp924_Fr                           | 1 |
| EU092995_Sp923                              | 1 |
| EU092994_Sp921                              | 1 |
| EU092993_Sp917                              | 1 |
| EU092992_Sp916                              | 1 |
| EU092991_Fr913                              | 1 |
| EU092990_Fr911                              | 1 |
| EU092988_It639                              | 1 |
| EU092987_Fr528                              | 1 |
| EU092985_Fr525                              | 1 |
| EU092984_Fr522                              | 1 |
| EU092983_Ch765                              | 1 |
| EU092982_Pl653_Slova_Ukr                    | 1 |
| EU092981_At626                              | 1 |
| EU092980_At622                              | 1 |
| EU092978_At618_At_Slo                       | 1 |
| EU092977_At606_At_Cz_D_Fi_Hu_Po_Slova       | 1 |
| EU092976_At602                              | 1 |
| EU092975_D757                               | 1 |
| EU092974_D756                               | 1 |
| EU092973_D744                               | 1 |
| EU092971_Hu697_Bu_Hu                        | 1 |
| EU092969_Bu775                              | 1 |
| EU092968_Bu772                              | 1 |
| EU093003_D982                               | 1 |
| DQ407769_UP_100_F                           | 1 |
| AM231426_W336_parvisi_Gre                   | 1 |
| AM231425_W333_angorae_Tur                   | 1 |
| AM231424_W331_angorae_Tur_Ankara            | 1 |
| AM231423_W329_gigantea_Uzb_Chatkal          | 1 |
| AM231422_W330_orientalis_Zailiyskiy         | 1 |
| AM231421_W292_ochracea_Tadj_Zeravsh_        | 1 |
| AM231420_W280_farsica_Iran_Fars             | 1 |
| AM231419_W311_pseudonubilosus_Iran_Urmia    | 1 |
| AM231418_W335_sheljuzhkoi_Tur_Adana         | 1 |
| AM231417_W78_parmenides_Fr                  | 1 |
| EU836682_h_1_32_Rus                         | 1 |
| EU836681_h_1_31_Rus                         | 1 |
| EU836680_A_Bo_Bu_Cr_Cz_Hu_Sl_Li_Fi_Po_Ru    | 1 |
| EU836675_h_1_19_It                          | 1 |
| EU836674_h_1_18_At_It                       | 1 |
| EU836672_h_1_10_It                          | 1 |
| EU836671_h_1_09_It                          | 1 |
| EU836670_h_1_07_Gre                         | 1 |
| EU836669_h_1_06_Gre                         | 1 |
| EU836668_h_1_05_Gre                         | 1 |
| EU836667_h_1_04_Gre                         | 1 |
| EU836666_h_1_03_Mac                         | 1 |
| EU836665_h_1_02_Gre_Mac                     | 1 |
| EU836664_h_2_06_At_It                       | 1 |
| EU836663_h_2_05_It                          | 1 |

Parnassius\_orleans\_AC10\_5 -----  
 TGAGCAGGTATAATAGGAACCTCTTTAAGATTATTAATTCGTACTGAATTAGGTAATCCTGGATCTTTAATTGGAGATGATCAAATTTATAACACTA  
 TTGTAACAGCTCATGCTTTTATTATAATTTTTTTTATAGTTATACCAATTATAATTTGGAGGATTTGGAAATTGATTAAATCCATTAAATATTAGGAGC  
 CCCAGATATAGCTTTCCCCGAATAAATAATATAAGATTTTGACTATTACCCCCCTCATTAACTTATTAATTTCCAGAAGAATCGTAGAAAATGGA  
 GCAGGAACGTGGATGAACAGTTTATCCCCCTTTATCCTCTAATATTGCCCATAGTGAAGATCAGTTGATTAGCTATCTTTTCTTTACATTTAGCTG  
 GAATTTTCATCTATTTTAGGAGCTATTAATTTTATTACAACATTTATTAATATACGAATTAATCATATATCATTTGATCAAATACCCCTTTTCGTATG





TCTAGAATAAATTGTAGAAAAATGGAGCAGGAACAGGATGAACAGT'TTATCCCCCTTTATCATCTAATATCGCTCATAGAGGTAGTTCAGTTGATTTAG  
CTATTTTTTCTTTACATTTAGCGGGAATTTCAATCAATCTTAGGAGCTATTAAATTTTATTACAACATATTATTAATATACGAATTAATCATATATCATT  
TGATCAAATACCTCTCTTTGTATGAGCAGTAGGAATTACTGCTTTACTTTTATTACTATCTTTACCTGTATTAGCTGGTGCATTACTATATTATTA  
ACAGATCGAAATCTTAATACTTCATTTTTTGTATCCTGCAGGAGGTGGAGATCCTATTTTATATCAACATTTA

LOWAM069\_Russia\_Teberda\_2 -----  
TTTATTTTTGGTATTTGAGCAGGTATAGTAGGAACCTCTTTAAGATTATTAATTCGTACTGAATTAGGTAATCCTGGATCTTTAATTGGAGATGATC  
AAATTTATAATACTATTGTAACAGCTCATGCTTTTATTATAATTTTTTTTTATAGTTATACCAATTATAATTGGAGGATTTGGAAATTGATTAAATCC  
TTTAATATTAGGAGCCCCAGATATAGCTTTTCCTCGAATAAAATAATAAGATTTTGATTACTGCCCCCTCATTAACCTTTATTAATTTCTAGAAGA  
ATTGTAGAAAATGGAGCAGGAACAGGATGAACAGT'TTATCCCCCTTATCAATCTAATATCGCTCATAGAGGTAGTTCAGTTGATTAGCTATTTT  
CTTTACATTTAGCAGGAATTTCAATCAATCTTAGGAGCTATTAATTTTATTACAACATATTATTAATATACGAATTAATCATATATCATTGATCAAAT  
ACCTCTCTTTGTATGAGCAGTAGGAATTAC?GCTTTACTTTTATTATTATCTTTACCTGTATTAGCTGG?GCTATTACTATATTATTAACAGATCGA  
AATCT?AATACTTCATTTTTTGTATCCTGCAGGAGGTGGAGATCCTATTTTATATCAACATTTA

LOWAM073\_Kyrgyzstan\_Takhtalyk1  
ACACTATATTTTATTTTGGTATTTGAGCAGGTATAGTAGGAACCTCTTTAAGATTATTAATTCGTACTGAATTAGGTAATCCTGGATCTTTAATTG  
GAGATGATCAAATTTATAATACTATTGTAACAGCTCATGCTTTTATTATAATTTTTTTTTATAGTTATACCAATTATAATTGGAGGATTTGGAAATTG  
ATTAATTCCTTTAATATTAGGGGCCCCAGATATAGCTTTTCTCGAATAAAATAATAAGATTTTGATTATTACCCCTTCATTAACCTTTATTAATT  
TCTAGAAGAATTGTAGAAAAATGGAGCAGGAACAGGATGAACAGT'TTATCCCCCTTATCATCTAATATCGCTCATAGAGGTAGTTCAGTTGATTTAG  
CTATTTTTTCTTTACATTTAGCGGGGATTTCAATCAATCTTAGGAGCTATTAATTTTATTACAACATATTATTAATATACGAATTAATCATATATCATT  
TGATCAAATACCTCTCTTTGTATGAGCAGTAGGAATTACTGCTTTACTTTTATTATTATCTTTACCTGTATTAGCTGGTGCATTACTATATTATTA  
ACAGATCGAAATCTTAATACTTCATTTTTTGTATCCTGCAGGAGGTGGAGATCCTATTTTATATCAACATTTA

LOWAM074\_Kyrgyzstan\_Naryntoo  
ACACTATATTTTATTTTGGTATTTGAGCAGGTATAGTAGGAACCTCTTTAAGATTATTAATTCGTACTGAATTAGGTAATCCTGGATCTTTAATTG  
GAGATGATCAAATTTATAATACTATTGTAACAGCTCATGCTTTTATTATAATTTTTTTTTATAGTTATACCAATTATAATTGGAGGATTTGGAAATTG  
ATTAATTCCTTTAATATTAGGGGCCCCAGATATAGCTTTTCTCGAATAAAATAATAAGATTTTGATTATTACCCCTTCATTAACCTTTATTAATT  
TCTAGAAGAATTGTAGAAAAATGGAGCAGGAACAGGATGAACAGT'TTATCCCCCTTATCATCTAATATCGCTCATAGAGGTAGTTCAGTTGATTTAG  
CTATTTTTTCTTTACATTTAGCGGGAATTTCAATCAATCTTAGGAGCTATTAATTTTATTACAACATATTATTAATATACGAATTAATCATATATCATT  
TGATCAAATACCTCTCTTTGTATGAGCAGTAGGAATTACTGCTTTACTTTTATTACTATCTTTACCTGTATTAGCTGGTGCATTACTATATTATTA  
ACAGATCGAAATCTTAATACTTCATTTTTTGTATCCTGCAGGAGGTGGAGATCCTATTTTATATCAACATTTA

LOWAM086\_Turkmenistan\_3  
ACATTATATTTTATTTTGGTATTTGAGCAGGTATAGTAGGAACCTCTTTAAGATTATTAATTCGTACTGAATTAGGTAATCCTGGATCTTTAATTG  
GAGATGATCAAATTTATAATACTATTGTAACAGCTCATGCTTTTATTATAATTTTTTTTTATAGTTATACCAATTATAATTGGAGGATTTGGAAATTG  
ATTAATTCCTTTAATATTAGGAGGCCCCAGATATAGCTTTTCTCGAATAAAATAATAAGATTTTGATTATTACCCCTTCATTAACCTTTATTAATT  
TCTAGAAGAATTGTAGAAAAATGGAGCAGGAACAGGATGAACAGT'TTATCCCCCTTATCATCTAATATTGCCATAGAGGTAGTTCAGTTGATTTAG  
CTATCTTTTCTTTACATTTAGCAGGAATTTCAATCAATTTTAGGAGCTATTAATTTTATTACAACATATTATTAATATACGAATTAATCATATATCATT  
TGATCAAATACCTCTCTTTGTATGAGCAGTAGGAATTACTGCTTTACTTTTATTACTATCTTTACCTGTATTAGCTGGTGCATTACTATATTATTA  
ACAGATCGAAATCTTAATACTTCATTTTTTGTATCCTGCAGGAGGTGGAGATCCTATTTTATATCAACATTTA

LOWAM087\_Uzbekistan\_Sarchashma  
ACACTATATTTTATTTTGGTATTTGAGCAGGTATAGTAGGAACCTCTTTAAGATTATTAATTCGTACTGAATTAGGTAATCCTGGATCTTTAATTG  
GAGATGATCAAATTTATAATACTATTGTAACAGCTCATGCTTTTATTATAATTTTTTTTCATAGTTATACCAATTATAATTGGAGGATTTGGAAATTG  
ATTAATTCCTTTAATATTAGGAGGCCCCAGATATAGCTTTTCTCGAATAAAATAATAAGATTTTGATTACTACCCCTTCATTAACCTTTATTAATT  
TCCAGAAGAATTGTAGAAAAATGGAGCAGGAACAGGATGAACAGT'TTATCCCCCTTATCATCTAATATCGCTCATAGAGGTAGTTCAGTTGATTTAG  
CTATTTTTTCTTTACATTTAGCAGGAATTTCAATCAATTTTAGGAGCTATTAATTTTATTACAACATATTATTAATATACGAATTAACCATATATCATT  
TGATCAAATACCTCTCTTTGTATGAGCAGTAGGAATTACTGCTTTACTTTTATTATTATCTTTACCTGTATTAGCTGGTGCATTACTATATTATTA  
ACAGATCGAAATCTTAATACTTCATTTTTTGTATCCTGCAGGAGGTGGAGATCCTATTTA?ATCAACATTTA

LOWAM095\_Kyrgyzstan\_Sosnovka  
ACACTATATTTTATTTTGGTATTTGAGCAGGTATAGTAGGAACCTCTTTAAGATTATTAATTCGTACTGAATTAGGTAATCCTGGATCTTTAATTG  
GAGATGATCAAATTTATAATACTATTGTAACAGCTCATGCTTTTATTATAATTTTTTTTTATAGTTATACCAATTATAATTGGAGGATTTGGAAATTG  
ATTAATTCCTTTAATATTAGGGGCTCCAGATATAGCTTTTCTCGAATAAAATAATAAGATTTTGATTATTACCCCTTCATTAACCTTTATTAATT  
TCTAGAAGAATTGTAGAAAAATGGAGCAGGAACAGGATGAACAGT'TTATCCCCCTTATCATCTAATATCGCTCATAGAGGTAGTTCAGTTGATTTAG  
CTATTTTTTCTTTACATTTAGCGGGAATTTCAATCAATCTTAGGAGCTATTAATTTTATTACAACATATTATTAATATACGAATTAATCATATATCATT  
TGATCAAATACCTCTCTTTGTATGAGCAGTAGGAATTACTGCTTTACTTTTATTACTATCTTTACCTGTATTAGCTGGTGCATTACTATATTATTA  
ACAGATCGAAATCTTAATACTTCATTTTTTGTATCCTGCAGGAGGTGGAGATCCTATTTTATATCAACATTTA

LOWAM096\_Gissar\_5  
ACACTATATTTTATTTTGGTATTTGAGCAGGTATAGTAGGAACCTCTTTAAGATTATTAATTCGTACTGAATTAGGTAATCCTGGATCTTTAATTG  
GAGATGATCAAATTTATAATACTATTGTAACAGCTCATGCTTTTATTATAATTTTTTTTCATAGTTATACCAATTATAATTGGAGGATTTGGAAATTG  
ATTAATTCCTTTAATATTAGGAGGCCCCAGATATAGCTTTTCTCGAATAAAATAATAAGATTTTGATTACTACCCCTTCATTAACCTTTATTAATT  
TCCAGAAGAATTGTAGAAAAATGGAGCAGGAACAGGATGAACAGT'TTATCCCCCTTATCGTCTAATATCGCTCATAGAGGTAGTTCAGTTGATTTAG  
CTATTTTTTCTTTACATTTAGCAGGAATTTCAATCAATTTTAGGAGCTATTAATTTTATTACAACATATTATTAATATACGAATTAACCATATATCATT  
TGATCAAATACCTCTCTTTGTATGAGCAGTAGGAATTACTGCTTTACTTTTATTATTATCTTTACCTGTATTAGCTGGTGCATTACTATATTATTA  
ACAGATCGAAATCTTAATACTTCATTTTTTGTATCCTGCAGGAGGTGGAGATCCTATTTTATATCAACATTTA

LOWAM098\_Tajikistan\_Khondizal  
ACACTATATTTTATTTTGGTATTTGAGCAGGTATAATAGGAACCTCTTTAAGATTATTAATTCGTACTGAATTAGGTAATCCTGGATCTTTAATTG  
GAGATGATCAAATTTATAATACTATTGTAACAGCTCATGCTTTTATTATAATTTTTTTTCATAGTTATACCAATTATAATTGGAGGATTTGGAAATTG  
ATTAATTCCTTTAATATTAGGAGGCCCCAGATATAGCTTTTCTCGAATAAAATAATAAGATTTTGATTACTACCCCTTCATTAACCTTTATTAATT  
TCCAGAAGAATTGTAGAAAAATGGAGCAGGAACAGGATGAACAGT'TTATCCCCCTTATCGTCTAATATCGCTCATAGAGGTAGTTCAGTTGATTTAG  
CTATTTTTTCTTTACATTTAGCAGGAATTTCAATCAATTTTAGGAGCTATTAATTTTATTACAACATATTATTAATATACGAATTAACCATATATCATT  
TGATCAAATACCTCTCTTTGTATGAGCAGTAGGAATTACTGCTTTACTTTTATTATTATCTTTACCTGTATTAGCTGGTGCATTACTATATTATTA  
ACAGATCGAAATCTTAATACTTCATTTTTTGTATCCTGCAGGAGGTGGAGATCCTATTTTATATCAACATTTA

LOWAM099\_Uzbekistan\_Kamchik\_2  
ACACTATATTTTATTTTGGTATTTGAGCAGGTATAGTAGGAACCTCTTTAAGATTATTAATTCGTACTGAATTAGGTAATCCTGGATCTTTAATTG  
GAGATGATCAAATTTATAATACTATTGTAACAGCTCATGCTTTTATTATAATTTTTTTTTATAGTTATACCAATTATAATTGGAGGATTTGGAAATTG



ATTAATTCCTTTAATATTAGGGGCCCCAGATATAGCTTTTCTCGAATAAATAATATAAGATTTTGATTATTACCCCTTCATTAACCTTTATTAATT  
TCTAGAAGAAATTGTAGAAAATGGAGCAGGAACAGGATGAACAGTTTATCCCCCTTTATCATCTAAATATCGCTCATAGAGGTAGTTCAGTTGAAATTG  
CTATTTTTTCTTTACATTTAGCAGGAATTTTCATCAATTTTAGGAGCTATTAATTTTATTACAACCTATTATTAATATACGAATTAATCATATATCATT  
TGATCAAATACCTCTCTTTGTATGAGCAGTAGGAATTACTGCTTTACTTTTATTACTATCTTTACCTGTATTAGCTGGTGCATTACTATATTATTA  
ACAGATCGAAATCTTAATACTTCATTTTTTGATCTCGCAGGAGGTGGAGATCCTATTTTATATCAACATTTA

LOWAM100\_Kyrgyzstan\_Konduk  
ACACTATATTTTATTTTGGTATTTGAGCAGGTATAGTAGGAACCTCTTTAAGATTATTAATTCGTACTGAATTAGGTAATCCTGGATCTTTAATTG  
GAGATGATCAAATTTATAATACTATTGTAACAGCTCATGCTTTTATTATAATTTTTTTTATAGTTATACCAATTATAATTGGAGGATTTGGAAATTG  
ATTAATTCCTTTAATATTAGGGGCCCCAGATATAGCTTTTCTCGAATAAATAATATAAGATTTTGATTATTACCCCTTCATTAACCTTTATTAATT  
TCTAGAAGAATTGTAGAAAATGGAGCAGGAACAGGATGAACAGTTTATCCCCCTTTATCATCTAATATCGCTCATAGAGGTAGTTCAGTTGATTTAG  
CTATTTTTTCTTTACATTTAGCGGAATTTTCATCAATCTTAGGAGCTATTAATTTTATTACAACCTATTATTAATATACGAATTAATCATATATCATT  
TGATCAAATACCTCTCTTTGTATGAGCAGTAGGAATTACTGCTTTACTTTTATTACTATCTTTACCTGTATTAGCTGGTGCATTACTATATTATTA  
ACAGATCGAAATCTTAATACTTCATTTTTTGATCTCGCAGGAGGTGGAGATCCTATTTTATATCAACATTTA

LOWAM115\_Azerbaijan\_Nyus\_Nyus  
ACACTATATTTTATTTTCGGTATTTGAGCAGGTATAGTAGGAACCTCTTTAAGATTATTAATTCGTACTGAATTAGGTAATCCCGGATCTTTAATTG  
GAGATGATCAAATTTATAACTATTGTAACAGCTCATGCTTTTATTATAATTTTTTTTATAGTTATACCAATTATAATTGGAGGATTTGGAAATTG  
ATTAATTCCTTTAATATTAGGAGCTCCAGATATAGCTTTTCTCGAATAAATAATATAAGATTTTGATTACTCCCCCTTCATTAACCTTTATTAATT  
TCTAGAAGAATTGTAGAAAATGGAGCAGGAACAGGATGAACAATTTATCCCCCTTTATCATCTAATATTGCTCATAGAGGTAGTTCAGTTGATTTAG  
CTATTTTTTCTTTACATTTAGCAGGAATTTTCATCAATCTTAGGAGCTATTAATTTTATTACAACCTATTATTAACATACGAATTAATCATATATCATT  
TGATCAAATACCTCTCTTTGTATGAGCAGTAGGAATTACTGCTTTACTTTTATTACTATCTTTACCTGTATTAGCTGGTGCATTACTATATTATTA  
ACAGATCGAAATCTTAATACTTCATTTTTTGATCTCGCAGGAGGTGGAGATCCTATTTTATATCAACACTTA

LOWAM116\_Iran\_Dizin\_2  
ACACTATATTTTATTTTCGGTATTTGAGCAGGTATAGTAGGAACCTCTTTAAGATTATTAATTCGTACTGAATTAGGTAATCCTGGATCTTTAATTG  
GAGATGATCAAATTTATAACACTATTGTAACAGCTCATGCTTTTATTATAATTTTTTTTATAGTTATACCAATTATAATTGGAGGATTTGGAAATTG  
ATTAATTCCTTTAATATTAGGAGCTCCAGATATAGCTTTTCTCGAATAAATAATATAAGATTTTGATTACTCCCCCTTCATTAACCTTTATTAATT  
TCTAGAAGAATTGTAGAAAATGGAGCAGGAACAGGATGAACAATTTATCCCCCTTTATCATCTAATATTGCTCATAGAGGTAGTTCAGTTGATTTAG  
CTATTTTTTCTTTACATTTAGCAGGAATTTTCATCAATCTTAGGAGCTATTAATTTTATTACAACCTATTATTAACATACGAATTAATCATATATCATT  
TGATCAAATACCTCTCTTTGTATGAGCAGTAGGAATTACTGCTTTACTTTTATTATTATCTTTACCTGTATTAGCTGGTGCATTACTATATTATTA  
ACAGATCGAAATCTTAATACTTCATTTTTTGATCTCGCAGGAGGTGGAGATCCTATTTTATATCAACACTTA

LOWAM122\_Russia\_Saratow\_1  
ACACTATATTTTATTTTGGTATTTGAGCAGGTATAGTAGGAACCTCTTTAAGATTATTAATTCGTACTGAATTAGGTAATCCTGGATCTTTAATTG  
GAGATGATCAAATTTATAACACTATTGTAACAGCTCATGCTTTTATTATAATTTTTTTTATAGTTATACCAATTATAATTGGAGGATTTGGAAATTG  
ATTAATTCCTTTAATATTAGGAGCTCCAGATATAGCTTTTCTCGAATAAATAATATAAGATTTTGATTACTACCCCTTCATTAACCTTTATTAATT  
TCTAGAAGAATTGTAGAAAATGGAGCAGGAACAGGATGAACAGTTTATCCCCCTTTATCATCTAATATCGCTCATAGAGGTAGTTCAGTTGATTTAG  
CTATTTTTTCTTTACATTTAGCAGGAATTTTCATCAATCTTAGGAGCTATTAATTTTATTACAACCTATTATTAACATACGAATTAACCATATATCATT  
TGATCAAATACCTCTCTTTGTATGAGCAGTAGGAATTACTGCTTTACTTTTATTATTATCTTTACCTGTATTAGCTGGTGCATTACTATATTATTA  
ACAGATCGAAATCTTAATACTTCATTTTTTGATCTCGCAGGAGGTGGGATCCTATTTTATATCAACATTTA

LOWAM136\_Uzbekistan\_Tamshush\_1  
ACACTATATTTTATTTTGGTATTTGAGCAGGTATAGTAGGAACCTCTTTAAGATTATTAATTCGTACTGAATTAGGTAATCCTGGATCTTTAATTG  
GAGATGATCAAATTTATAATACTATTGTAACAGCTCATGCTTTTATTATAATTTTTTTTATAGTTATACCAATTATAATTGGAGGATTTGGAAATTG  
ATTAATTCCTTTAATATTAGGAGCTCCAGATATAGCTTTTCTCGAATAAATAATATAAGATTTTGATTACTACCCCTTCATTAACCTTTATTAATT  
TCCAGAAGAATTGTAGAAAATGGAGCAGGAACAGGATGAACAGTTTATCCCCCTTTATCATCTAATATCGCTCATAGAGGTAGTTCAGTTGATTTAG  
CTATTTTTTCTTTACATTTAGCAGGAATTTTCATCAATTTTAGGAGCTATTAATTTTATTACAACCTATTATTAATATACGAATTAACCATATATCATT  
TGATCAAATACCTCTCTTTGTATGAGCAGTAGGAATTACTGCTTTACTTTTATTATTATCTTTACCTGTATTAGCTGGTGCATTACTATATTATTA  
ACAGATCGAAATCTTAATACTTCATTTTTTGATCTCGCAGGAGGTGGGATCCTATTTTATATCAACATTTA

LOWAM149\_Kyrgyzstan\_Songkel\_1  
ACACTATATTTTATTTTGGTATTTGAGCAGGTATAGTAGGAACCTCTTTAAGATTATTAATTCGTACTGAATTAGGTAATCCTGGATCTTTAATTG  
GAGATGATCAAATTTATAATACTATTGTAACAGCTCATGCTTTTATTATAATTTTTTTTATAGTTATACCAATTATAATTGGAGGATTTGGAAATTG  
ATTAATTCCTTTAATATTAGGGGCCCCAGATATAGCTTTTCTCGAATAAATAATATAAGATTTTGATTACTACCCCTTCATTAACCTTTATTAATT  
TCTAGAAGAATTGTAGAAAATGGAGCAGGAACAGGATGAACAGTTTATCCCCCTTTATCATCTAATATTGCTCATAGAGGTAGTTCAGTTGATTTAG  
CTATTTTTTCTTTACATTTAGCGGAATTTTCATCAATCTTAGGAGCTATTAATTTTATTACAACCTATTATTAATATACGAATTAATCATATATCATT  
TGATCAAATACCTCTCTTTGTATGAGCAGTAGGAATTACTGCTTTACTTTTATTATTATCTTTACCTGTATTAGCTGGTGCATTACTATATTATTA  
ACAGATCGAAATCTTAATACTTCATTTTTTGATCTCGCAGGAGGTGGAGATCCTATTTTATATCAACATTTA

LOWAM198\_Turkey\_Aladaglar\_2  
ACACTATATTTTATTTTGGTATTTGAGCAGGTATAGTAGGAACCTCTTTAAGATTATTAATTCGTACTGAATTAGGTAATCCTGGATCTTTAATTA  
GAGATGATCAAATTTATAATACTATTGTAACAGCTCATGCTTTTATTATAATTTTTTTTATAGTTATACCAATTATAATTGGAGGATTTGGAAATTG  
ATTAATTCCTTTAATATTAGGAGCTCCAGATATAGCTTTTCTCGAATAAATAATATAAGATTTTGATTACTCCCCCTTCATTAACCTTTATTAATT  
TCTAGAAGAATTGTAGAAAATGGAGCAGGAACAGGATGAACAGTTTATCCCCCTTTATCATCTAATATTGCTCATAGAGGTAGTTCAGTTGATTTAG  
CTATTTTTTCTTTACATTTAGCAGGAATTTTCATCAATCTTAGGAGCTATTAATTTTATTACAACCTATTATTAATATA-----  
-----  
-----

LOWAM213\_Tajikistan\_Tandukul\_1  
ACACTATATTTTATTTTGGTATTTGAGCAGGTATAGTAGGAACCTCTTTAAGATTATTAATTCGTACTGAATTAGGTAATCCTGGATCTTTAATTG  
GAGATGATCAAATTTATAATACTATTGTAACAGCTCATGCTTTTATTATAATTTTTTTTATAGTTATACCAATTATAATTGGAGGATTTGGAAATTG  
ATTAATTCCTTTAATATTAGGAGCTCCAGATATAGCTTTTCTCGAATAAATAATATAAGATTTTGATTACTACCCCTTCATTAACCTTTATTAATT  
TCTAGAAGAATTGTAGAAAATGGAGCAGGAACAGGATGAACAGTTTATCCCCCTTTATTATCTAATATCGCTCATAGAGGTAGTTCAGTTGATTTAG  
CTATTTTTTCTTTACATTTAGCAGGAATTTTCATCAATTTTAGGAGCTATTAATTTTATTACAACCTATTATTAATATA-----  
-----  
-----

Parnassius\_clodius  
ACATTATATTTTATTTTGGTATTTGAGCAGGTATAGTAGGAACCTCTTTAAGATTATTAATTCGTACTGAATTAGGTAATCCTGGATCTTTAATTG

GAGATGATCAAATTTATAACTATTGTAAACAGCTCATGCTTTTATCATAATTTTTTTCATAGTTATACCAATTATAATTGGAGGATTTGGAAATTG  
ATTAATTCATTAAATATTAGGAGCTCCAGATATAGCTTTTCTCGAATAAAATAATATAAGATTTTGATTATTACCCCTTCATTAACCTTTATTAATT  
TCTAGAAGAATTGTACAAAATGGAGCAGGAACCTGGATGAACAGTTTATCCCCCTTTATCATCTAATATTGCTCATAGAGGAAGATCAGTTGATTTAG  
CTATTTTTCTTTACATTTAGCTGGAATTTTCATCTATCTTAGGAGCTATTAAATTTTATTACAACCTATTATTAAATATACGAATTAATCATATATCATT  
TGATCAAATACCCCTTTTGTATGAGCAGTAGGAATTACCGCTTTACTTCTATTATTATCTTTACCTGTTTTAGCAGGTGCTATTACCATATTATTA  
ACAGATCGAAATCTTAATACTTCATTTTTTGATCCAGCAGGAGGTGGAGATCCTATTTTATATCAACACTTA

Parnassius\_eversmanni\_2005\_LOWA\_108 -----  
ATTTGAGCAGGTATAGTAGGAACCTCTTTAAGATTATTAATTCGTTCTGAATTAGGTAATCCTGGATCTTTAATTGGAGATGATCAAATTTATAATA  
CTATTGTAACAGCTCATGCTTTTATTATAATTTTTTTTATAGTTATACCAATTATAATTGGAGGATTTGGAAATTGATTAATTCATTAAATATTAGG  
AGCTCCAGATATAGCTTTTCTCGAATAAAATAATATAAGATTTTGATTATTACCCCTCATTAACCTTACTAATTTCTAGAAGAATTGTAGAAAAT  
GGAGCAGGAACCTGGATGAACGGTTTATCCCCCTTTATCATCTAATATTGCTCATAGAGGAAGATCAGTTGATTTAGCTATCTTTCTTTACATTTAG  
CTGGAATTTTCATCTATCTTAGGAGCTATTAATTTTATTACAACCTATTATTAAATATACGAATTAATCATATATCATTGATCAAATACCCCTTTTGT  
ATGAGCAGTAGGAATTACTGCTTTTACTTTTATTATATCTTTTACCTGTTTTAGCAGGTGCTATTACCATATTATTAACAGATCGAAATCTTAATACT  
TCATTTTTTGACCCAGCAGGAGGTGGAGATCCTATTTTATATCAACACTTA

Parnassius\_eversmanni\_2005\_LOWA\_107 -----  
ATTTGAGCAGGTATAGTAGGAACCTCTTTAAGATTATTAATTCGTTCTGAATTAGGTAATCCTGGATCTTTAATTGGAGATGATCAAATTTATAATA  
CTATTGTAACAGCTCATGCTTTTATTATAATTTTTTTTATAGTTATACCAATTATAATTGGAGGATTTGGAAATTGATTAATTCATTAAATATTAGG  
AGCTCCAGATATAGCTTTTCTCGAATAAAATAATATAAGATTTTGATTATTACCCCTCATTAACCTTACTAATTTCTAGAAGAATTGTAGAAAAT  
GGAGCAGGAACCTGGATGAACGGTTTATCCCCCTTTATCATCTAATATTGCTCATAGAGGAAGATCAGTTGATTTAGCTATCTTTCTTTACATTTAG  
CTGGAATTTTCATCTATCTTAGGAGCTATTAATTTTATTACAACCTATTATTAAATATACGAATTAATCATATATCATTGATCAAATACCCCTTTTGT  
ATGAGCAGTAGGAATTACTGCTTTTACTTTTATTATATCTTTTACCTGTTTTAGCAGGTGCTATTACCATATTATTAACAGATCGAAATCTTAATACT  
TCATTTTTTGACCCAGCAGGAGGTGGAGATCCTATTTTATATCAACACTTA

Parnassius\_stubbendorfii\_2005\_LOWA\_815  
ACATTATATTTTATTTTGGTATTTGAGCAGGTATAGTAGGAACCTCTTTAAGATTATTAATTCGTTACTGAATTAGGTAATCCTGGATCTTTAATTG  
GAGATGATCAAATTTATAACTATTGTAAACAGCTCATGCTTTTATTATAATTTTTTTTATAGTTATACCAATTATAATTGGAGGATTTGGAAATTG  
ATTAATTCCTTTAATATTAGGAGCCCCAGATATAGCTTTTCTCGAATAAAATAATATAAGATTTTGATTATTACCCCTTCATTAACCTTTACTAATT  
TCCAGAAGAATTGTAGAAAATGGGCAGGAACCTGGATGAACAGTCTACCCTCCTTTATCATCTAATATTGCTCAGGAGGAAGATCTGTTGATTTAG  
CTATTTTTCTTTACATTTAGCGGAATTTTCATCTATTTTAGGAGCCATTAATTTTATTACAACCTATTATTAAATATACGAATTAATCATATATCATT  
TGATCAAATACCTCTTTTGTATGAGCAGTAGGAATTACTGCTTTACTTTTATTATATCTCTACCTGTTTTAGCAGGTGCTATTACTATATTATTA  
ACAGATCGAAATCTTAATACTTCATTTTTTGACCCAGCAGGAGGTGGAGATCCTATTTTATATCAACACTTA

Parnassius\_stubbendorfii\_2005\_LOWA\_154  
ACATTATATTTTATTTTGGTATTTGAGCAGGTATAGTAGGAACCTCTTTAAGATTATTAATTCGTTACTGAATTAGGTAATCCTGGATCTTTAATTG  
GAGATGATCAAATTTATAACTATTGTAAACAGCTCATGCTTTTATTATAATTTTTTTTATAGTTATACCAATTATAATTGGAGGATTTGGAAATTG  
ATTAATTCCTTTAATATTAGGAGCCCCAGATATAGCTTTTCTCGAATAAAATAATATAAGATTTTGATTATTACCCCTTCATTAACCTTTACTAATT  
TCCAGAAGAATTGTAGAAAATGGGCAGGAACCTGGATGAACAGTCTACCCTCCTTTATCATCTAATATTGCTCAGGAGGAAGATCTGTTGATTTAG  
CTATTTTTCTTTACATTTAGCGGAATTTTCATCTATTTTAGGAGCCATTAATTTTATTACAACCTATTATTAAATATACGAATTAATCATATATCATT  
TGATCAAATACCTCTTTTGTATGAGCAGTAGGAATTACTGCTTTACTTTTATTATATCTCTACCTGTTTTAGCAGGTGCTATTACTATATTATTA  
ACAGATCGAAATCTTAATACTTCATTTTTTGACCCAGCAGGAGGTGGAGATCCTATTTTATATCAACACTTA

Parnassius\_stubbendorfii\_2005\_LOWA\_153 -  
CATTATATTTTATTTTGGTATTTGAGCAGGTATAGTAGGAACCTCTTTAAGATTATTAATTCGTTACTGAATTAGGTAATCCTGGATCTTTAATTG  
AGATGATCAAATTTATAACTATTGTAAACAGCTCATGCTTTTATTATAATTTTTTTTATAGTTATACCAATTATAATTGGAGGATTTGGAAATTGA  
TTAATTCCTTTAATATTAGGAGCCCCAGATATAGCTTTTCTCGAATAAAATAATATAAGATTTTGATTATTACCCCTTCATTAACCTTTACTAATT  
CCAGAAGAATTGTAGAAAATGGGCAGGAACCTGGATGAACAGTCTACCCTCCTTTATCATCTAATATTGCTCAGGAGGAAGATCTGTTGATTTAGC  
TATTTTTCTTTACATTTAGCGGAATTTTCATCTATTTTAGGAGCCATTAATTTTATTACAACCTATTATTAAATATACGAATTAATCATATATCATT  
GATCAAATACCTCTTTTGTATGAGCAGTAGGAATTACTGCTTTACTTTTATTATATCTCTACCTGTTTTAGCAGGTGCTATTACTATATTATTA  
CAGATCGAAATCTTAATACTTCATTTTTTGACCCAGCAGGAGGTGGAGATCCTATTTTATATCAACACTTA

Parnassius\_nordmanni  
ACATTATATTTTATTTTGGTATTTGAGCAGGTATAGTAGGAACCTCTTTAAGATTATTAATTCGTTACTGAATTAGGTAATCCTGGATCTCTAATTG  
GAGATGATCAAATTTACAATACTATTGTAAACAGCTCATGCTTTTATTATAATTTTTTTTATAGTTATACCAATTATAATTGGAGGATTTGGAAATTG  
ATTAATTCATTAAATATTAGGAGCTCCAGATATAGCTTTCCCCGAATAAAATAATATAAGATTTTGATTATTACCCCTTCATTAACCTCTATTAATT  
TCTAGAAGAATTGTAGAAAATGGGCAGGAACCTGGATGAACAGTCTACCCTCCTTTATCATCTAATATTGCTCATAGAGGAAGATCAGTTGACTTAG  
CTATTTTTCTTTACATTTGGCTGGGATTTCTTCTATTTTAGGAGCTATTAATTTTATCACAACTATTGTTAAATATACGAATTAATCATATATCATT  
TGATCAAATACCTCTTTTCGTATGAGCAGTAGGAATTACTGCTTTACTTTTATTATATCTTTACCTGTTTTAGCAGGTGCTATTACTATATTATTA  
ACAGATCGAAATCTTAATACTTCATTTTTTGATCCAGCAGGAGG?GGAGACCCTATTCTATATCAA-----

Parnassius\_eversmanni  
ACATTATATTTTATTTTGGTATTTGAGCAGGTATAGTAGGAACCTCTTTAAGATTATTAATTCGTTCTGAATTAGGTAATCCTGGATCTTTAATTG  
GAGATGATCAAATTTATAACTATTGTAAACAGCTCATGCTTTTATTATAATTTTTTTTATAGTTATACCAATTATAATTGGAGGATTTGGAAATTG  
ATTAATTCATTAAATATTAGGAGCTCCAGATATAGCTTTTCTCGAATAAAATAATATAAGATTTTGATTATTACCCCTTCATTAACCTTACTAATT  
TCTAGAAGAATTGTAGAAAATGGGCAGGAACCTGGATGAACGGTTTATCCCCCTTTATCATCTAATATTGCTCATAGAGGAAGATCAGTTGATTTAG  
CTATCTTTCTTTACATTTAGCTGGAATTTTCATCTATCTTAGGAGCTATTAATTTTATTACAACCTATTATTAAATATACGAATTAATCATATATCATT  
TGATCAAATACCCCTTTTGTATGAGCAGTAGGAATTACTGCTTTACTTTTATTATATCTTTACCTGTTTTAGCAGGTGCTATTACCATATTATTA  
ACAGATCGAAATCTTAATACTTCATTTTTTGACCCAGCAGGAGGTGGAGATCCTATTTTATATCAA-----

Parnassius\_eversmanni\_felderi  
ACATTATATTTTATTTTGGTATTTGAGCAGGTATAGTAGGAACCTCTTTAAGATTATTAATTCGTTCTGAATTAGGTAATCCTGGATCTTTAATTG  
GAGATGATCAAATTTATAACTATTGTAAACAGCTCATGCTTTTATTATAATTTTTTTTATAGTTATACCAATTATAATTGGAGGATTTGGAAATTG  
ATTAATTCATTAAATATTAGGAGCTCCAGATATAGCTTTTCTCGAATAAAATAATATAAGATTTTGATTATTACCCCTTCATTAACCTTACTAATT  
TCTAGAAGAATTGTAGAAAATGGGCAGGAACCTGGATGAACGGTTTATCCCCCTTTATCATCTAATATTGCTCATAGAGGAAGATCAGTTGATTTAG  
CTATCTTTCTTTACA?TTAGCTGGAATTTTCATCTATCTTAGGAGCTATTAATTTTATTACAACCTATTATTAAATATACGAATTAATCATATATCATT  
TGATCAAATACCCCTTTTGTATGAGCAGTAGGAATTACTGCTTTACTTTTATTATATCTTTACCTGTTTTAGCAGGTGCTATTACCATATTATTA  
ACAGATCGAAATCTTAATACTTCATTTTTTGACCCAGCAGGAGGTGGAGATCCTATTTTATATCAA-----

Parnassius\_ariadne\_ariadne  
ACATTATATTTTATTTTGGTATTTGAGCAGGTATAGTAGGAACCTCTTTAAGATTATTAATTCGTACTGAATTAGGTAATCCTGGATCTTTAATTG  
GAGATGATCAAATTTATAATACTATCGTAACAGCTCATGCTTTTATTATAATTTTTTTTATAGTTATACCAATTATAAATTGGAGGATTGGAAATTG  
ATTAATTCCTTTAATATTAGGAGCTCCAGATATAGCCTTTCTCGAATAAATAATATAAGATTTTGATTACTACCCCTCATTAACCTTTATTAATC  
TCTAGAAGAATTGTAGAAAATGGAGCAGGAACCTGGATGAACAGTTTATCCCCCTTTATCATCTAATATTGCTCATAGAGGAAGTTGAGTTGATTAG  
CCATTTCTCTTTTACATTTAGCAAAATGGAGCAGGAATTTTCATCAATTTTATAGGAGCTATTAAATTTTATCACAACCTATTATTAATATCGAATTAATCATATATCATT  
TGATCAAATACCCCTTTTGTGTTGAGCAGTAGGAATTACTGCTTTACTATTATTATTATCTTTACCTGTATTAGCTGGTGTATTACTATATTATTA  
ACAGATCGAAATCTTAATACTTCTTTTTTGTATCCAGCAGGA??GAGATCCTATTTTATATCAA-----

Parnassius\_glacialis\_mikado  
ACATTATATTTTATTTTGGTATTTGAGCAGGTATAGTAGGAACCTCCTTAAGATTATTAATTCGTACTGAATTAGGTAATCCTGGATCTTTAATTG  
GAGATGATCAAATTTATAATACTATGTAAACAGCTCATGCTTTTATTATAATTTTTTTTATAGTTATACCAATTATAAATTGGAGGATTGGAAATTG  
ATTAATCCCTTTAATATTAGGAGCTCCAGATATAGCCTTTCCCGGAATAAATAATATAAGATTTTGATTATACCCCTCATTAACCTTTACTAATT  
TCCAGAGAATTGTAGAAAATGGAGCAGGAACAGGATGAACAGTTTATCCCCCATTTACCTCTAATATTGCCACAGAGGAAGATCTGTTGATTAG  
CTATTTTTCTTTACATTTAGCAGGAATTTTCATCTATTCTAGGAGCTATTAAATTTTATTACAACCTATTATTAATATACGAATTAATCATATATCATT  
TGATCAAATACCTCTCTTTGTTGAGCAGTAGGAATTACTGCTTTACTTTTATTATTATCCTTACCTGTTTTAGCAGGTGCTATTACTATATTATTA  
ACAGATCGAAATCTTAATACTTCTTTTTTGTACCCAGCAGGAGGTGGAGATCCAATTTTATATCAA-----

Parnassius\_stubbendorfii\_hoenei  
ACATTATATTTTATTTTGGTATTTGAGCAGGAATAGTAGGAACCTCCCTAAGATTATTAATTCGTACTGAATTAGGTAATCCCGGATCTTTAATTG  
GAGATGATCAAATTTACAATACTATTGTAAACAGCTCATGCTTTCATTATAATTTTTTTTATAGTTATACCAATTATAAATTGGAGGATTGGAAATTG  
ACTGATTCCTTTAATATTAGAGCCAGATATAGCTTTCCCGGAATAAATAATATAAGATTTTGATTACTACCCCTCATTAACCTTTATTAATT  
TCTAGAAGAATTGTAGAAAATGGAGCAGGAACCTGGATGAACAGTCTATCCCCCTTTATCATCTAATATTGCCATAGAGGAAGATCCGTTGATTAG  
CTATTTTTCTTTACATTTAGCAGGAATTTTCATCTATTTTAGGAGCCATTAATTTTATTACAACCTATTATTAATATACGAATTAATCATATATCATT  
TGATCAAATACCTCTTTTGTATGAGCAGTAGGAATTACTGCTTTACTTTTATTATTATCTTTACCTGTTTTAGCAGGTGCTATTACTATATTATTA  
ACAGATCGAAATCTTAATACTTCTTTTTTGTACCCAGCAGGAGGTGGAGATCCTATTTTATACCAA-----

Parnassius\_stubbendorfii\_hoenei\_AC20\_16 -----  
TGAGCAGGAATAGTAGGAACCTCCCTAAGATTATTAATTCGTACTGAATTAGGTAATCCCGGATCTTTAATTGGAGATGATCAAATTTACAATACTA  
TTGTAACAGCTCATGCTTTTATTATAATTTTTTTTATAGTTATACCAATTATAAATTGGAGGATTGGAAATTGACTGATTCCTTTAATATTAGGAGC  
CCCAGATATAGCTTTCCCGGAATAAATAATATAAGATTTTGATTACTACCCCTCATTAACCTTTATTAATTTCTAGAAGAATTGTAGAAAATGGA  
GCAGGAACCTGGATGAACAGTCTATCCCCCTTTATCATCTAATATTGCCATAGAGGAAGATCCGTTGATTAGCTATTTTTCTTTACATTTAGCAG  
GAATTTTCATCTATTTTAGGAGCCATTAATTTTATTACAACCTATTATTAATATACGAATTAATCATATATCATTTGATCAAATACCTCTTTTGTATG  
AGCAGTAGGAATTACTGCTTTACTTTTATTATTATCTTTACCTGTTTTAGCAGGTGCTATTACTATATTATTAACAGATCGAAATCTTAATACTTCC  
TTTTTTGACCCGAGGAGGTGGAGATCCTATTTTATACCAACATTTA

Parnassius\_stubbendorfii\_koreanus -----  
TGAGCAGGTATAGTAGGAACCTCTTTAAGATTATTAATTCGTACTGAATTAGGTAATCCTGGATCTTTAATTGGAGATGATCAAATTTATAATACTA  
TTGTAACAGCTCATGCTTTTATTATAATTTTTTTTATAGTTATACCAATTATAAATTGGAGGATTGGAAATTGATTAAATTCCTTTAATATTAGGAGC  
CCCAGATATAGCTTTTCTCGAATAAATAATATAAGATTTTGACTATTACCCCTCATTAACCTTTACTAATTTCCAGAAGAATTGTAGAAAATGGA  
GCAGGAACCTGGATGAACAGTCTACCTCCTTTATCATCTAATATTGCTCATAGGAGGAAGATCTGTTGATTAGCTATTTTTCTTTACATTTAGCAG  
GAATTTTCATCTATTTTAGGAGCCATTAATTTTATTACAACCTATTATTAATATACGAATTAATCATATATCATTTGATCAAATACCTCTTTTGTATG  
AGCAGTAGGAATTACTGCTTTACTTTTATTATTATCTTTACCTGTTTTAGCAGGTGCTATTACTATATTATTAACAGATCGAAATCTTAATACTTCA  
TTTTTTGACCCAGCAGGAGGTGGAGATCCTATTTTATATCAACACTTA

Parnassius\_nordmanni\_AC20\_5 -----  
TGAGCAGGTATAGTAGGAACCTCTTTAAGATTATTAATTCGTACTGAATTAGGTAATCCTGGATCTCTAATTGGAGATGATCAAATTTACAATACTA  
TCGTAACAGCTCATGCTTTTATTATAATTTTTTTTATAGTTATACCAATTATAAATTGGAGGATTGGAAATTGATTAAATCCATTAAATATTAGGAGC  
TCCAGATATAGCTTTCCCGGAATAAATAATATAAGATTTTGATTATTACCCCTCATTAACCTCTATTAATTTCTAGAAGAATTGTAGAAAATGGG  
GCAGGAACCTGGATGAACAGTTTACCCCTTTTATCATCTAATATTGCTCATAGAGGAAGATCAGTTGACTTTAGCTATTTTTCTTTACATTTGGCTG  
GGATTTCTCTATTTTAGGAGCTATTAATTTTATCACAACCTATTGCTCATAGGAGGAAGATCAGTTGATTAGCTATTTTTCTTTACATTTAGCAG  
AGCAGTAGGAATTACTGCTTTACTTTTATTATTATCTTTACCTGTTTTAGCAGGTGCTATTACTATATTATTAACAGATCGAAATCTTAATACTTCA  
TTTTTTGATCCAGCAGGAGGTGGAGACCTATTCTATATCAACATTTA

Parnassius\_eversmanni\_felderi\_AC23\_68 -----  
TGAGCAGGTATAGTAGGAACCTCTTTAAGATTATTAATTCGTCTCTGAATTAGGTAATCCTGGATCTTTAATTGGAGATGATCAAATTTATAATACTA  
TTGTAACAGCTCATGCTTTTATTATAATTTTTTTTATAGTTATACCAATTATAAATTGGAGGATTGGAAATTGATTAAATCCATTAAATATTAGGAGC  
TCCAGATATAGCTTTTCTCGAATAAATAATATAAGATTTTGATTATTACCCCTCATTAACCTTACTAATTTCTAGAAGAATTGTAGAAAATGGA  
GCAGGAACCTGGATGAACAGTCTATCCCCCTTTATCATCTAATATTGCTCATAGAGGAAGATCAGTTGATTAGCTATTTTTCTTTACATTTAGCTG  
GAATTTCTCTATTTTAGGAGCTATTAATTTTATTACAACCTATTATTAATATACGAATTAATCATATATCATTTGATCAAATACCCCTTTTGTATG  
AGCAGTAGGAATTACTGCTTTACTTTTATTATTATCTTTACCTGTTTTAGCAGGTGCTATTACCATATTATTAACAGATCGAAATCTTAATACTTCA  
TTTTTTGACCCAGCAGGAGGTGGAGATCCTATTTTATTTCAACATTTA

Parnassius\_eversmanni\_eversmanni\_AC1\_14 -----  
TGATCAGGTATAGTAGGAACCTCTTTAAGATTATTAATTCGTCTCTGAATTAGGTAATCCTGGATCTTTAATTGGAGATGATCAAATTTATAATACTA  
TTGTAACAGCTCATGCTTTTATTATAATTTTTTTTATAGTTATACCAATTATAAATTGGAGGATTGGAAATTGATTAAATCCATTAAATATTAGGAGC  
TCCAGATATAGCTTTTCTCGAATAAATAATATAAGATTTTGATTATTACCCCTCATTAACCTTACTAATTTCTAGAAGAATTGTAGAAAATGGA  
GCAGGAACCTGGATGAACGGTTTATCCCCCTTTATCATCTAATATTGCTCATAGAGGAAGATCAGTTGATTAGCTATCTTTCTTTACATTTAGCTG  
GAATTTTCATCTATCTTAGGAGCTATTAATTTTATTACAACCTATTATTAATATACGAATTAATCATATATCATTTGATCAAATACCCCTTTTGTATG  
AGCAGTAGGAATTACTGCTTTACTTTTATTATTATCTTTACCTGTTTTAGCAGGTGCTATTACCATATTATTAACAGATCGAAATCTTAATACTTCA  
TTTTTTGACCCAGCAGGAGGTGGAGATCCTATTTTATTTCAACATTTA

Parnassius\_clodius\_AC4\_5 -----  
TGAGCAGGAATATTAGGAACCTCTTTAAGATTATTAATTCGTACTGAATTAGGTAATCCTGGATCTTTAATTGGAGATGATCAAATTTATAATACTA  
TTGTAACAGCTCATGCTTTTATTATAATTTTTTTTATAGTTATACCAATTATAAATTGGAGGATTGGAAATTGATTAAATCCATTAAATATTAGGAGC  
TCCAGATATAGCTTTTCTCGAATAAATAATATAAGATTTTGATTATTACCCCTTCATTAACCTTTATTAATTTCTAGAAGAATTGTAGAAAATGGA  
GCAGGAACCTGGATGAACAGTCTATCCCCCTTTATCATCTAATATTGCTCATAGAGGAAGATCAGTTGATTAGCTATTTTTCTTTACATTTAGCTG  
GAATTTTCATCTATCTTAGGAGCTATTAATTTTATTACAACCTATTATTAATATACGAATTAATCATATATCATTTGATCAAATACCCCTTTTGTATG  
AGCAGTAGGAATTACTGCTTTACTTTTATTATTATCTTTACCTGTTTTAGCAGGTGCTATTACCATATTATTAACAGATCGAAATCTTAATACTTCA  
TTTTTTGATCCAGCAGGAGGTGGAGATCCTATTTTATATCAACACTTA

Parnassius\_ariadne\_AC4\_14 -----  
TGAGCAGGTATAGTAGGAACCTCTTTAAGATTATTAATTCGTACTGAATTAGGTAATCCTGGATCTTTAATTGGAGATGATCAAATTTATAATACTA  
TCGTAACAGCTCATGCTTTTATTATAATTTTATAGTTATACCAATTATAAATTGGAGGATTTGGAAATTGATTAAATTCCTTTAATATTAGGAGC  
TCCAGATATAGCCTTTCTCGAATAAATAATATAAGATTTTGATTACTACCCCCCTCATTAACTTTATTAATCTCTAGAGAATTGTAGAAAATGGA  
GCAGGAACTCGGATGAACAGTTTATCCCCCTTATCATCTAATATTGCTCAAAGAAGTTGAGTTGATTAGCCCTCTTTACATTATTAGCAG  
GAATTTTCATCAATTTTAGGAGCTATTAATTTTATCACAACATTATTAATATACGAATTAATCATATATCATTTGATCAAATACCCCTTTTGTGTTG  
AGCAGTAGGAATTACTGCTTTACTATTATTATCTTTACCTGTATTAGCTGGTGCTATTACTATATCATTAACAGATCGAAATCTTAATACTTCA  
TTTTTTGATCCAGCAGGAGGTGGAGATCCTATTTTATATCAACACTTA

HQ004911\_RV\_07\_C107\_Romania  
ACACTATATTTTATTTTGGTATTTGAGCAGGTATAGTAGGAACCTCTTTAAGATTATTAATTCGTACTGAATTAGGTAATCCTGGATCTTTAATTG  
GAGATGATCAAATTTATAATACTATTGTAACAGCTCATGCTTTTATTATAATTTTTTTTATAGTTATACCAATTATAAATTGGAGGATTTGGAAATTG  
ATTAATTCCTTTAATATTAGGAGCCCCAGATATAGCTTTTCTCGAATAAATAATATAAGATTTTGATTACTACCCCTCTATTAACTTTATTAGAT  
TCTAGAAGAATTGTAGAAAATGGAGCAGGAACAGGATGAACAGTTTATCCCCCTTATCATCTAATATCGCTCATAGAGGTAGTTCAGTTGATTTAG  
CTATTTTTCTTTACATTTAGCAGGAATTCATCAATCTTAGGAGCTATTAATTTTATTACAACATTATTAAATATACGAATTAACCATATATCATT  
TGATCAAATACCTCTCTTTGTATGAGCAGTAGGAATTACTGCTTTACTTTTATTATTATCTTTACCTGTATTAGCTGGTGCTATTACTATATTATTA  
ACAGATCGAAATCTTAATACTTCATTTTTTGATCCTGCAGGAGGTGGAGATCCTATTTTATATCAACATTTA

HQ004908\_RV\_07\_D060\_Romania  
ACACTATATTTTATTTTGGTATTTGAGCAGGTATAGTAGGAACCTCTTTAAGATTATTAATTCGTACTGAATTAGGTAATCCTGGATCTTTAATTG  
GAGATGATCAAATTTATAATACTATTGTAACAGCTCATGCTTTTATTATAATTTTTTTTATAGTTATACCAATTATAAATTGGAGGATTTGGAAATTG  
ATTAATTCCTTTAATATTAGGAGCCCCAGATATAGCTTTTCTCGAATAAATAATATAAGATTTTGATTACTACCCCTCTATTAACTTTATTAAAT  
TCTAGAAGAATTGTAGAAAATGGAGCAGGAACAGGATGAACAGTTTATCCCCCTTATCATCTAATATCGCTCATAGAGGTAGTTCAGTTGATTTAG  
CTATTTTTCTTTACATTTAGCAGGAATTCATCAATCTTAGGAGCTATTAATTTTATTACAACATTATTAAATATACGAATTAACCATATATCATT  
TGATCAAATACCTCTCTTTGTATGAGCAGTAGGAATTACTGCTTTACTTTTATTATTATCTTTACCTGTATTAGCTGGTGCTATTACTATATTATTA  
ACAGATCGAAATCTTAATACTTCATTTTTTGATCCTGCAGGAGGTGGAGATCCTATTTTATATCAACATTTA

HQ004907\_RV\_08\_M274\_Romania  
ACACTATATTTTATTTTGGTATTTGAGCAGGTATAGTAGGAACCTCTTTAAGATTATTAATTCGTACTGAATTAGGTAATCCTGGATCTTTAATTG  
GAGATGATCAAATTTATAATACTATTGTAACAGCTCATGCTTTTATTATAATTTTTTTTATAGTTATACCAATTATAAATTGGAGGATTTGGAAATTG  
ATTAATTCCTTTAATATTAGGAGCCCCAGATATAGCTTTTCTCGAATAAATAATATAAGATTTTGATTACTACCCCTCTATTAACTTTATTAAAT  
TCTAGAAGAATTGTAGAAAATGGAGCAGGAACAGGATGAACAGTTTATCCCCCTTATCATCTAATATCGCTCATAGAGGTAGTTCAGTTGATTTAG  
CTATTTTTCTTTACATTTAGCAGGAATTCATCAATCTTAGGAGCTATTAATTTTATTACAACATTATTAAATATACGAATTAACCATATATCATT  
TGATCAAATACCTCTCTTTGTATGAGCAGTAGGAATTACTGCTTTACTTTTATTATTATCTTTACCTGTATTAGCTGGTGCTATTACTATATTATTA  
ACAGATCGAAATCTTAATACTTCATTTTTTGATCCTGCAGGAGGTGGAGATCCTATTTTATATCAACATTTA

HQ004902\_RV\_08\_M361\_Romania  
ACACTATATTTTATTTTGGTATTTGAGCAGGTATAGTAGGAACCTCTTTAAGATTATTAATTCGTACTGAATTAGGTAATCCTGGATCTTTAATTG  
GAGATGATCAAATTTATAATACTATTGTAACAGCTCATGCTTTTATTATAATTTTTTTTATAGTTATACCAATTATAAATTGGAGGATTTGGAAATTG  
ATTAATTCCTTTAATATTAGGAGCCCCAGATATAGCTTTTCTCGAATAAATAATATAAGATTTTGATTACTACCCCTCTATTAACTTTATTAAAT  
TCTAGAAGAATTGTAGAAAATGGAGCAGGAACAGGATGAACAGTTTATCCCCCTTATCATCTAATATCGCTCATAGAGGTAGTTCAGTTGATTTAG  
CTATTTTTCTTTACATTTAGCAGGAATTCATCAATCTTAGGAGCTATTAATTTTATTACAACATTATTAAATATACGAATTAACCATATATCATT  
TGATCAAATACCTCTCTTTGTATGAGCAGTAGGAATTACTGCTTTACTTTTATTATTATCTTTACCTGTATTAGCTGGTGCTATTACTATATTATTA  
ACAGATCGAAATCTTAATACTTCATTTTTTGATCCTGCAGGAGGTGGAGATCCTATTTTATATCAACATTTA

GU947642\_Pmne\_ITNEB01\_Italy\_Sicily -----  
-----  
-----  
-----  
CCCCCTTCATTAACTTTATTAATTTCTAGAAGAATTGTAGAAAATGGAGCAGGAACGGATGAACAGTTTACCCCCCTTATCATCTAATATTGCTCA  
TAGAGGAAGTTAGTTGATTAGCTATTTTCTTACATTTAGCGGGAATTCATCAATCTTAGGAGCTATTAATTTTATTACAACATTATTATTAAT  
ATACGAATTAATCATATATCATTCGATCAAATACCTCTTTTGTATGAGCAGTAGGAATTACTGCTTTACTTTTATTATTATCTTTACCTGTATTAG  
CTGGTGCTATTACTATATTATTAACAGATCGAAATCTTAATACTTCATTTTTTGATCCCGCAGGAGGTGGTGATCCTATTTTATACCAACATTTA

EU093018\_Ca995 -----  
-----  
-----  
TTTTAATATTAGGAGCCCCAGATATAGCTTTTCTCGAATAAATAATATAAGATTTTGATTACTGCCCTCATTAACTTTATTAATTTCTAGAAGA  
ATTGTAGAAAATGGAGCAGGAACAGGATGAACAGTTTATCCCCCTTATCATCTAATATCGCTCATAGAGGTAGTTAGTTGATTAGCTATTTTTT  
CTTTACATTTAGCAGGAATTCATCAATCTTAGGAGCTATTAATTTTATTACAACATTATTAAATATACGAATTAACCATATATCATTTGATCAAAT  
ACCTCTCTTTGTATGAGCAGTAGGAATTACTGCTTTACTTTTATTATTATCTTTACCTGTATTAGCTGGTGCTATTACTATATTATTAACAGATCGA  
AATCTTAATACTTCATTTTTTGATCCTGCAGGAGGTGGAGATCCTATTTTATATCAACATTTA

EU093017\_Ch892 -----  
-----  
-----  
TTTTAATATTAGGAGCCCCAGATATAGCTTTCCCCCGAATAAATAATATAAGATTTTGATTACTACCCCTCATTAACTTTATTAATTTCTAGAAGA  
ATTGTAGAAAATGGAGCAGGAACAGGATGAACAGTTTACCCCTTATCATCTAATATTGCTCATAGAGGAAGTTAGTTGATTAGCTATTTTTT  
CCCTACATTTAGCGGGAATTCATCAATCTTAGGAGCTATTAATTTTATTACAACATTATTCAATATACGAATTAATCATATATCATTCGATCAAAT  
ACCTCTTTTGTATGAGCAGTAGGAATTACTGCTTTACTTTTATTATTATCTTTACCTGTATTAGCTGGTGCTATTACTATATTATTAACAGATCGA  
AATCTTAATACTTCATTTTTTGATCCAGCAGGAGGTGGTGATCCTATTTTATATCAACATTTA

EU093016\_Tk889 -----  
-----  
-----  
TTTTAATATTAGGAGCCCCAGATATAGCTTTTCTCGAATAAATAATATAAGATTTTGATTACTACCCCTCATTAACTTTATTAATTTCTAGAAGA  
ATTGTAGAAAATGGAGCAGGAACAGGATGAACAGTTTATCCCCCTTATCATCTAATATTGCTCATAGAATTAGTTAGTTGATTAGCTATTTTTT  
CTTTACATTTAGCAGGAATTCATCAATCTTAGGAGCTATTAATTTTATTACAACATTATTAAATATACGAATTAATCATTTATCATTTGATCAAAT

ACCCCTCTTTGTATGAGCAGTAGGAATTACTGCTTTACTTTTATTATTATCTTTACCTGTATTAGCTGGTGCTATTACTATATTATTAACAGATCGA  
AATCTTAATACTTCATTTTTTTGATCCTGCAGGAGGTGGAGATCCTATTTTATATCAACATTTA

EU093015\_It878 -----  
-----  
TTTAATATTAGGAGCCCCAGATATAGCTTTTCCCCGAATAAATAATATAAGATTTTGATTACTACCCCCCTCATTAACCTTTATTAATTTCTAGAAGA  
ATTGTAGAAAATGGAGCAGGAACAGGATGAACAGTTTATCCCCCTTTATCATCTAATATTGCTCATAGAGGAAGTTCAGTTGATTTAGCTATTTTTT  
CCTTACATTTAGCGGGAATTCATCAATCTTAGGAGCTATTAATTTTATTACAACATTATTATAATATACGAATTAATCATATATCATTTGATCAAAT  
ACCTCTTTTTGTATGAGCAGTAGGAATTACTGCTTTACTTTTATTATTATCTTTACCTGTATTAGCTGGTGCTATTACTATATTATTAACAGATCGA  
AATCTTAATACTTCATTTTTTTGATCCAGCAGGAGGTGGTGATCCTATTTTATACCAACATTTA

EU093014\_Hu875 -----  
-----  
TTTAATATTAGGAGCCCCAGATATAGCTTTTCCCTCGAATAAATAATATAAGATTTTGATTACTACCCCCCTCATTAACCTTTATTAATTTCTAGAAGA  
ATTGTAGAAAATGGAGCAGGAACAGGATGAACAGTTTATCCCCCTTTATCATCTAATATCGCTCATAGAGGTAGTTCAGTTGATTTAGCTATTTTTT  
CTTTACATTTAGCGGGAATTCATCAATCTTAGGAGCTATTAATTTTATTACAACATTATTATAATATACGAATTAACCATATATCATTTGATCAAAT  
ACCTCTCTTTGTATGAGCAGTAGGAATTACTGCTTTACTTTTATTATTATCTTTACCTGTATTAGCTGGTGCTATTACTATATTATTAACAGATCGA  
AATCTTAATACTTCATTTTTTTGATCCTGCAGGAGGTGGAGATCCTATTTTATATCAACATTTA

EU093013\_Sk872\_Cz\_Slova -----  
-----  
TTTAATATTAGGAGCCCCAGATATAGCTTTTCCCTCGAATAAATAATATAAGATTTTGATTACTACCCCCCTCATTAACCTTTATTAATTTCTAGAAGA  
ATTGTAGAAAATGGAGCAGGAACAGGATGAACAGTTTATCCCCCTTTATCATCTAATATCGCTCATAGAGGTAGTTCAGTTGATTTAGCTATTTTTT  
CTTTACATTTGGCAGGAATTCATCAATCTTAGGAGCTATTAATTTTATTACAACATTATTATAATATACGAATTAATCATATATCATTTGATCAAAT  
ACCTCTCTTTGTATGAGCAGTAGGAATTACTGCTTTACTTTTATTATTATCTTTACCTGTATTAGCTGGTGCTATTACTATATTATTAACAGATCGA  
AATCTTAATACTTCATTTTTTTGATCCTGCAGGAGGTGGAGATCCTATTTTATATCAACATTTA

EU093011\_Cz869 -----  
-----  
TTTAATATTAGGAGCCCCAGATATAGCTTTTCCCTCGAATAAATAATATAAGATTTTGATTACTACCCCCCTCATTAACCTTTATTAATTTCTAGAAGA  
ATTGTAGAAAATGGAGCAGGAACAGGATGAACAGTTTATCCCCCTTTATCATCTAATATTGCTCATAGAGGTAGTTCAGTTGATTTAGCTATTTTTT  
CTTTACATTTAGCAGGAATTCATCAATCTTAGGAGCTATTAATTTTATTACAACATTATTATAATATACGAATTAACCATATATCATTTGATCAAAT  
ACCTCTCTTTGTATGAGCAGTAGGAATTACTGCTTTACTTTTATTATTATCTTTACCTGTATTAGCTGGTGCTATTACTATATTATTAACAGATCGA  
AATCTTAATACTTCATTTTTTTGATCCTGCAGGAGGTGGAGATCCTATTTTATATCAACATTTA

EU093010\_Ru\_Bosnia\_Fi\_Bu\_Hu\_Bel\_Po\_Rom\_Ukr\_ -----  
-----  
TTTAATATTAGGAGCCCCAGATATAGCTTTTCCCTCGAATAAATAATATAAGATTTTGATTACTACCCCCCTCATTAACCTTTATTAATTTCTAGAAGA  
ATTGTAGAAAATGGAGCAGGAACAGGATGAACAGTTTATCCCCCTTTATCATCTAATATCGCTCATAGAGGTAGTTCAGTTGATTTAGCTATTTTTT  
CTTTACATTTAGCAGGAATTCATCAATCTTAGGAGCTATTAATTTTATTACAACATTATTATAATATACGAATTAACCATATATCATTTGATCAAAT  
ACCTCTCTTTGTATGAGCAGTAGGAATTACTGCTTTACTTTTATTATTATCTTTACCTGTATTAGCTGGTGCTATTACTATATTATTAACAGATCGA  
AATCTTAATACTTCATTTTTTTGATCCTGCAGGAGGTGGAGATCCTATTTTATATCAACATTTA

EU093009\_Kz848 -----  
-----  
TTTAATATTAGGGGCCCCAGATATAGCTTTTCCCTCGAATAAATAATATAAGATTTTGATTATTACCCCCCTCATTAACCTTTATTAATTTCTAGAAGA  
ATTGTAGAAAATGGAGCAGGAACAGGATGAACAGTTTATCCCCCTTTATCATCTAATATCGCTCATAGAGGTAGTTCAGTTGATTTAGCTATTTTTT  
CTTTACATTTAGCAGGAATTCATCAATCTTAGGAGCTATTAATTTTATTACAACATTATTATAATATACGAATTAATCATATATCATTTGATCAAAT  
ACCTCTCTTTGTATGAGCAGTAGGAATTACTGCTTTACTTTTATTATTATCTTTACCTGTATTAGCTGGTGCTATTACTATATTATTAACAGATCGA  
AATCTTAATACTTCATTTTTTTGATCCTGCAGGAGGTGGAGATCCTATTTTATATCAACATTTA

EU093007\_Fi810 -----  
-----  
TTTAATATTAGGAGCCCCAGATATAGCCTTTCCCTCGAATAAATAATATAAGATTTTGATTACTACCCCCCTCATTAACCTTTATTAATTTCTAGAAGA  
ATTGTAGAAAATGGAGCAGGAACAGGATGAACAGTTTATCCCCCTTTATCATCTAATATCGCTCATAGAGGTAGTTCAGTTGATTTAGCTATTTTTT  
CTTTACATTTAGCAGGAATTCATCAATCTTAGGAGCTATTAATTTTATTACAACATTATTATAATATACGAATTAATCATATATCATTTGATCAAAT  
ACCTCTCTTTGTATGAGCAGTAGGAATTACTGCTTTACTTTTATTATTATCTTTACCTGTATTAGCTGGTGCTATTACTATATTATTAACAGATCGA  
AATCTTAATACTTCATTTTTTTGATCCTGCAGGAGGTGGAGATCCTATTTTATATCAACATTTA

EU093004\_Tu999 -----  
-----  
TTTAATATTAGGAGCTCCAGATATAGCTTTTCCCTCGAATAAATAACATAAGATTTTGATTACTCCCCCTTCATTAACCTTTATTAATTTCTAGAAGA  
ATTGTAGAAAATGGAGCAGGAACAGGATGAACAGTTTATCCCCCTTTATCATCTAATATTGCTCATAGAGGTAGTTCAGTTGATTTAGCTATTTTTT  
CTTTACATTTAGCAGGAATTCATCAATCTTAGGAGCTATTAATTTTATTACAACATTATTATAATATACGAATTAATAATATATCATTTGATCAAAT  
ACCTCTTTTTGTATGAGCAGTAGGAATTACTGCATTACTTTTATTATTATCTTTACCTGTATTAGCTGGTGCTATTACTATATTATTAACAGATCGA  
AATCTTAATACTTCATTTTTTTGATCCCGCAGGAGGTGGAGATCCTATTTTATATCAACATTTA

EU093000\_Bu961 -----  
-----  
TTTAATATTAGGAGCCCCAGATATAGCTTTTCCCTCGAATAAATAATATAAGATTTTGATTACTACCCCCCTCATTAACCTTTATTAATTTCTAGAAGA  
ATTGTAGAAAATGGAGCAGGAACAGGATGAACAGTTTATCCCCCTTTATCATCTAATATCGCTCATAGAGGTAGTTCAGTTGATTTAGCTATTTTTT

EU092998\_Bu951

-----

-----

TTTAATATTAGGAGCCCCAGATATAGCTTTTTCCTCGAATAAATAATATAAGATTTTGATTACTACCCCCCTCATTAACCTTTATTAATTTCTAGAAGA  
ATTGTAGAAAATGGAGCAGGAACAGGATGAACAGTTTATCCCCCTTTATCATCTAATATCGCTCATAGTGGTAGTTTCAGTTGATTTAGCTATTTTTT  
CTTTACTTTTAGCAGGAATTTCAATCTTAGGAGCTATTAAATTTTATTACAACCTATTATTAATATACGAATTAACCATATATCATTTGATCAAA  
ACCTCTCTTTGTATGAGCAGTAGGAATTACTGCTTTACTTTTATTATCTTTTACCTGATTAGCTGGTGCTATTACTATATTTATTAACAGATCGA  
AACTCTTAATACCTTCATTTTGATCTCTGCAGGAGGTGGAGATCCTATTTTTATATCAACATTTA

EU092997\_Ru940

-----

-----

TTTAATATTAGGAGCCCCAGATATAGCTTTTCCTCGAATAAATAATATAAGATTTTGATTACTACCCCCCTCATTAACCTTTATTAATTTCTAGAAGA  
ATTGTAGAAAATGGAGCAGGAACAGGATGAACAGTTTATCCCCCTTTATCATCTAATATCGCTCATAGAGGTAGTTTCAGTTGATTTAGCTATTTTTT  
CTTTACTTTTAGCAGGAATTTTCATCAATCTTAGGAGCTATTAAATTTTATTACAACATATTATTAATATACGAATTAACCATATATCATTTGATCAAAT  
ACCTCTCTTTGTATGAGCAGTAGGAATTACTGCTTTACTTTTATTATTATCTCTACCTGTATTAGCTGGTGCTATTACTATATTATTAACAGATCGA  
AATCTTAATACTTCAATTTTGTACTCTGCAGGAGGTGGGGATCCTATTTTATCTATCAACATTATA

EU092996\_Sp924\_Fr

-----

-----

TTTAATATTAGGAGCCCCAGATATAGCTTTCCCCGAATAAATAATATAAGATTTTGATTACTACCCCTTCATTAACCTTATTAATTTCTAGAAGA  
ATTGTAGAAAATGGAGCAGGAACCTGGATGAACAGTTTACCCCTTTATCATCCAATATTGCTCATAGAGGAAGTTCAGTTGATTTAGCTATTTTTT  
CCCTACCTTTAGCAGGAATTTTCATCAATCTTAGGAGCTATTAAATTTATTACAACATGTTATTAATATACGAATTAATCATATATCATTCGATCAAAT  
ACCTCTTTTTGTGTGAGCAGTAAGGAATTACTGGTCTTTACTTTTATTATTACCTTACCTGTATTAGCTGGTGCTATTACTATATTATTAACAGATCGA  
AATCTTAATACTCTCAATTTTGATCTCAGCAGGAGGTGGTGATCTCTTTTATATCAACATTTA

EU092995\_Sp923

-----

-----

TTTAATATTAGGAGCCCCAGATATAGCTTTCCCCGAATAAATAATATAAGATTTTGATTACTACCCCTTCATTAACCTTATTAATTTCTAGAAGA  
ATTGTAGAAAATGGAGCAGGAACCTGGATGAACAGTTTATCCCCCTTTATCATCCAATATTGCTCATAGAGGAAGTTCAGTTGATTTAGCTATTTTTT  
CCCTACCTTTAGCGGGAATTTTCATCAATCTTAGGAGCTATTAAATTTTATTACAACATATTATTAATATACGAATTAATCATATATCATTCGATCAAAT  
ACCTCTTTTTGTGTGAGCAGTATGAAGAACTACTGCTTTACTTTTATTATTATCTTTATACCTGATTAGCTGGTGCTATTACTATATTATTAACGGATCGA  
AATCTTAATACTTCAATTTTGTATCCAGCAGGAGGTGGTGATCTCTTTTATATCAACATTTA

EU092994\_Sp921

-----

-----

TTTAATATTAGGAGCCCCAGATATAGCTTTCCCCGAATAAATAATATAAGATTTTGATTACTACCCCTTCATTAACCTTATTAATTTCTAGAAGA  
ATTGTAGAAAATGGAGCAGGAACCTGGATGAACAGTTTACCCCCCTTTATCATCCAATATTGCTCATAGAGGAAGTTCAGTTGATTTAGCTATTTTTT  
CCCTACCTTTAGCAGGAATTCATCAATCTTAGGAGCTATTAAATTTTATTACAACATGTTATTAATATACGAATTAATCATATATCATTCGATCAAAT  
ACCTCTTTTTGTGTGAGCAGTAGGAATTAAGTGGTTACTGTTCTTTATTTATTTATCTCTATTGATAGCTGGTGCTATTACTATATTTATTAACGGATCGA  
AATCTTAATACTTCATCTTTTGTATCCAGCAGGAGGTGGTGATCTCTATTTTATATCAACATTTA

EU092993\_Sp917

-----

-----

TTTAATATTAGGAGCCCCAGATATAGCTTTCCCCGAATAAATAATATAAGATTTTGATTACTACCCCTTCATTAACCTTATTAATTTCTAGAAGA  
ATTGTAGAAAATGGAGCAGGAACCTGGATGAACAGTTTATCCCCCTTTATCATCCAATATTGCTCATAGAGGAAGTTCAGTTGATTTAGCTATTTTTT  
CCCTACCTTTTAGCAGGAATTTTCATCAATCTTAGGAGCTATTAAATTTTATTACAACATTTATTAATATACGAATTAATCATATATCATTCGATCAAAT  
ACCTCTTTTTGTGTGAGCAGTAGGAATTACTGCTACTTTTATTATTAATCTCTTACCTGATTATAGCTGGTGCTATTACTATATTATTAACAGATCGA  
AATCTTAATACTCTCATTTTGTATCCAGCAGGAGGTGGTGATCTCTTTTATATCAACATTTA

EU092992\_Sp916

-----

-----

TTTAATATTAGGAGCCCCAGATATAGCTTTCCCCGAATAAATAATATAAGATTTTGATTACTACCCCTTCATTAACCTTATTAATTTCTAGAAGA  
ATTGTAGAAAATGGAGCAGGAACCTGGATGAACAGTTTACCCCCCTTTATCATCCAATATTGCTCATAGAGGAAGTTCAGTTGATTTAGCTATTTTTT  
CCCTACATTTAGCAGGAATTTTCATCAATCTTAGGAGCTATTAAATTTTATTACAACATTTATTAAATATACGAATTAATCATATATCATTCGATCAAAT  
ACCTCTTTTTGTGTGAGCAGTAGGAATTTACTGCTTACTCTTTTATTATTATCTTTACCTGTATTAGCTGGTGCTATTACTATATTATTAACAGATCGA  
AATATTAAATCTTCATTTTTTGATCCAGCAGGAGGTGGTGATCTCTTTTATTTATCAACATTTA

EU092991\_Fr913

-----

TTTAATATTAGGAGCCCCAGATATAGCTTTCCCCGAATAAATAATATAAGATTTTGATTACTACCCCTTCATTAACCTTATTAATTTCTAGAAGA  
ATTGTAGAAAATGGAGCAGGAACCTGGATGAACAATTTACCCCTTTATCATCCAATATTGCTCATAGAGGAAGTTCAGTTGATTAGCTATTTTTT  
CCCTACCTTTAGCAGGAATTTTCATCAATCTTAGGAGCTATTAATTTTATTACAACATTTATTAATATACGAATTAATCATATATCATTCGATCAAAT  
ACCTCTTTTGTGTGAGCAGTAGGAATTAAGTCTTTACTGCTTTTATTTATTAATCTTTACCTGATTAGCTGGTGCTATTACTATATTTATTAACGATCGA  
AATCTTAATACTCTCAATTTTGTATGCTCAGCAGGAGGTGGTGATCTCTTTATTTATCAACATTTA

EU092990\_Fr911

-----

-----

TTTAATATTAGGAGCCCCAGATATAGCTTTCCCCGGAATAAATAATATAAGATTTTGATTACTACCCCTTCATTAACCTTATTAATTTCTAGAAGA



EU092977\_At606\_At\_Cz\_D\_Fi\_Hu\_Po\_Slova

EU092976\_At602

EU092975\_D757

EU092974\_D756

EU092973\_D744

EU092971\_Hu697\_Bu\_Hu

EU092969\_Bu775

EU092968\_Bu772

EU093003\_D982



-----  
TTTAATATTAGGAGCCCCAGATATAGCTTTTCCTCGAATAAATAATATAAGATTTTGATTACTACCCCCCTCATTAACCTTTATTAATTTCTAGAAGA  
ATTGTAGAAAATGGAGCAGGAACAGGATGAACAGTTTATCCCCCTTTATCATCTAATATTGCTCATAGAGGTAGTTCAGTTGATTAGCTATTTTTT  
CTTTACATTTAGCAGGAATTTTCATCAATCTTAGGAGCTATTAATTTTATTACAACATTATTAATATACGAATTAACCATATATCATTTTGATCAAAT  
ACCTCTCTTTGTATGGGCAGTAGGAATTACTGCTTTACTTTTATTATTATCTTTACCTGTATTAGCTGGTGCATTACTATATTATTAACAGATCGA  
AATCTTAATACTTCATTTTTTGTATCCTGCGAGGAGTGGAGATCCTATTTTATATCAACATTTA

DQ407769\_UP\_100\_F  
ACATTATATTTTATTTTGGTATTTGAGCAGGTATAGTAGGAACCTCTTTAAGATTATTAATTCGTACTGAATTAGGTAATCCTGGATCTTTAATTG  
GAGATGATCAAATTTATAAATACTATTGTAACAGCTCATGCTTTTATTATAATTTTTTTTATAGTTTATACCAATTATAAATTGGAGGATTTGGAAATTG  
ATTAATTCCTTTAATATTAGGAGCCCCAGATATAGCTTTTCCCCGAATAAATAATATAAGATTTTGATTACTACCCCTTCATTAACCTTTATTAATT  
TCTAGAAGAATTGTAGAAAATGGAGCAGGAACAGGATGAACAGTTTACCCCCCTTTATCATCTAATATTGCTCATAGAGGAAGTTCAGTTGATTTAG  
CTATTTTTTCTTTACATTTAGCAGGAATTTTCATCAATCTTAGGAGCTATTAATTTTATTACAACATTATTAATATACGAATTAATCATATATCATT  
CGATCAAATACCTCTTTTTGTATGAGCAGTAGGAATTACTGCTTTACTCTTATTATTATCATTACCTGTATTAGCTGGTGCATTACTATATTATTA  
ACAGATCGAAATCTTAATACTTCATTTTTTGTATCCAGCAGGGGTGGTGA-----

AM231426\_W336\_parvisi\_Gre  
ACACTATATTTTATTTTGGTATTTGAGCAGGTATAGTAGGAACCTCTTTAAGATTATTAATTCGTACTGAATTAGGTAATCCTGGATCTTTAATTG  
GAGATGATCAAATTTATAAATACTATTGTAACAGCTCATGCTTTTATTATAATTTTTTTTATAGTTTATACCAATTATAAATTGGAGGATTTGGAAATTG  
ATTAATTCCTTTAATATTAGGAGCCCCAGATATAGCTTTTCTCGAATAAATAATATAAGATTTTGATTACTACCCCTTCATTAACCTTTATTAATT  
TCTAGAAGAATTG????????????????GGATGAACAGTTTATCCCCCTTTATCATCTAATATCGCTCATAGAGGTAGTTCAGTTGATTTAG  
CTATTTTTTCTTTACATTTAGCAGGAATTTTCATCAATCTTAGGAGCTATTAATTTTATTACAACATTATTAATATACGAATTAACCATATATCATT  
TGATCAAATACCTCTCTTTGTATGAGCAGTAGGAATTACTGCTTTACTTTTATTATTATCTTTACCTGTATTAGCTGGTGCATTACTATATTATTA  
ACAGATCGAAATCTTAATACTTCATTTTTTGTATCTGCGAGGAGTGGAGATCCTATTTTATATCAA-----

AM231425\_W333\_angorae\_Tur  
ACACTATATTTTATTTTGGTATTTGAGCAGGTATAGTAGGAACCTCTTTAAGATTATTAATTCGTACTGAATTAGGTAATCCTGGATCTTTAATTG  
GGGATGATCAAATTTATAAATACTATTGTAACAGCTCATGCTTTTATTATAATTTTTTTTATAGTTTATACCAATTATAAATTGGAGGATTTGGAAATTG  
ATTAATTCCTTTAATATTAGGAGCCCCAGATATAGCTTTTCTCGAATAAATAATATAAGATTTTGATTATACCCCTTCATTAACCTTTATTAATT  
TCTAGAAGAATTG????????????????GGATGAACAGTTTATCCCCCTTTATCATCTAATATTTCTCATAGAGGTAGTTCAGTTGATTTAG  
CTATTTTTTCTTTACATTTAGCAGGAATTTTCATCAATCTTAGGAGCTATTAATTTTATTACAACATTATTAATATACGAATTAATCATATATCATT  
TGATCAAATACCTCTCTTTGTATGAGCAGTAGGAATTACTGCTTTACTTTTATTATTATCTTTACCTGTATTAGCTGGTGCATTACTATATTATTA  
ACAGATCGAAATCTTAATACTTCATTTTTTGTATCTGCGAGGAGTGGAGATCCTATTTTATATCAA-----

AM231424\_W331\_angorae\_Tur\_Ankara  
ACACTATATTTTATTTTGGTATTTGAGCAGGTATAGTAGGAACCTCTTTAAGATTATTAATTCGTACTGAATTAGGTAATCCTGGATCTTTAATTG  
GAGATGATCAAATTTATAAATACTATTGTAACAGCTCATGCTTTTATTATAATTTTTTTTATAGTTTATACCAATTATAAATTGGAGGATTTGGAAATTG  
ATTAATTCCTTTAATATTAGGAGCCCCAGATATAGCTTTTCTCGAATAAATAATATAAGATTTTGATTATACCCCTTCATTAACCTTTATTAATT  
TCTAGAAGAATTG????????????????GGATGAACAGTTTATCCCCCTTTATCATCTAATATTTCTCATAGAGGTAGTTCAGTTGATTTAG  
CTATTTTTTCTTTACATTTAGCAGGAATTTTCATCAATCTTAGGAGCTATTAATTTTATTACAACATTATTAATATACGAATTAACCATATATCATT  
TGATCAAATACCTCTCTTTGTATGAGCAGTAGGAATTACTGCTTTACTTTTATTATTATCTTTACCTGTATTAGCTGGTGCATTACTATATTATTA  
ACAGATCGAAATCTTAATACTTCATTTTTTGTATCCTGCGAGGAGTGGAGATCCTATTTTATATCAA-----

AM231423\_W329\_gigantea\_Uzb\_Chatkai  
ACACTATATTTTATTTTGGTATTTGAGCAGGTATAGTAGGAACCTCTTTAAGATTATTAATTCGTACTGAATTAGGTAATCCTGGATCTTTAATTG  
GAGATGATCAAATTTATAAATACTATTGTAACAGCTCATGCTTTTATTATAATTTTTTTTATAGTTTATACCAATTATAAATTGGAGGATTTGGAAATTG  
ATTAATTCCTTTAATATTAGGAGCCCCAGATATAGCTTTTCTCGAATAAATAATATAAGATTTTGATTATACCCCTTCATTAACCTTTATTAATT  
TCTAGAAGAATTG????????????????GGATGAACAGTTTATCCCCCTTTATCATCTAATATCGCTCATAGAGGTAGTTCAGTTGATTTAG  
CTATTTTTTCTTTACATTTAGCAGGAATTTTCATCAATCTTAGGAGCTATTAATTTTATTACAACATTATTAATATACGAATTAATCATATATCATT  
TGATCAAATACCTCTCTTTGTATGAGCAGTAGGAATTACTGCTTTACTTTTATTACTATCTTTACCTGTATTAGCTGGTGCATTACTATATTATTA  
ACAGATCGAAATCTTAATACTTCATTTTTTGTATCCTGCGAGGAGTGGAGATCCTATTTTATATCAA-----

AM231422\_W330\_orientalis\_Zailiyskiy  
ACACTATATTTTATTTTGGTATTTGAGCAGGTATAGTAGGAACCTCTTTAAGATTATTAATTCGTACTGAATTAGGTAATCCTGGATCTTTAATTG  
GAGATGATCAAATTTATAAATACTATTGTAACAGCTCATGCTTTTATTATAATTTTTTTTATAGTTTATACCAATTATAAATTGGAGGATTTGGAAATTG  
ATTAATTCCTTTAATATTAGGGGCCCCAGATATAGCTTTTCTCGAATAAATAATATAAGATTTTGATTATACCCCTTCATTAACCTTTATTAATT  
TCTAGAAGAATTGTAGAAAATGGAGCAGGAACAGGATGAACAGTTTATCCCCCTTTATCATCTAATATCGCTCATAGAGGTAGTTCAGTTGATTTAG  
CTATTTTTTCTTTACATTTAGCGGGAATTTTCATCAATCTTAGGAGCTATTAATTTTATTACAACATTATTAATATACGAATTAATCATATATCATT  
TGATCAAATACCTCTCTTTGTATGAGCAGTAGGAATTACTGCTTTACTTTTATTACTATCTTTACCTGTATTAGCTGGTGCATTACTATATTATTA  
ACAGATCGAAATCTTAATACTTCATTTTTTGTATCCTGCGAGGAGTGGAGATCCTATTTTATATCAA-----

AM231421\_W292\_ochracea\_Tadj\_Zeravsh\_  
ACACTATATTTTATTTTGGTATTTGAGCAGGTATAGTAGGAACCTCTTTAAGATTATTAATTCGTACTGAATTAGGTAATCCTGGATCTTTAATTG  
GAGATGATCAAATTTATAAATACTATTGTAACAGCTCATGCTTTTATTATAATTTTTTTTATAGTTTATACCAATTATAAATTGGAGGATTTGGAAATTG  
ATTAATTCCTTTAATATTAGGAGCCCCAGATATAGCTTTTCTCGAATAAATAATATAAGATTTTGATTACTACCCCTTCATTAACCTTTATTAATT  
TCCAGAAGAATTGTAGAAAATGGAGCAGGAACAGGATGAACAGTTTATCCCCCTTTATCATCTAATATCGCTCATAGAGGTAGTTCAGTTGATTTAG  
CTATTTTTTCTTTACATTTAGCAGGAATTTTCATCAATCTTAGGAGCTATTAATTTTATTACAACATTATTAATATACGAATTAATCATATATCATT  
TGATCAAATACCTCTCTTTGTATGAGCAGTAGGAATTACTGCTTTACTTTTATTATTATCTTTACCTGTATTAGCTGGTGCATTACTATATTATTA  
ACAGATCGAAATCTTAATACTTCATTTTTTGTATCCTGCGAGGAGTGGAGATCCTATTTTATATCAA-----

AM231420\_W280\_farsica\_Iran\_Fars  
ACACTATATTTTATTTTGGTATTTGAGCAGGTATAGTAGGAACCTCTTTAAGATTATTAATTCGTACTGAATTAGGTAATCCTGGATCTTTAATTG  
GAGATGATCAAATTTATAAATACTATTGTAACAGCTCATGCTTTTATTATAATCTTTTTTATAGTTTATACCAATTATAAATTGGAGGATTTGGAAATTG  
ATTAATTCCTTTAATATTAGGAGCTCCAGATATAGCTTTTCCCCGAATAAATAATATAAGATTTTGATTACTCCCCCTTCATTAACCTTTATTAATT  
TCTAGAAGAATTGTAGAAAATGGAGCAGGAACAGGATGAACAGTTTATCCCCCTTTATCATCTAATATTGCCCCACAGAGGTAGTTCAGTTGATTTAG  
CTATTTTTTCTTTACATTTAGCAGGAATTTTCATCAATTTTAGGAGCTATTAATTTTATTACAACATTATTAATATACGAATTAATATATATCATT  
TGATCAAATACCTCTTTTTGTATGAGCAGTAGGAATTACAGCATTACTTTTATTATTATCTTTACCTGTATTAGCTGGTGCATTACTATATTATTA  
ACAGATCGAAATCTTAACACTTCATTTTTTGTATCCTGCA???GTGGGATCCTATTTTATATCAA-----

AM231419\_W311\_pseudonubilosus\_Iran\_Urmia  
ACACTATATTTTATTTTCGGTATTTTGAGCGGGTATAGTAGGAACCTCTTTAAGATTATTAATTCGTACTGAATTAGGTAATCCTGGATCTTTAATTG  
GAGATGATCAAATTTATAACACTATTGTAACAGCTCATGCTTTTATTATAATTTTTTTTATAGTTATACCAATTATAAATTGGAGGATTGGGAAATTG  
ATTAATTCCTTTAATATTAGGAGCTCCAGATATAGCTTTTCCTCGAATAAATAATATAAGATTTTGATTACTCCCCCTCATTAACCTTTATTAATT  
TCTAGAAGAATTGTAGAAAATGGAGCAGGAACAGGATGAACAATTTATCCCCCTTTATCATCTAATATTGCTCATAGAGGTAGTTCAGTTGATTTAG  
CTATTTTTCTTTTACATTTAGCAGGAATTTTCATCAATCTTAGGAGCTATTAATTTTATTACAACATATTGTCATAGAGGTAGTTCAGTTGATTTAG  
TGATCAAATACCTCTTTTGTATGAGCAGTAGGAATTACTGCATTACTTTTATTATTATCTTTACCTGTATTAGCTGGTGCATTACTATATTATTA  
ACAGATCGAAATCTTAATACTTCATTTTTTGATCTGCAGGA?GTGGAGATCCTATTTTATATCAA-----

AM231418\_W335\_sheljuzhkoi\_Tur\_Adana  
ACACTATATTTTATTTTGGTATTTTGAGCAGGTATAGTAGGAACCTCTTTAAGATTATTAATTCGTACTGAATTAGGTAATCCTGGATCTTTAATTA  
GAGATGATCAAATTTATAAATACTATTGTAACAGCTCATGCTTTTATTATAATTTTTTTTATAGTTATACCAATTATAAATTGGAGGATTGGGAAATTG  
ATTAATTCCTTTAATATTAGGAGCCCCAGATATAGCTTTTCCTCGAATAAATAATATAAGATTTTGATTACTCCCCCTTCATTAACCTTTATTAATT  
TCTAGAAGAATTG????????????GGATGAACAGTTTATCCCCCTTTATCATCTAATATTGCTCATAGAGGTAGTTCAGTTGATTTAG  
CTATTTTTCTTTACATTTAGCAGGAATTTTCATCAATCTTAGGAGCTATTAATTTTATTACAACATATTATTAATATACGAATTAATAATATATCATT  
TGATCAAATACCTCTTTTGTATGAGCAGTAGGAATTACTGCATTACTTTTATTATTATCCTTACCTGTATTAGCTGGTGCATTACTATATTATTA  
ACAGATCGAAATCTTAATACTTCATTTTTTGATCCCGCAGGAGGTGGAGATCCTATTTTATATCAA-----

AM231417\_W78\_parmenides\_Fr  
ACATTATATTTTATTTTGGTATTTTGAGCAGGTATAGTAGGAACCTCTTTAAGATTATTAATTCGTACTGAATTAGGTAATCCTGGATCTTTAATTG  
GAGATGATCAAATTTATAAATACTATTGTAACAGCTCATGCTTTTATTATAATTTTTTTTATAGTTATACCAATTATAAATTGGAGGATTGGGAAATTG  
ATTAATTCCTTTAATATTAGGAGCCCCAGATATAGCTTTTCCTCGAATAAATAATATAAGATTTTGATTACTACCCCTTCATTAACCTTTATTAATT  
TCTAGAAGAATTGTAGAAAATGGAGCAGGAACAGGATGAACAGTTTACCCCCCTTTATCATCTAATATTGCTCATAGAGGAAGTTCAGTTGATTTAG  
CTATTTTTCTTTACATTTAGCAGGAATTTTCATCAATCTTAGGAGCTATTAATTTTATTACAACATATTATTAATATACGAATTAATCATATATCATT  
CGATCAAATACCTCTTTTGTATGAGCAGTAGGAATTACTGCTTTACTCTTATTATTATCATTTACCTGTATTAGCTGGTGCATTACTATATTATTA  
ACAGATCGAAATCTTAATACTTCATTTTTTGATCCAGCAGGGGTGGTGCCTATTTTATATCAA-----

EU836682\_h\_1\_32\_Rus  
-----  
-----  
GCTTTTCCTCGAATAAATAATATAAGATTTTGATTACTACCCCTCATTAACCTTTATTAATTTCTAGAAGAATTGTAGAAAATGGAGCAGGAACAG  
GATGAACAGTTTATCCCCCTTTATCATCTAATATCGCTCATAGAGGTAGTTCAGTTGATTAGCTATTTTTCTTTACATTTAGCAGGAATTCATC  
AATCTTAGGAGCTATTAATTTTATTACAACATATTATTAATATACGAATTAACCATATATCATTTGATCAAATACCTCTCTTTGTATGAGCAGTAGGA  
ATTACTGCTTTACTTTTATTATTATCTTTACCTGTATTAGCTGGTGCATTACTATATTATTAACAGATCGAAATCTTAATACTTCATTTTTTGATC  
CTGCAGGAGGTGGGGATCCTATTTTATATCAACATTTA

EU836681\_h\_1\_31\_Rus  
-----  
-----  
GCTTTTCCTCGAATAAATAATATAAGATTTTGATTACTACCCCTCATTAACCTTTATTAATTTCTAGAAGAATTGTAGAAAATGGAGCAGGAACAG  
GATGAACAAATTTATCCCCCTTTATCATCTAATATCGCTCATAGAGGTAGTTCAGTTGATTAGCTATTTTTCTTTACATTTAGCAGGAATTCATC  
AATCTTAGGAGCTATTAATTTTATTACAACATATTATTAATATACGAATTAACCATATATCATTTGATCAAATACCTCTCTTTGTATGAGCAGTAGGA  
ATTACTGCTTTACTTTTATTATTATCTTTACCTGTATTAGCTGGTGCATTACTATATTATTAACAGATCGAAATCTTAATACTTCATTTTTTGATC  
CTGCAGGAGGTGGGGATCCTATTTTATATCAACATTTA

EU836680\_A\_Bo\_Bu\_Cr\_Cz\_Hu\_Sl\_Li\_Fi\_Po\_Ru  
-----  
-----  
GCTTTTCCTCGAATAAATAATATAAGATTTTGATTACTACCCCTCATTAACCTTTATTAATTTCTAGAAGAATTGTAGAAAATGGAGCAGGAACAG  
GATGAACAGTTTATCCCCCTTTATCATCTAATATCGCTCATAGAGGTAGTTCAGTTGATTAGCTATTTTTCTTTACATTTAGCAGGAATTCATC  
AATCTTAGGAGCTATTAATTTTATTACAACATATTATTAATATACGAATTAACCATATATCATTTGATCAAATACCTCTCTTTGTATGAGCAGTAGGA  
ATTACTGCTTTACTTTTATTATTATCTTTACCTGTATTAGCTGGTGCATTACTATATTATTAACAGATCGAAATCTTAATACTTCATTTTTTGATC  
CTGCAGGAGGTGGAGATCCTATTTTATATCAACATTTA

EU836675\_h\_1\_19\_It  
-----  
-----  
GCTTTCCCTCGAATAAATAATATAAGATTTTGATTACTACCCCTCATTAACCTTTATTAATTTCTAGAAGAATTGTAGAAAATGGAGCAGGAACAG  
GATGAACAGTTTATCCCCCTTTATCATCTAATATTGCTCATAGAGGTAGTTCAGTTGATTAGCTATTTTTCTTTACATTTAGCAGGAATTCATC  
AATCTTAGGAGCTATTAATTTTATTACAACATATTATTAATATACGAATTAACCATATATCATTTGATCAAATACCTCTCTTTGTATGAGCAGTAGGA  
ATTACTGCTTTACTTTTATTATTATCTTTACCTGTATTAGCTGGTGCATTACTATATTATTAACAGATCGAAATCTTAATACTTCATTTTTTGATC  
CTGCAGGAGGTGGAGATCCTATTTTATATCAACATTTA

EU836674\_h\_1\_18\_At\_It  
-----  
-----  
GCTTTTCCTCGAATAAATAATATAAGATTTTGATTACTACCCCTCATTAACCTTTATTAATTTCTAGAAGAATTGTAGAAAATGGAGCAGGAACAG  
GATGAACAGTTTATCCCCCTTTATCATCTAATATTGCTCATAGAGGTAGTTCAGTTGATTAGCTATTTTTCTTTACATTTAGCAGGAATTCATC  
AATCTTAGGAGCTATTAATTTTATTACAACATATTATTAATATACGAATTAACCATATATCATTTGATCAAATACCTCTCTTTGTATGAGCAGTAGGA  
ATTACTGCTTTACTTTTATTATTATCTTTACCTGTATTAGCTGGTGCATTACTATATTATTAACAGATCGAAATCTTAATACTTCATTTTTTGATC  
CTGCAGGAGGTGGAGATCCTATTTTATATCAACATTTA

EU836672\_h\_1\_10\_It  
-----  
-----  
GCTTTCCCTCGAATAAATAATATAAGATTTTGATTACTACCCCTCATTAACCTTTATTAATTTCTAGAAGAATTGTAGAAAATGGGGCAGGAACAG  
GATGAACAGTTTATCCCCCTTTATCATCTAATATCGCTCATAGAGGTAGTTCAGTTGATTAGCTATTTTTCTTTACATTTAGCAGGAATTCATC  
AATCTTAGGAGCTATTAATTTTATTACAACATATTATTAATATACGAATTAACCATATATCATTTGATCAAATACCTCTCTTTGTATGAGCAGTAGGA  
ATTACTGCTTTACTTTTATTATTATCTTTACCTGTATTAGCTGGTGCATTACTATATTATTAACAGATCGAAATCTTAATACTTCATTTTTTGATC  
CTGCAGGAGGTGGAGATCCTATTTTATATCAACATTTA

EU836671\_h\_1\_09\_It

-----

GCTTTTCCTCGAATAAAATAATAAGATTTTGATTACTACCCCTCATTAACCTTTATTAATTTCTAGAAGAATTGTAGAAAAATGGGGCAGGAACAG  
GATGAACAGTTTATCCCCCTTTATCATCTAATATCGCTCATAGAGGTAGTTCAGTTGATTTAGCTATTTTTCTTTACATTTAGCAGGAATTCATC  
AATCTTAGGAGCTATTAATTTTATTACAACATTTATTAATATACGAATTAACCATATATCATTTTGATCAAATACCTCTCTTTTGATAGCAGTAGGA  
ATTACTGCTTACTTTTATTTATTATTCTTTACCTGTATTAGCTGGTGCTATTACTATATTATTAAACAGATCGAAATCTTAATACTTCATTTTTTGATC  
CTGCAGGAGGTGGAGATCTATTTTATATCAACATTTA

EU836670\_h\_1\_07\_Gre

-----

-----

GCTTTTCCTCGAATAAAATAATATAAGATTTTGATTACTACCCCTCATTAACCTTTATTAATTTCTAGAAGAATTGTAGAAAAATGGAGCAGGAACAG  
GATGAACAATTTATCCCCCTTTATCATCTAATATCGCTCATAGAGGTAGTTCAGTTGATTAGCTATTTTTCTTTACATTTAGCAGGAATTTTCATC  
AATCTTAGGGGCTATTAATTTTATTACAACATATTATTAATATACGAATTAACCATATATCATTTGATCAAATACCTCTCTTTGTATGAGCAGTAGGA  
ATTACTGCGTTTACCTTTTATTATTATCTTTACCTGTATTAGCTGGTGCTATTACTATATTTATTAACAGATCGAAATCTTAATACTTCATTTTTTGATC  
CTGACGGTTGGAGGATCATCTTTTATTTACCAACATTTA

EU836669\_h\_1\_06\_Gre

-----

-----

GCTTTCCTCGAATAAATAATATAAGATTTTGATTACTACCCCTCATTAACTTTATTAATTCTAGAAGAATTGTAGAAAATGGAGCAGGAACAG  
GATGAACAGTTTATCCCCCTTATCATCTAATATAGCTCATAGAGGTAGTTCAGTTGATTTAGCTATTTTTCTTTACATTTAGCAGGAATTTTCATC  
AATCTTAGAGCTATTAATTTTATTACAACATATTATTAATATACGAATTAACCATATATCATTTGATCAAATACCTCTCTTTGTATGAGCAGTAGGA  
ATTACTGCTTTACTTTTATTATTATCTTTACCTGTATTCTGGTGCTATTACTATATTATTAACAGATCGAAATCTTAATACTTCTATTTTGTATC  
CTGACGGAGTGGGAGCTATTTTATTTATCAACATTATA

EU836668\_h\_1\_05\_Gre

-----

-----

GCTTTCCTCGAATAAATAATATAAGATTTTGATTACTACCCCCCTCATTAACCTTTATTAATTTCTAGAAGAATTGTAGAAAAATGGAGCAGGAACAG  
GATGAACAGTTTATCCCCCTTTATCATCTAATATCGCTCATAGAGGTAGTTCAGTTGATTTAGCTATTTTTCTTTACATTTAGCAGGAATTTTCATC  
AATCTTAGGGGCTATTAATTTTATTACAACATATTATTAATATACGAATTAACCATATATCATTTGATCAAATACCTCTCTTTGTATGAGCAGTAGGA  
ATTACTGCGTTTACTTTTATTATTATCTTTACCTGTATTCTGCTGGTGCTATTACTATATTATTAACAGATCGAAATCTTAATACCTTCATTTTTTGATC  
CTCAGGAGGTGGAGATCTATTTTATTTATCAACATTATA

EU836667\_h\_1\_04\_Gre

-----

-----

GCTTTCCTCGAATAAATAATATAAGATTTTGATTACTACCCCCCTCATTAACCTTTATTAAATTTCTAGAAGAATTGTAGAAAAATGGAGCAGGAACAG  
GATGAACAGTTTATCCCCCTTTATCATCTAATATCGCTCATAGAGGTAGTTCAGTTGATTTAGCTATTTTTCTTTACATTTAGCAGGAATTTTCATC  
AATCTTAGGGGCTATTAATTTATTACAACATTTATTAAATATACGAATTAACCATATATCATTTGATCAAATACCTCTCTTTGTATGAGCAGTAGGA  
ATTACTCGCTTTATCTTTATTATTATCTTTACCCGTATTAGCTGGTGCTATTGATCTATATTTATTAACAGATCGAAATCTTAATCTTCATTTTTTGATC  
CTCGAGGTTGGAGGATCTTTTATTATCAACATTTA

EU836666\_h\_1\_03\_Mac

-----

-----

GCTTTTCCTCGAATAAATAATATAAGATTTTGATTACTACCCCCCTCATTAACTTTATTAAATTCTAGAAGAATTGTAGAAAATGGAGCAGGAACAG  
GATGAACAGTTTATCCCCCTTTATCATCTAATATCGCTCATAGAGGTAGTTCAGTTGATTTAGCTATTTTTCTTTACATTTAGCGGGAATTTTCATC  
AATCTTAGGGGCTATTAATTTTATTACAACATATTATTAATATACGAATTAACCATATATCATTTGATCAAATACCTCTCTTTGTATGAGCAGTAGGA  
ATTACTGCGTTTACTTTTATTATTATCTTTACCTGTATTACCTGGTGATTACTATATTATTAACAGATCGAAATCTTAATACCTTCATTTTTTGATC  
CTGCAGGAGTGGAGTATCTATTTTATCATATCAACATTAA

EU836665\_h\_1\_02\_Gre\_Mac

-----

-----

GCTTTTCCTCGAATAAATAATATAAGATTTTGATTACTACCCCTCATTAACTTTATTAAATTCTAGAAGAATTGTAGAAAATGGAGCAGGAACAG  
GATGAACAGTTTATCCCCCTTTATCATCTAATATCGCTCATAGAGGTAGTTCAGTTGATTTAGCTATTTTTCTTTACATTTAGCAGGAATTTTCATC  
AATCTTAGGGGCTATTAATTTTATTACAACATTTATTAATATACGAATTAACCATATATCATTTGATCAAATACCTCTCTTTGTATGAGCAGTAGGA  
ATTACTGCTTACCTTTTATTATTATCTTTACCTGTATTAGCTGGTGATTATTTATTAACAGATCGAAATCTTAATCTTACATTTTGTATC  
CTGCAGGTGGTGGAGATCTTTTATTAATCATCAACATTTA

EU836664\_h2\_06\_At\_It

-----

-----

GCTTTTCCTCGAATAAATAATATAAGATTTTGATTGCTACCCCTCATTAACTTTATTAATTCTAGAAGAATTGTAGAAAATGGAGCAGGAACAG  
GATGAACAGTTTATCCCCCTTTATCATCTAATATCGCTCATAGAGGTAGTTCAGTTGATTTAGCTATTTTTCTTTACATTTAGCAGGAATTTTCATC  
AATCTTAGAGCTATTAATTTTATTACAACATTTATTAATATACGAATTAACCATATATCATTTGATCAAATACCTCTCTTTGTATGAGCAGTAGGA  
ATTACTGCTTTACGTTTATTATTATCTTTACCTGTATTACGTTGGTGATTACTATATTATTAACAGATCGAAATCTTAATACTTCATTTTTTGATC  
CTGCAGGAGTGGAGATCTATTTTATATCAACATTTA

EU836663\_h\_2\_05\_It

-----

GCTTTCCCTCGAATAAATAATATAAGATTTTGATTGCTACCCCCCTCATTAACTTTATTAATTTCTAGAAGAATTGTAGAAAAATGGAGCAGGAACAG  
GATGAACAGTTTATCCCTCTTTATCATCTAATATCGCTATAGAGGTAGTTCAGTTGATTTAGCTATTTTTCTTTACATTTAGCAGGAATTTTCATC  
AATCTTAGGAGCTATTAATTTTATACACTATTATTAATATACGAATTAACCATATATCATTTTGATCAAATACCTCTCTTTGTATGAGCAGTAGGA

ATTACTGCTTTACTTTTATTATTATCTTTACCTGTATTAGCTGGTGCTATTACTATATTATTAACAGATCGAAATCTTAATACTTCATTTTTTGATC  
CTGCAGGAGGTGGAGATCCTATTTTATATCAACATTTA;

```

END;
begin mrbayes;
    set autoclose=yes nowarn=yes;
    partition ancstates = 2: 1, 2-655;
    set partition=ancstates;
    lset applyto=(2) rates=invgamma nst=6;
    unlink statefreq=(all) revmat=(all) shape=(all) pinvar=(all);
    prset ratepr=variable;
    constraint mnemosyne_clade=LOWAM001_Kyrgyzstan_Alai_10 LOWAM004_Uzbekistan_Gissar_38
LOWAM007_Kyrgyzstan_TianShan24 LOWAM009_Kyrgyzstan_TianShan_6 LOWAM013_Turkey_Georgia_3
LOWAM014_Turkey_Ovitdagi_1 LOWAM015_Don_Borisovka_Saratov LOWAM018_Kyrgyzstan_Karamyk
LOWAM019_Kyrgyzstan_Karamyk LOWAM021_Russia_Saratov LOWAM023_Saratov_Luga_Vologda_4
LOWAM027_Kazakhstan_Karatau_2 LOWAM037_Russia_Pskovskaya LOWAM038_Kyrgyzstan_Tjuz_Ashu_3
LOWAM039_Kyrgyzstan_23 LOWAM044_Russia_Borisovra_3 LOWAM045_Tajikistan_Shakhristan_3
LOWAM067_Kazakhstan_Kaindy_1 LOWAM069_Russia_Teberda_2 LOWAM073_Kyrgyzstan_Takhtalyk1
LOWAM074_Kyrgyzstan_Naryntoo LOWAM086_Turkmenistan_3 LOWAM087_Uzbekistan_Sarchashma
LOWAM095_Kyrgyzstan_Sosnovka LOWAM096_Gissar_5 LOWAM098_Tajikistan_Khondizal
LOWAM099_Uzbekistan_Kamchik_2 LOWAM100_Kyrgyzstan_Konduk LOWAM115_Azerbaijan_Nyus_Nyus
LOWAM116_Iran_Dizin_2 LOWAM122_Russia_Saratow_1 LOWAM136_Uzbekistan_Tamshush_1
LOWAM149_Kyrgyzstan_Songkel_1 LOWAM198_Turkey_Aladaglar_2 LOWAM213_Tajikistan_Tandukul_1
Parnassius_ariadne_ariadne Parnassius_ariadne_AC4_14 HQ004911 RV_07 C107 Romania
HQ004908 RV_07 D060 Romania HQ004907 RV_08 M274 Romania HQ004902 RV_08 M361 Romania
GU947642 Pmne ITNEB01 Italy Sicily EU093018 Ca995 EU093017 Ch892 EU093016 Tk889 EU093015 It878
EU093014 Hu875 EU093013 Sk872 Cz_Slova EU093011 Cz869 EU093010 Ru_Bosnia_Fi_Bu_Hu_Bel_Po_Rom_Ukr_
EU093009 Kz848 EU093007 Fi810 EU093004 Tu999 EU093000 Bu961 EU092998 Bu951 EU092997 Ru940
EU092996 Sp924 Fr EU092995 Sp923 EU092994 Sp921 EU092993 Sp917 EU092992 Sp916 EU092991 Fr913
EU092990 Fr911 EU092988 It639 EU092987 Fr528 EU092985 Fr525 EU092984 Fr522 EU092983 Ch765
EU092982 Pl653 Slova_Ukr EU092981 At626 EU092980 At622 EU092978 At618 At_Slo
EU092977 At606 At_Cz_D_Fi_Hu_Po_Slova EU092976 At602 EU092975 D757 EU092974 D756 EU092973 D744
EU092971 Hu697 Bu_Hu EU092969 Bu775 EU092968 Bu772 EU093003 D982 DQ407769 UP_100_F
AM231426 W336 parvisi Gre AM231425 W333 angorae Tur AM231424 W331 angorae Tur Ankara
AM231423 W329 gigantea Uzb Chatkal AM231422 W330 orientalis Zailiyskiy
AM231421 W292 ochracea Tadj Zeravsh AM231420 W280 farsica Iran Fars
AM231419 W311 pseudonubilosus Iran Urmia AM231418 W335 sheljuzhkoi Tur Adana
AM231417 W78 parmenides Fr EU836682 h_1_32 Rus EU836681 h_1_31 Rus
EU836680 A_Bo_Bu_Cr_Cz_Hu_Sl_Li_Fi_Po_Ru EU836675 h_1_19 It EU836674 h_1_18 At_It
EU836672 h_1_10 It EU836671 h_1_09 It EU836670 h_1_07 Gre EU836669 h_1_06 Gre EU836668 h_1_05 Gre
EU836667 h_1_04 Gre EU836666 h_1_03 Mac EU836665 h_1_02 Gre_Mac EU836664 h_2_06 At_It
EU836663 h_2_05 It;
    prset topologypr=constraints(mnemosyne_clade);
    report applyto=(1) ancstates=yes;
    mcmc ngen= 100000 relburnin=yes burninfrac=0.25 printfreq=100 samplefreq=100 nchains=4
savebrlens=yes;
    mcmc;
    sump;
end;

```

## Alignment and command block for reconstruction of the ancestral states in the clade (2) [(*mnemosyne* +*ariadne*)+(*stubbendorffii*+*glacialis*+*hoenei*)]

#NEXUS

```

BEGIN DATA;
    DIMENSIONS NTAX=125 NCHAR=655;
    format datatype=mixed(standard:1,DNA:2-655) interleave=yes gap=- missing=?;
    MATRIX
Parnassius_orleans_AC10_5 0
LOWAM001_Kyrgyzstan_Alai_10 1
LOWAM004_Uzbekistan_Gissar_38 1
LOWAM007_Kyrgyzstan_TianShan24 1
LOWAM009_Kyrgyzstan_TianShan_6 1
LOWAM013_Turkey_Georgia_3 1
LOWAM014_Turkey_Ovitdagi_1 1
LOWAM015_Don_Borisovka_Saratov 1
LOWAM018_Kyrgyzstan_Karamyk 1
LOWAM019_Kyrgyzstan_Karamyk 1
LOWAM021_Russia_Saratov 1
LOWAM023_Saratov_Luga_Vologda_4 1
LOWAM027_Kazakhstan_Karatau_2 1

```

|                                             |   |
|---------------------------------------------|---|
| LOWAM037_Russia_Pskovskaya                  | 1 |
| LOWAM038_Kyrgyzstan_Tjuz_Ashu_3             | 1 |
| LOWAM039_Kyrgyzstan_23                      | 1 |
| LOWAM044_Russia_Borisovra_3                 | 1 |
| LOWAM045_Tajikistan_Shakhristan_3           | 1 |
| LOWAM067_Kazakhstan_Kaindy_1                | 1 |
| LOWAM069_Russia_Teberda_2                   | 1 |
| LOWAM073_Kyrgyzstan_Takhtalyk1              | 1 |
| LOWAM074_Kyrgyzstan_Naryntoo                | 1 |
| LOWAM086_Turkmenistan_3                     | 1 |
| LOWAM087_Uzbekistan_Sarchashma              | 1 |
| LOWAM095_Kyrgyzstan_Sosnovka                | 1 |
| LOWAM096_Gissar_5                           | 1 |
| LOWAM098_Tajikistan_Khondizal               | 1 |
| LOWAM099_Uzbekistan_Kamchik_2               | 1 |
| LOWAM100_Kyrgyzstan_Konduk                  | 1 |
| LOWAM115_Azerbaijan_Nyus_Nyus               | 1 |
| LOWAM116_Iran_Dizin_2                       | 1 |
| LOWAM122_Russia_Saratow_1                   | 1 |
| LOWAM136_Uzbekistan_Tamshush_1              | 1 |
| LOWAM149_Kyrgyzstan_Songkel_1               | 1 |
| LOWAM198_Turkey_Aladaglar_2                 | 1 |
| LOWAM213_Tajikistan_Tandukul_1              | 1 |
| Parnassius_clodius                          | 0 |
| Parnassius_eversmanni_2005_LOWA_108         | 0 |
| Parnassius_eversmanni_2005_LOWA_107         | 0 |
| Parnassius_stubbendorffii_2005_LOWA_815     | 1 |
| Parnassius_stubbendorffii_2005_LOWA_154     | 1 |
| Parnassius_stubbendorffii_2005_LOWA_153     | 1 |
| Parnassius_nordmanni                        | 0 |
| Parnassius_eversmanni                       | 0 |
| Parnassius_eversmanni_felderi               | 0 |
| Parnassius_ariadne_ariadne                  | 0 |
| Parnassius_glacialis_mikado                 | 1 |
| Parnassius_stubbendorffii_hoenei            | 1 |
| Parnassius_stubbendorffii_hoenei_AC20_16    | 1 |
| Parnassius_stubbendorffii_koreanus          | 1 |
| Parnassius_nordmanni_AC20_5                 | 0 |
| Parnassius_eversmanni_felderi_AC23_68       | 0 |
| Parnassius_eversmanni_eversmanni_AC1_14     | 0 |
| Parnassius_clodius_AC4_5                    | 0 |
| Parnassius_ariadne_AC4_14                   | 0 |
| HQ004911_RV_07_C107_Romania                 | 1 |
| HQ004908_RV_07_D060_Romania                 | 1 |
| HQ004907_RV_08_M274_Romania                 | 1 |
| HQ004902_RV_08_M361_Romania                 | 1 |
| GU947642_Pmne_ITNEB01_Italy_Sicily          | 1 |
| EU093018_Ca995                              | 1 |
| EU093017_Ch892                              | 1 |
| EU093016_Tk889                              | 1 |
| EU093015_It878                              | 1 |
| EU093014_Hu875                              | 1 |
| EU093013_Sk872_Cz_Slova                     | 1 |
| EU093011_Cz869                              | 1 |
| EU093010_Ru_Bosnia_Fi_Bu_Hu_Bel_Po_Rom_Ukr_ | 1 |
| EU093009_Kz848                              | 1 |
| EU093007_Fi810                              | 1 |
| EU093004_Tu999                              | 1 |
| EU093000_Bu961                              | 1 |
| EU092998_Bu951                              | 1 |
| EU092997_Ru940                              | 1 |
| EU092996_Sp924_Fr                           | 1 |
| EU092995_Sp923                              | 1 |
| EU092994_Sp921                              | 1 |
| EU092993_Sp917                              | 1 |
| EU092992_Sp916                              | 1 |
| EU092991_Fr913                              | 1 |
| EU092990_Fr911                              | 1 |
| EU092988_It639                              | 1 |
| EU092987_Fr528                              | 1 |
| EU092985_Fr525                              | 1 |
| EU092984_Fr522                              | 1 |
| EU092983_Ch765                              | 1 |
| EU092982_Pl653_Slova_Ukr                    | 1 |
| EU092981_At626                              | 1 |
| EU092980_At622                              | 1 |
| EU092978_At618_At_Slo                       | 1 |
| EU092977_At606_At_Cz_D_Fi_Hu_Po_Slova       | 1 |
| EU092976_At602                              | 1 |
| EU092975_D757                               | 1 |

|                                          |   |
|------------------------------------------|---|
| EU092974_D756                            | 1 |
| EU092973_D744                            | 1 |
| EU092971_Hu697_Bu_Hu                     | 1 |
| EU092969_Bu775                           | 1 |
| EU092968_Bu772                           | 1 |
| EU093003_D982                            | 1 |
| DQ407769_UP_100_F                        | 1 |
| AM231426_W336_parvisi_Gre                | 1 |
| AM231425_W333_angorae_Tur                | 1 |
| AM231424_W331_angorae_Tur_Ankara         | 1 |
| AM231423_W329_gigantea_Uzb_Chatkal       | 1 |
| AM231422_W330_orientalis_Zailiyskiy      | 1 |
| AM231421_W292_ochracea_Tadj_Zeravsh      | 1 |
| AM231420_W280_farsica_Iran_Fars          | 1 |
| AM231419_W311_pseudonubilosus_Iran_Urmia | 1 |
| AM231418_W335_sheljuzhkoi_Tur_Adana      | 1 |
| AM231417_W78_parmenides_Fr               | 1 |
| EU836682_h_1_32_Rus                      | 1 |
| EU836681_h_1_31_Rus                      | 1 |
| EU836680_A_Bo_Bu_Cr_Cz_Hu_Sl_Li_Fi_Po_Ru | 1 |
| EU836675_h_1_19_It                       | 1 |
| EU836674_h_1_18_At_It                    | 1 |
| EU836672_h_1_10_It                       | 1 |
| EU836671_h_1_09_It                       | 1 |
| EU836670_h_1_07_Gre                      | 1 |
| EU836669_h_1_06_Gre                      | 1 |
| EU836668_h_1_05_Gre                      | 1 |
| EU836667_h_1_04_Gre                      | 1 |
| EU836666_h_1_03_Mac                      | 1 |
| EU836665_h_1_02_Gre_Mac                  | 1 |
| EU836664_h_2_06_At_It                    | 1 |
| EU836663_h_2_05_It                       | 1 |

#### Parnassius\_orleans\_AC10\_5

-----  
TGAGCAGGTATAATAGGAACCTCTTTAAGATTATTAATTCGTACTGAATTAGGTAATCCTGGATCTTTAATTGGAGATGATCAAATTTATAACACTA  
TTGTAACAGCTCATGCTTTTATTATAATTTTTTTTATAGTTATACCAATTATAAATTGGAGGATTTGGAAATTGATTAAATCCATTAAATATTAGGAGC  
CCCAGATATAGCTTTCCCGCGAATAAATAATATAAGATTTTGACTATTACCCCCCTCATTAACTTATTAATTTCCAGAAGAATCGTAGAAAATGGA  
GCAGGAACCTGGATGAACAGTTTATCCCCCTTTATCCTCTAATATTGCCCATAGTGGAAGATCAGTTGATTAGCTATCTTTTCTTTACATTTAGCTG  
GAATTTTCATCTATTTTAGGAGCTATTAATTTTATTACAACATATTATTAATACGAATTAATCATATATCATTTGATCAAATACCCCTTTTCGTATG  
AGCAGTAGGAATTACTGCTTTACTTTTATTATTATCTTTACCTGTTTTAGCAGGTGCTATTACTATACCTTCTTACAGATCGAAATCTTAATACTTCA  
TTTTTTGATCCAGCAGGAGGTGGAGATCCTATTTTATACCAACATTTA

#### LOWAM001\_Kyrgyzstan\_Alai\_10

ACACTATATTTTATTTTGGTATTTGAGCAGGTATAGTAGGAACCTCTTTAAGATTATTAATTCGTACTGAATTAGGTAATCCTGGATCTTTAATTG  
GAGATGATCAAATTTATAAATACTATTGTAACAGCTCATGCTTTTATTATAATTTTTTTCATAGTTATACCAATTATAAATTGGAGGATTTGGAAATTG  
ATTAATTCCTTTAATATTAGGAGCCCCAGATATAGCTTTTCTCGAATAAATAATATAAGATTTTGATTACTACCCCTTCATTAACTTTATTAATT  
TCTAGAAGAATTGTAGAAAATGGAGCAGGAACAGGATGAACAGTTTATCCCCCTTTATCATCTAATATCGCTCATAGAGGTAGTTCAGTTGATTTAG  
CTATTTTTTCTTTACATTTAGCAGGAATTTTCATCAATTTTAGGAGCTATTAATTTTCATTACAACATTTATTAATATACGAATTAACCATATATCATT  
TGATCAAATACCCCTCTTTGTATGAGCAGTAGGAATTACTGCTTTACTTTTATTATTATCTTTACCTGTATTAGCTGGTGCATTACTATATTATTA  
ACAGATCGAAATCTTAATACTTCATTTTTTGATCCTGCAGGAGGTGGAGATCCTATTTTATATCAACATTTA

#### LOWAM004\_Uzbekistan\_Gissar\_38

ACACTATATTTTATTTTGGTATTTGAGCAGGTATAGTAGGAACCTCTTTAAGATTATTAATTCGTACTGAATTAGGTAATCCTGGATCTTTAATTG  
GAGATGATCAAATTTATAAATACTATTGTAACAGCTCATGCTTTTATTATAATTTTTTTCATAGTTATACCAATTATAAATTGGAGGATTTGGAAATTG  
ATTAATTCCTTTAATATTAGGAGCCCCAGATATAGCTTTTCTCGAATAAATAATATAAGATTTTGATTACTACCCCTTCATTAACTTTATTAATT  
TCCAGAAGAATTGTAGAAAATGGAGCAGGAACAGGATGAACAGTTTATCCCCCTTTATCATCTAATATCGCTCATAGAGGTAGTTCAGTTGATTTAG  
CTATTTTTTCTTTACATTTAGCAGGAATTTTCATCAATTTTAGGAGCTATTAATTTTCATTACAACATTTATTAATATACGAATTAACCATATATCATT  
TGATCAAATACCCCTCTTTGTATGAGCAGTAGGAATTACTGCTTTACTTTTATTATTATCTTTACCTGTATTAGCTGGTGCATTACTATATTATTA  
ACAGATCGAAATCTTAATACTTCATTTTTTGATCCTGCAGGAGGTGGAGATCCTATTTTATATCAACATTTA

#### LOWAM007\_Kyrgyzstan\_TianShan24

ACACTATATTTTATTTTGGTATTTGAGCAGGTATAGTAGGAACCTCTTTAAGATTATTAATTCGTACTGAATTAGGTAATCCTGGATCTTTAATTG  
GAGATGATCAAATTTATAAATACTATTGTAACAGCTCATGCTTTTATTATAATTTTTTTCATAGTTATACCAATTATAAATTGGAGGATTTGGAAATTG  
ATTAATTCCTTTAATATTAGGGGCCCCAGATATAGCTTTTCTCGAATAAATAATATAAGATTTTGATTATTACCCCTTCATTAACTTTATTAATT  
TCTAGAAGAATTGTAGAAAATGGAGCAGGAACAGGATGAACAGTTTATCCCCCTTTATCATCTAATATCGCTCATAGAGGTAGTTCAGTTGATTTAG  
CTATTTTTTCTTTACATTTAGCAGGAATTTTCATCAATCTTAGGAGCTATTAATTTTATTACAACATTTATTAATATACGAATTAATCATATATCATT  
TGATCAAATACCTCTCTTTGTATGAGCAGTAGGAATTACTGCTTTACTTTTATTATTATCTTTACCTGTATTAGCTGGTGCATTACTATATTATTA  
ACAGATCGAAATCTTAATACTTCATTTTTTGATCCTGCAGGAGGTGGAGATCCTATTTTATATCAACATTTA

#### LOWAM009\_Kyrgyzstan\_TianShan\_6

ACACTATATTTTATTTTGGTATTTGAGCAGGTATAGTAGGAACCTCTTTAAGATTATTAATTCGTACTGAATTAGGTAATCCTGGATCTTTGATTG  
GAGATGATCAAATTTATAAATACTATTGTAACAGCTCATGCTTTTATTATAATTTTTTTCATAGTTATACCAATTATAAATTGGAGGATTTGGAAATTG  
ATTAATTCCTTTAATATTAGGGGCCCCAGATATAGCTTTTCTCGAATAAATAATATAAGATTTTGATTATTACCCCTTCATTAACTTTATTAATT  
TCTAGAAGAATTGTAGAAAATGGAGCAGGAACAGGATGAACAGTTTATCCCCCTTTATCATCTAATATCGCTCATAGAGGTAGTTCAGTTGATTTAG  
CTATTTTTTCTTTACATTTAGCAGGAATTTTCATCAATCTTAGGAGCTATTAATTTTATTACAACATTTATTAATATACGAATTAATCATATATCATT  
TGATCAAATACCTCTCTTTGTATGAGCAGTAGGAATTACTGCTTTACTTTTATTACTATCTTTACCTGTATTAGCTGGTGCATTACTATATTATTA  
ACAGATCGAAATCTTAATACTTCATTTTTTGATCCTGCAGGAGGTGGAGATCCTATTTTATATCAACATTTA

#### LOWAM013\_Turkey\_Georgia\_3

ACACTATATTTTATTTTGGTATTTGAGCAGGTATAGTAGGAACCTCTTTAAGATTATTAATTCGTACTGAATTAGGTAATCCTGGATCTTTAATTG

TTTATTTTGGTATTGAGCAGGATATAGTAGGAACCTCTTTAAGATTATTAATTCGTACTGAATTAGGTAATCCTGGATCTTTAATTGGAGATGATC  
AAATTATAATACTATCTGTAAACAGCTCATGCTTTTATTATTAATTTTTTATAGTTATACCAAAATTATAATTGGAGGATTGGAAAATTGTTAATTC  
TTTAAATATTAGGAGCCCCAGATATAGCTTTTCTCGAATAAATAATAGAGTTTGTATTACTACCCCTCATTAACCTTTTAAATTTCTAGAAGA  
ATTGTAGAAAATTGGAGCAGGAACAGGATGAACAGTTTATCCCCCTTATCATCTAATACGCTCATAGAGGTAGTTCAGTTGATTAGCTAATTTTT  
CTTTACTTTAGCAGGAATTCATCAATCTTAGGAGCTATTAAATTTTATTACAACATATTATAATATACGAATTAACCATATATCAATTTGATCAAA  
ACCTCTCTTTGTATGAGCAGTAGGAATTAAGTGTGCTTGTATTTATTATCTTTTACCTGTATTAGCTGGTGCTATTACTATATTATTAACAGATCGA  
AACTTAATACTCTCAATTTTTGATCTCGCAGGAGTTGGAGATCCTATTTTATATCAACATTTA

ACACATATATTTTTATTTTGGTATTGTAGCAGGATATAGTAGGAACCTCTTTAAGATTATTAATTCGTA CTGAATTAGGTAATCCTGGATCTTTAATTG  
GAGATGATCAAATTTATAATACTATTGTAGTACAGCTCATGCTCTTTATATAATTTTTTTTATAGTTTATACCAATTATAAATGGAGGATTTGGAAATTTG  
ATTAATTCCTTTAATAATAGCGGCCGAGTATAGCTTTTCTCGAATAAAATATAAGATTTTGATTAATACCCCTTGAGGATTAACCTTTATTAAT  
TCTAGAAGAAATTGTAGAAAAATGGAGCAGGAACAGGATGAACAAATTTATCCCCCTTTATCATCTAATATCGCTCATAGAGGTAGTTCAGTTGATTAG  
CATTTTTTCTTTACATTTTAGCGGGAATTTATCAATCTTAGAGACTTTAATTTTATACAACTATTATTAATATACGAATTAATCATATATCAATT  
TGATCAAATACCTCTCTTTGTATGAGCATTAGGAATACTGCTTTACTTTTACTTTACTCTTACCTGTATTAGCTGGTGCTATTACTATATTATTA  
ACAGATCGAAATCTTAATACCTCATTTTTTGTACCTGCTGAGGAGGTGGAGATCCTATTTTATATCAACATTTA

ACACATATATTTTTATTTTGGTATTTTGAGCAGGTATAGTAGGAACCTCTTTAAGATTTTAAATTCGTA CTGTAATTAGGTAATCCTGGATCTTTAATTG  
GAGATGATCAAAATTTATAACTACTATGCTGACAGCTCATGCTCTTTATATAATTTTTTTTATAGTTTATACCAATTAATAATGGAGGATTTGGAAATTTG  
ATTAATTCCTTTAAATATTAGGGGCCCGATATAGCTTTTCTCGAATAAAATAATAGAATTTTGATTAATACCCCTTCAGGTAACCTTTATTAATTT  
TCTAGAAGAAATTGTAGAAAAATGGAGCAGGAACAGGATGAACAGTTTATCCCCCTTTATCATCTAATATCGCTCATAGAGGTAGTTCAAGTTGATTTAG  
CTATTTTTCCTTTACATTTTAGCGGGAAATCTCATCAACTCTAGAGCACTTAATTTTTATACAACTATTTATTAATACGAATTAATCATATATCAATT  
TGATCAAACTACTCTTTTGTATGAGCAGTAGGAATACTGCTTTACTTTTACTTATCTATCTTTACGTTACTGTAGCTGGTGCTATTACTATATTATTA  
ACAGATCGAAATCTTAATACCTCAATTTTGTACTCTGAGGAGGTTGAGATCCTATTTTATATCAACATTTA

ACACATATATTTTATTTTGGTATTGTAGCAGGTATAGTAGGAACCTCTTTAAGATTATTAATTCGTACTGAATTAGGTAATCCTGGATCTTTAATG  
GAGATGATCAAAATTTATAATACTATGTAACAGCTCATGCTTTTATTAATAATTTTTTTATAGTTATACCAATTAATAATTGGAGGATTGGAAATTTG  
ATAATTCCCTTAATATTAGGAGCCAGATATAGCTTTTCCTCGAATAAAATATAAGAAATTTTGATTACTACCCCTCATTAACCTTTATTAATT  
TCTAGAAGAATTGTAGAAAAATGGAGCAGGAACAGGATGAACAGTTTATCCCTCTTATCATCTAATATCGCTCATAGAGGTAGTTCAGTTGATTAG  
CTATTTTTCTTTACATTTAGCAGGAATTTCATCAATCTTAGAGCTATTAATTTTTATACAACTATTAATTAATACGAATTAACCATATATCAT  
TGATCAAAATACCTCTCTTTGTATGAGCAGATAGGAATTACTTTTACTTTTATTAATCTTTACCTGTATTAGCTGGTGCTATTACTATATTATTA  
ACAGATCGAAATCTTAATCTCATTTTTTGTACTCTGCAGGAGGTGGAGATCCTATTTTATATCAACATTTA

ACACATATATTTTATTTTGGTATTGTAGCAGGATAGTAGGAACCTCTTTAAGATTATTAATTCGTACTGAATTAGGTAATCCTGGATCTTTAATG  
GAGATGATCAAAATTTATAATACTATGTAACAGCTCATGCTTTTATTAATTTTTCTCATAGTTATACCAATTATAATTTGGAGGAAATTTGGAATTTG  
ATTAATTCCTTTAATATTAGGAGCCGAGATATAGCTTTTCTCGAATAAAATATAAGATTTTGATTACTACCCCTTCAGTAACCTTTATTAATT  
TCCAGAAGAATTGTAGAAAAATGGAGCAGGAACAGGATGAACAGTTTATCCCCCTTTATCATCTAATATTGCTCATAGAGGTAGTTTCAGTTGATTTAG  
CTATTTTTCTTTACATTTTAGCAGGAATTTTCATCAATTTTAGAGCTATTAATTTTCATTACAACTATTTATTAATATACGAATTAAACCATATATCAAT  
TGATCAAAATACCCCTCTTTGTATGAGCAGTAGGAATACTGCTTTACTTTTATTTATTTACTTTCTGTAATTAGCTGGTGCTATTACTATATTATTA  
ACAGATCGAAATCTTAATCTCATTTTTTGTAGCTCGCAGGAGGTGGAGATCCTATTTTATATCAACATTTA

ACACATATATTTTATTTTGGTATTGTAGCAGGTATAGTAGGAACCTCTTTAAGATTATTAATTCGTACTGAATTAGGTAATCTGGATCTTTAATG  
GAGATGATCAAAATTTATAATAGTATGTAACAGCTCATGCTTTTATTAATTTTTTATAGTTATACCAATTAATTCGGAGGATTTGGAAATTTG  
ATAATTCCTTTAATATAGAGGCCCCAGATATAGCTTTTCTCGAATAAAATATAAGAAATTTGATTATACCCCTTCACTAACTTTTATTAAT  
TCTAGAAATAATTGTAGAAAAATGGAGCAGGAACAGGATGAACAGTTTATCCCCCTTTATCATCTAATATCGCTCATAGAGGTAGTTTCAGTTGATTAG  
CTATTTTTCTTTACATTTAGCGGGAATTTTCATCAATCTTAGAGCATTTAATTTTTATACAACTATTTATTAATACGAATTAATCATATATCAAT  
TGATCAAATACCTCTCTTTGTATGAGCAGTAGGAATACTGCTTTACTTTTATTAATCTTTACTGTTATAGCTGGTGCTATTACTATATTATTA  
ACAGATCGAAATCTTAATCTCATTTTTTGTAGCTCGCAGGAGGTGGAGATCCTATTTTATATCAACATTTA

TTTATTTTGGTATTTGAGCAGGTATAGTAGGAACCTCTTTAAGATTATTAATTCGTA CTGAATTAGGTAATCCTGGATCTTTAATTTGGAGATGATC  
AAATTTATAATCATTTAGTTGAACAGCTCATGCTTTTATTTATTAATTTTTTTTATAGTTATACCAATTAATTTGGAAATTTGGAAATTTGATTAATCTC  
TTTAAATATTAGGAGCCCCAGATATAGCTTTTCTCGAATAAAATAAAGATTTTGATTACTGCCCCCTCATTAACTTTAAATTTCTAGAAGA  
ATTGTAGAAAATGGAGCAGGAACAGGATGAACAGTTTATCCCTCTTATCATCTAATATCGCTCATAGAGGTAGTTCAGTTGATTTAGCTATTTTTT  
CTTTACATTTAGCAGGAATTTTCATCAATCTTAGGAGCTATTAATTTTATCACAACTATTTAATAATACGAATTAATCATATATCATTTGATCAAA  
ACCTCTCTTTGTATGAGCAGTAGGAATAC?GCTTTACTTTTATTTATTTACTTTTACCTGTATTAGCTGG?GCTATTACTATATTATTAACAGATCGA  
AATCT?AATACTCATTTTTTGTCTCTGAGGAGGAGATCCTATTTTATACAACTTTA

ACACATATATTTTATTTTGGTATTGAGCAGGTATAGTAGGAACCTCTTAAAGATTATTAATTCGTACTGAATTAGGTAATCCTGGATCTTTAATTG  
GAGATGATCAAAATTTATAATCTAGTTGAACAGCTCATGCTTTTATTTATTAATTTTTTTATAGTTATACCAATTATAATTGGAGGATTTGGAAATTG  
ATTAATTCCTTTAATATTAGGGGCCAGATATAGCTTTCTTCGAATAAATAAGAAATTTTGATTATACCCCTTCATTAACTTTTATAATT  
TCTAGAAGAAATGTAGAAAATGGAGCAGGAACAGGATGAACAGTTTATCCCCCTTATCATCTAAATTCGCTCATAGAGGTAGTTCAGTTGATTTAG  
CTATTTTTTCTTTACATTTAGCGGGGATTTATCAATCTTAGAGACTTAAATTTTTATACAACTAATTTATTAATACGAATTAATCATATATCAT  
TGATCAAATACCTCTCTTTGTATGAGCAGTAGGAATACTGGTTACTTTTATTTATCTTTACCTGATTTAGCTGGTGCTATTACTATATTATTA  
ACAGATCGAAATCTTAATCTCATTTTTTGATCCTGACGAGGTGGAGATCCTATTTTATATCAACATTTA

ACACATATATTTTATTTTGGTATTGAGCAGGTATAGTAGGAACCTCTTAAAGATTATTAATTCGTACTGAATTAGGTAATCCTGGATCTTTAATG  
GAGATGATCAAAATTTATAATACTATGTAACAGCTCATGCTTTTATTAATAATTTTTTTATAGTTATAACCAATTATAATTTGGAGAGATTGGAAATTTG  
ATAATTCTCTTTAATATTAGGGGCCAGATATAGCTTTTCTCGAATAAATAATAGAATTTTGATTATACCCCTTCAATTAACCTTTATTAATT  
TCTAGAAGAATTGTAGAAAAAGGAGCAGGAACAGGATGAACAGTTTATCCCCCTTTATCATCTAATATCGCTCATAGAGGTAGTTTCAGTTGATTTAG  
CTATTTTTCTTTACATTTTACGGGAATTTATCATCAATCTTAGAGCTATTAATTTTTATACAACTAATTTAATAACGAATTAATCATATATCAT  
TGATCAAAATACCTCTCTTTGTATGAGCAGTGAAGTAATCTTTACTTTTATTTACTATCTTTACCTGTATTAGCTGGTGCTATTACTATATTATTA  
ACAGATCGAAATCTTAATCTCATTTTTTGTAGCTCGCAGGAGGTGGAGATCCTATTTTATATCAACATTTA

ACATTATATTTTATTTTGGTATTGAGCAGGTATAGTAGGAACCTCCTTAAGATTATTAATTCGTACTGAATTAGGTAATCCTGGATCTTTAATTG  
GAGATGATCAAAATTTATAATACTATGTAAACAGCTCATGCTTTTATTTATTAATTTTTTATAGTTATACCAATTAATAATTGGAGGATTTGGAAATTTG  
ATTAATTCCTTTAATAATTAGGAGCCAGATATAGCTTTCCCCGGAATAAATAAGAAATTTGATTATTAACCCCTCATTAACTTTATTAATT  
TCTAGAAGAATTGTAGAAAAATGGAGCAGGAACCTGGATGAACAGTTTATCCCCCTTATCATCTAATAATTGCCATAGAGGTGATTCAGTTGATTTAG  
CTATCTTTTCTTTACATTTTAGCAGGAATTATCATCAATTTTAGAGACTATTAATTTTATACAACTAATTTATTAATACGAATTAATCATATATCATTT  
TGATCAAATACCTCTTTTGTATGAGCAGTACAGGAATTAAGCTGCTTACTTTTATTAATCTTTACCTGATCTTATAGCTGGTGCTATTACTATATTA  
ACAGATCGAAATCTTAATACCTCATTTTTTGTATCAGCAGGAGGTGGAGATCCTTTTATATCAACATTTA



LOWAM087\_Uzbekistan\_Sarchashma

ACACTATATTTTATTTTGGTATTTGAGCAGGTATAGTAGGAACCTCTTTAAGATTATTAATTCGTACTGAATTAGGTAATCCTGGATCTTTAATTG  
GAGATGATCAAATTTATAAATACTATTGTAACAGCTCATGCTTTTATTATAATTTTTTTCATAGTTATACCAATTATAAATTGGAGGATTTGGAAATTG  
ATTAATTCCTTTAATATTAGGAGCCCCAGATATAGCTTTTCTCGAATAAATAATATAAGATTTTGATTACTACCCCTTCATTAACCTTTATTAATT  
TCCAGAAGAATTGTAGAAAATGGAGCAGGAACAGGATGAACAGTTTATCCCCCTTTATCAGTAAATATCGCTCATAGAGGTGATTCAGTTGATTTAG  
CTATTTTTTCTTTACATTTAGCAGGAATTTTCATCAATTTTAGGAGCTATTAATTTTCATTACAACCTATTATTAATATACGAATTAACCATATATCATT  
TGATCAAATACCCCTCTTTGTATGAGCAGTAGGAATTACTGCTTTACTTTTATTATTATCTTTACCTGTATTAGCTGGTGCATTACTATATTATTA  
ACAGATCGAAATCTTAATACTTCATTTTTTGATCTCGCAGGAGGTGGAGATCCTATTTA?ATCAACATTTA

LOWAM095\_Kyrgyzstan\_Sosnovka

ACACTATATTTTATTTTGGTATTTGAGCAGGTATAGTAGGAACCTCTTTAAGATTATTAATTCGTACTGAATTAGGTAATCCTGGATCTTTAATTG  
GAGATGATCAAATTTATAAATACTATTGTAACAGCTCATGCTTTTATTATAATTTTTTTTATAGTTATACCAATTATAAATTGGAGGATTTGGAAATTG  
ATTAATTCCTTTAATATTAGGGGCTCCAGATATAGCTTTTCTCGAATAAATAATATAAGATTTTGATTATTACCCCTTCATTAACCTTTATTAATT  
TCTAGAAGAATTGTAGAAAATGGAGCAGGAACAGGATGAACAGTTTATCCCCCTTTATCATCTAATATCGCTCATAGAGGTAGTTCAGTTGATTTAG  
CTATTTTTTCTTTACATTTAGCGGAATTTTCATCAATCTTAGGAGCTATTAATTTTATTACAACCTATTATTAATATACGAATTAATCATATATCATT  
TGATCAAATACCTCTCTTTGTATGAGCAGTAGGAATTACTGCTTTACTTTTATTACTATCTTTACCTGTATTAGCTGGTGCATTACTATATTATTA  
ACAGATCGAAATCTTAATACTTCATTTTTTGATCTCGCAGGAGGTGGAGATCCTATTTTATATCAACATTTA

LOWAM096\_Gissar\_5

ACACTATATTTTATTTTGGTATTTGAGCAGGTATAGTAGGAACCTCTTTAAGATTATTAATTCGTACTGAATTAGGTAATCCTGGATCTTTAATTG  
GAGATGATCAAATTTATAAATACTATTGTAACAGCTCATGCTTTTATTATAATTTTTTTCATAGTTATACCAATTATAAATTGGAGGATTTGGAAATTG  
ATTAATTCCTTTAATATTAGGAGCCCCAGATATAGCTTTTCTCGAATAAATAATATAAGATTTTGATTACTACCCCTTCATTAACCTTTATTAATT  
TCCAGAAGAATTGTAGAAAATGGAGCAGGAACAGGATGAACAGTTTATCCCCCTTTATCGTCTAATATCGCTCATAGAGGTAGTTCAGTTGATTTAG  
CTATTTTTTCTTTACATTTAGCAGGAATTTTCATCAATTTTAGGAGCTATTAATTTTCATTACAACCTATTATTAATATACGAATTAACCATATATCATT  
TGATCAAATACCCCTCTTTGTATGAGCAGTAGGAATTACTGCTTTACTTTTATTACTATCTTTACCTGTATTAGCTGGTGCATTACTATATTATTA  
ACAGATCGAAATCTTAATACTTCATTTTTTGATCTCGCAGGAGGTGGAGATCCTATTTTATATCAACATTTA

LOWAM098\_Tajikistan\_Khondizal

ACACTATATTTTATTTTGGTATTTGAGCAGGTATAATAGGAACCTCTTTAAGATTATTAATTCGTACTGAATTAGGTAATCCTGGATCTTTAATTG  
GAGATGATCAAATTTATAAATACTATTGTAACAGCTCATGCTTTTATTATAATTTTTTTCATAGTTATACCAATTATAAATTGGAGGATTTGGAAATTG  
ATTAATTCCTTTAATATTAGGAGCCCCAGATATAGCTTTTCTCGAATAAATAATATAAGATTTTGATTACTACCCCTTCATTAACCTTTATTAATT  
TCCAGAAGAATTGTAGAAAATGGAGCAGGAACAGGATGAACAGTTTATCCCCCTTTATCGTCTAATATCGCTCATAGAGGTAGTTCAGTTGATTTAG  
CTATTTTTTCTTTACATTTAGCAGGAATTTTCATCAATTTTAGGAGCTATTAATTTTCATTACAACCTATTATTAATATACGAATTAACCATATATCATT  
TGATCAAATACCCCTCTTTGTATGAGCAGTAGGAATTACTGCTTTACTTTTATTATTATCTTTACCTGTATTAGCTGGTGCATTACTATATTATTA  
ACAGATCGAAATCTTAATACTTCATTTTTTGATCTCGCAGGAGGTGGAGATCCTATTTTATATCAACATTTA

LOWAM099\_Uzbekistan\_Kamchik\_2

ACACTATATTTTATTTTGGTATTTGAGCAGGTATAGTAGGAACCTCTTTAAGATTATTAATTCGTACTGAATTAGGTAATCCTGGATCTTTAATTG  
GAGATGATCAAATTTATAAATACTATTGTAACAGCTCATGCTTTTATTATAATTTTTTTTATAGTTATACCAATTATAAATTGGAGGATTTGGAAATTG  
ATTAATTCCTTTAATATTAGGGGCCCCAGATATAGCTTTTCTCGAATAAATAATATAAGATTTTGATTATTACCCCTTCATTAACCTTTATTAATT  
TCTAGAAGAATTGTAGAAAATGGAGCAGGAACAGGATGAACAGTTTATCCCCCTTTATCATCTAATATCGCTCATAGAGGTAGTTCAGTTGATTTAG  
CTATTTTTTCTTTACATTTAGCAGGAATTTTCATCAATTTTAGGAGCTATTAATTTTATTACAACCTATTATTAATATACGAATTAATCATATATCATT  
TGATCAAATACCTCTCTTTGTATGAGCAGTAGGAATTACTGCTTTACTTTTATTACTATCTTTACCTGTATTAGCTGGTGCATTACTATATTATTA  
ACAGATCGAAATCTTAATACTTCATTTTTTGATCTCGCAGGAGGTGGAGATCCTATTTTATATCAACATTTA

LOWAM100\_Kyrgyzstan\_Konduk

ACACTATATTTTATTTTGGTATTTGAGCAGGTATAGTAGGAACCTCTTTAAGATTATTAATTCGTACTGAATTAGGTAATCCTGGATCTTTAATTG  
GAGATGATCAAATTTATAAATACTATTGTAACAGCTCATGCTTTTATTATAATTTTTTTTATAGTTATACCAATTATAAATTGGAGGATTTGGAAATTG  
ATTAATTCCTTTAATATTAGGGGCCCCAGATATAGCTTTTCTCGAATAAATAATATAAGATTTTGATTATTACCCCTTCATTAACCTTTATTAATT  
TCTAGAAGAATTGTAGAAAATGGAGCAGGAACAGGATGAACAGTTTATCCCCCTTTATCATCTAATATCGCTCATAGAGGTAGTTCAGTTGATTTAG  
CTATTTTTTCTTTACATTTAGCGGAATTTTCATCAATCTTAGGAGCTATTAATTTTATTACAACCTATTATTAATATACGAATTAATCATATATCATT  
TGATCAAATACCTCTCTTTGTATGAGCAGTAGGAATTACTGCTTTACTTTTATTACTATCTTTACCTGTATTAGCTGGTGCATTACTATATTATTA  
ACAGATCGAAATCTTAATACTTCATTTTTTGATCTCGCAGGAGGTGGAGATCCTATTTTATATCAACATTTA

LOWAM115\_Azerbaijan\_Nyus\_Nyus

ACACTATATTTTATTTTCGTATTTGAGCAGGTATAGTAGGAACCTCTTTAAGATTATTAATTCGTACTGAATTAGGTAATCCCGGATCTTTAATTG  
GAGATGATCAAATTTATAAATACTATTGTAACAGCTCATGCTTTTATTATAATTTTTTTTATAGTTATACCAATTATAAATTGGAGGATTTGGAAATTG  
ATTAATTCCTTTAATATTAGGAGCTCCAGATATAGCTTTTCTCGAATAAATAATATAAGATTTTGATTACTACCCCTTCATTAACCTTTATTAATT  
TCTAGAAGAATTGTAGAAAATGGAGCAGGAACAGGATGAACAATTTATCCCCCTTTATCATCTAATATTGCTCATAGAGGTAGTTCAGTTGATTTAG  
CTATTTTTTCTTTACATTTAGCAGGAATTTTCATCAATCTTAGGAGCTATTAATTTTATTACAACCTATTATTAACATACGAATTAATCATATATCATT  
TGATCAAATACCCCTTTTGTATGAGCAGTAGGAATTACTGCATTACTTTTATTATTATCTTTACCTGTATTAGCTGGTGCATTACTATATTATTA  
ACAGATCGAAATCTTAATACTTCATTTTTTGATCTCGCAGGAGGTGGAGATCCTATTTTATATCAACACTTA

LOWAM116\_Iran\_Dizin\_2

ACACTATATTTTATTTTCGTATTTGAGCAGGTATAGTAGGAACCTCTTTAAGATTATTAATTCGTACTGAATTAGGTAATCCTGGATCTTTAATTG  
GAGATGATCAAATTTATAAATACTATTGTAACAGCTCATGCTTTTATTATAATTTTTTTTATAGTTATACCAATTATAAATTGGAGGATTTGGAAATTG  
ATTAATTCCTTTAATATTAGGAGCTCCAGATATAGCTTTTCTCGAATAAATAATATAAGATTTTGATTACTACCCCTTCATTAACCTTTATTAATT  
TCTAGAAGAATTGTAGAAAATGGAGCAGGAACAGGATGAACAATTTATCCCCCTTTATCATCTAATATTGCTCATAGAGGTAGTTCAGTTGATTTAG  
CTATTTTTTCTTTACATTTAGCAGGAATTTTCATCAATCTTAGGAGCTATTAATTTTATTACAACCTATTATTAACATACGAATTAATCATATATCATT  
TGATCAAATACCCCTTTTGTATGAGCAGTAGGAATTACTGCATTACTTTTATTATTATCTTTACCTGTATTAGCTGGTGCATTACTATATTATTA  
ACAGATCGAAATCTTAATACTTCATTTTTTGATCTCGCAGGAGGTGGAGATCCTATTTTATATCAACACTTA

LOWAM122\_Russia\_Saratow\_1

ACACTATATTTTATTTTGGTATTTGAGCAGGTATAGTAGGAACCTCTTTAAGATTATTAATTCGTACTGAATTAGGTAATCCTGGATCTTTAATTG  
GAGATGATCAAATTTATAAATACTATTGTAACAGCTCATGCTTTTATTATAATTTTTTTTATAGTTATACCAATTATAAATTGGAGGATTTGGAAATTG  
ATTAATTCCTTTAATATTAGGAGCCCCAGATATAGCTTTTCTCGAATAAATAATATAAGATTTTGATTACTACCCCTTCATTAACCTTTATTAATT  
TCTAGAAGAATTGTAGAAAATGGAGCAGGAACAGGATGAACAGTTTATCCCCCTTTATCATCTAATATCGCTCATAGAGGTAGTTCAGTTGATTTAG  
CTATTTTTTCTTTACATTTAGCAGGAATTTTCATCAATCTTAGGAGCTATTAATTTTATTACAACCTATTATTAATATACGAATTAACCATATATCATT

TGATCAAATACCTCTCTTTGTATGAGCAGTAGGAATTACTGCTTTACTTTTATTATTATCTTTACCTGTATTAGCTGGTGCATTACTATATTATTA  
ACAGATCGAAATCTTAATACTTCATTTTTTGATCCTGCAGGAGGTGGGATCCTATTTTATATCAACATTTA

LOWAM136\_Uzbekistan\_Tamshush\_1

ACACTATATTTTATTTTGGTATTTGAGCAGGTATAGTAGGAACCTCTTTAAGATTATTAATTCGTACTGAATTAGGTAATCCTGGATCTTTAATTG  
GAGATGATCAAATTTATAAATACTATTGTAACAGCTCATGCTTTTATTATAATTTTTTTCATAGTTATACCAATTATAAATTGGAGGATTTGGAAATTG  
ATTAATTCCTTTAATATTAGGAGCCCCAGATATAGCTTTTCTCGAATAAATAATATAAGATTTTGATTACTACCCCTTCATTAACCTTTATTAATT  
TCCAGAAGAAATTGTAGAAAATGGAGCAGGAACAGGATGAACAGTTTATCCCCCTTTATCATCTAAATATCGCTCATAGAGGTAGTTCAGTTGATTTAG  
CTATTTTTCTTTACATTTTAGCAGGAATTTTCATCAATTTTAGGAGCTATTAATTTTCATTACAACCTATTATTAATATACGAATTAACCATATATCATT  
TGATCAAATACCCCTCTTTGTATGAGCAATAGGAATTACTGCTTTACTTTTATTATTATCTTTACCTGTATTAGCTGGTGCATTACTATATTATTA  
ACAGATCGAAATCTTAATACTTCATTTTTTGATCCTGCAGGAGGTGGAGATCCTATTTTATATCAACATTTA

LOWAM149\_Kyrgyzstan\_Songkel\_1

ACACTATATTTTATTTTGGTATTTGAGCAGGTATAGTAGGAACCTCTTTAAGATTATTAATTCGTACTGAATTAGGTAATCCTGGATCTTTAATTG  
GAGATGATCAAATTTATAAATACTATTGTAACAGCTCATGCTTTTATTATAATTTTTTATAGTTATACCAATTATAAATTGGAGGATTTGGAAATTG  
ATTAATTCCTTTAATATTAGGGGCCCCAGATATAGCTTTTCTCGAATAAATAATATAAGATTTTGATTATACCCCTTCATTAACCTTTATTAATT  
TCTAGAAGAATTGTAGAAAATGGAGCAGGAACAGGATGAACAGTTTATCCCCCTTTATCATCTAAATATTGCTCATAGAGGTAGTTCAGTTGATTTAG  
CTATTTTTCTTTACATTTTAGCGGGAATTTTCATCAATCTTAGGAGCTATTAATTTTATTACAACCTATTAAATATACGAATTAACCATATATCATT  
TGATCAAATACCTCTCTTTGTATGAGCAGTAGGAATTACTGCTTTACTTTTATTACTATCTTTACCTGTATTAGCTGGTGCATTACTATATTATTA  
ACAGATCGAAATCTTAATACTTCATTTTTTGATCCTGCAGGAGGTGGAGATCCTATTTTATATCAACATTTA

LOWAM198\_Turkey\_Aladaglar\_2

ACACTATATTTTATTTTGGTATTTGAGCAGGTATAGTAGGAACCTCTTTAAGATTATTAATTCGTACTGAATTAGGTAATCCTGGATCTTTAATTA  
GAGATGATCAAATTTATAAATACTATTGTAACAGCTCATGCTTTTATTATAATTTTTTATAGTTATACCAATTATAAATTGGAGGATTTGGAAATTG  
ATTAATTCCTTTAATATTAGGAGCTCCAGATATAGCTTTTCTCGAATAAATAATATAAGATTTTGATTACTACCCCTTCATTAACCTTTATTAATT  
TCTAGAAGAATTGTAGAAAATGGAGCAGGAACAGGATGAACAGTTTATCCCCCTTTATCATCTAAATATTGCTCATAGAGGTAGTTCAGTTGATTTAG  
CTATTTTTCTTTACATTTTAGCAGGAATTTTCATCAATCTTAGGAGCTATTAATTTTATTACAACCTATTATTAATATA-----  
-----  
-----

LOWAM213\_Tajikistan\_Tandukul\_1

ACACTATATTTTATTTTGGTATTTGAGCAGGTATAGTAGGAACCTCTTTAAGATTATTAATTCGTACTGAATTAGGTAATCCTGGATCTTTAATTG  
GAGATGATCAAATTTATAAATACTATTGTAACAGCTCATGCTTTTATTATAATTTTTTTCATAGTTATACCAATTATAAATTGGAGGATTTGGAAATTG  
ATTAATTCCTTTAATATTAGGAGCTCCAGATATAGCTTTTCTCGAATAAATAATATAAGATTTTGATTACTACCCCTTCATTAACCTTTATTAATT  
TCTAGAAGAATTGTAGAAAATGGAGCAGGAACAGGATGAACAGTTTATCCCCCTTTATCATCTAAATATTGCTCATAGAGGTAGTTCAGTTGATTTAG  
CTATTTTTCTTTACATTTTAGCAGGAATTTTCATCAATTTTAGGAGCTATTAATTTTCATTACAACCTATTATTAATATACGAATTAACCATATATCATT  
TGATCAAATACCCCTCTTTGTATGAGCAGTAGGAATTACTGCGTTACTTTTATTATTATCTTTACCTGTATTAGCTGGTGCATTACTATATTATTA  
ACAGATCGAAATCTTAATACTTCATTTTTTGATCCTGCAGGAGGTGGAGATCCTATTTTATATCAACATTTA

Parnassius\_clodius

ACATTATATTTTATTTTGGTATTTGAGCAGGTATAGTAGGAACCTCTTTAAGATTATTAATTCGTACTGAATTAGGTAATCCTGGATCTTTAATTG  
GAGATGATCAAATTTATAAATACTATTGTAACAGCTCATGCTTTTATCATAATTTTTTTCATAGTTATACCAATTATAAATTGGAGGATTTGGAAATTG  
ATTAATTCATTAAATATTAGGAGCTCCAGATATAGCTTTTCTCGAATAAATAATATAAGATTTTGATTATACCCCTTCATTAACCTTTATTAATT  
TCTAGAAGAATTGTACAAAATGGAGCAGGAACCTGGATGAACAGTTTATCCCCCTTTATCATCTAAATATTGCTCATAGAGGAAGATCAGTTGATTTAG  
CTATTTTTCTTTACATTTAGCTGGAATTTTCATCTATCTTAGGAGCTATTAATTTTATTACAACCTATTATTAATATACGAATTAATCATATATCATT  
TGATCAAATACCCCTCTTTGTATGAGCAGTAGGAATTACCGCTTTACTTCTATTATTATCTTTACCTGTTTTAGCAGGTGCATTACCATATTATTA  
ACAGATCGAAATCTTAATACTTCATTTTTTGATCCAGCAGGAGGTGGAGATCCTATTTTATATCAACACTTA

Parnassius\_eversmanni\_2005\_LOWA\_108

ATTTGAGCAGGTATAGTAGGAACCTCTTTAAGATTATTAATTCGTTCTGAATTAGGTAATCCTGGATCTTTAATTGGAGATGATCAAATTTATAATA  
CTATTGTAACAGCTCATGCTTTTATTATAATTTTTTTATAGTTATACCAATTATAAATTGGAGGATTTGGAAATTGATTAATTCCATTAATATTAGG  
AGCTCCAGATATAGCTTTTCTCGAATAAATAATATAAGATTTTGATTATTACCCCTTCATTAACCTTACTAATTTCTAGAAGAATTGTAGAAAAT  
GGAGCAGGAACCTGGATGAACGGTTTATCCCCCTTTATCATCTAAATATTGCTCATAGAGGAAGATCAGTTGATTTAGCTATCTTTCTTTACATTTAG  
CTGGAATTTTCATCTATCTTAGGAGCTATTAATTTTATTACAACCTATTATTAATATACGAATTAATCATATATCATTTTGATCAAATACCCCTTTTGT  
ATGAGCAGTAGGAATTACTGCTTTACTTTTATTATTATCTTTACCTGTTTTAGCAGGTGCATTACCATATTATTAACAGATCGAAATCTTAATACT  
TCATTTTTTGACCCAGCAGGAGGTGGAGATCCTATTTTATATCAACATTTA

Parnassius\_eversmanni\_2005\_LOWA\_107

ATTTGAGCAGGTATAGTAGGAACCTCTTTAAGATTATTAATTCGTTCTGAATTAGGTAATCCTGGATCTTTAATTGGAGATGATCAAATTTATAATA  
CTATTGTAACAGCTCATGCTTTTATTATAATTTTTTTATAGTTATACCAATTATAAATTGGAGGATTTGGAAATTGATTAATTCCATTAATATTAGG  
AGCTCCAGATATAGCTTTTCTCGAATAAATAATATAAGATTTTGATTATTACCCCTTCATTAACCTTACTAATTTCTAGAAGAATTGTAGAAAAT  
GGAGCAGGAACCTGGATGAACGGTTTATCCCCCTTTATCATCTAAATATTGCTCATAGAGGAAGATCAGTTGATTTAGCTATCTTTCTTTACATTTAG  
CTGGAATTTTCATCTATCTTAGGAGCTATTAATTTTATTACAACCTATTATTAATATACGAATTAATCATATATCATTTTGATCAAATACCCCTTTTGT  
ATGAGCAGTAGGAATTACTGCTTTACTTTTATTATTATCTTTACCTGTTTTAGCAGGTGCATTACCATATTATTAACAGATCGAAATCTTAATACT  
TCATTTTTTGACCCAGCAGGAGGTGGAGATCCTATTTTATATCAACATTTA

Parnassius\_stubbendorfii\_2005\_LOWA\_815

ACATTATATTTTATTTTGGTATTTGAGCAGGTATAGTAGGAACCTCTTTAAGATTATTAATTCGTACTGAATTAGGTAATCCTGGATCTTTAATTG  
GAGATGATCAAATTTATAAATACTATTGTAACAGCTCATGCTTTTATTATAATTTTTTATAGTTATACCAATTATAAATTGGAGGATTTGGAAATTG  
ATTAATTCCTTTAATATTAGGAGCCCCAGATATAGCTTTTCTCGAATAAATAATATAAGATTTTGATTATTACCCCTTCATTAACCTTTACTAATT  
TCCAGAAGAATTGTAGAAAATGGGCGAGGAACCTGGATGAACAGCTACCCCTCTTTATCATCTAAATATTGCTCACGGAGGAAGATCTGTTGATTTAG  
CTATTTTTCTTTACATTTAGCGGGAATTTTCATCTATTTTAGGAGCCATTAATTTTATTACAACCTATTATTAATATACGAATTAATCATATATCATT  
TGATCAAATACCTCTTTTGTATGAGCAGTAGGAATTACTGCTTTACTTTTATTATTATCTTTACCTGTTTTAGCAGGTGCATTACTATATTATTA  
ACAGATCGAAATCTTAATACTTCATTTTTTGACCCAGCAGGAGGTGGAGATCCTATTTTATATCAACACTTA

Parnassius\_stubbendorfii\_2005\_LOWA\_154

ACATTATATTTTATTTTGGTATTTGAGCAGGTATAGTAGGAACCTCTTTAAGATTATTAATTCGTACTGAATTAGGTAATCCTGGATCTTTAATTG  
GAGATGATCAAATTTATAAATACTATTGTAACAGCTCATGCTTTTATTATAATTTTTTATAGTTATACCAATTATAAATTGGAGGATTTGGAAATTG  
ATTAATTCCTTTAATATTAGGAGCCCCAGATATAGCTTTTCTCGAATAAATAATATAAGATTTTGATTATTACCCCTTCATTAACCTTTACTAATT  
TCCAGAAGAATTGTAGAAAATGGAGCAGGAACCTGGATGAACAGCTACCCCTCTTTATCATCTAAATATTGCTCACGGAGGAAGATCTGTTGATTTAG

CTATTTTTTCTTACATTTAGCGGGAATTTTCATCTATTTTAGGAGCCATTAAATTTATTACAACCTATTATTAATATACGAATTAATCATATATCATT  
TGATCAAATACCTCTTTTTGTATGAGCAGTAGGAATTACTGCTTTACTTTTATTATTATCTCTACCTGTTTTAGCAGGTGCTATTACTATATTATTA  
ACAGATCGAAATCTTAATACTTCATTTTTTGACCCAGCAGGAGGTGGAGATCCTATTTTATATCAACACTTA

Parnassius\_stubbendorfii\_2005\_LOWA\_153 -  
CATTATATTTTATTTTTGGTATTTGAGCAGGTATAGTAGGAACCTCTTTAAGATTATTAATTCGTACTGAATTAGGTAATCCTGGATCTTTAATTGG  
AGATGATCAAATTTATAACTATTGTAACAGCTCATGCTTTTATTATAATTTTTTTTATAGTTATACCAATTATAATTGGAGGATTTGGAAATTGA  
TTAATTCCTTTAAATATTAGGAGCCCCAGATATAGCTTTTCCCTCGAATAAAATAATATAAGATTTTGATTATTACCCCTTCATTAACCTTTACTAATTT  
CCAGAAGAATTGTAGAAAATGGAGCAGGAACCTGGATGAACAGTCTACCCCTCTTTATCATCTAATATTGCTCACGGAGGAAGATCTGTTGATTTAGC  
TATTTTTTCTTACATTTAGCGGGAATTTTCATCTATTTTAGGAGCCATTAAATTTTATTACAACCTATTATTATATACGAATTAATCATATATCATT  
GATCAAATACCTCTTTTTGTATGAGCAGTAGGAATTACTGCTTTACTTTTATTATTATCTCTACCTGTTTTAGCAGGTGCTATTACTATATTATTA  
CAGATCGAAATCTTAATACTTCATTTTTTGACCCAGCAGGAGGTGGAGATCCTATTTTATATCAACACTTA

Parnassius\_nordmanni  
ACATTATATTTTATTTTTGGTATTTGAGCAGGTATAGTAGGAACCTCTTTAAGATTATTAATTCGTACTGAATTAGGTAATCCTGGATCTCTAATTG  
GAGATGATCAAATTTACAATACTATCGTAACAGCTCATGCTTTTATTATAATTTTTTTTCATAGTTATACCAATTATAATTGGAGGATTTGGAAATTG  
ATTAATTCATTAAATATTAGGAGCTCCAGATATAGCTTTCCCCGAATAAAATAATATAAGATTTTGATTATTACCCCTTCATTAACCTCTATTAATT  
TCTAGAAGAATTGTAGAAAATGGAGCAGGAACCTGGATGAACGGTTTATCCCCCTTTATCATCTAATATTGCTCATAGAGGAAGATCAGTTGATTTAG  
CTATTTTTTCTTTACATTTGGCTGGGATTTCTTCTATTTTAGGAGCTATTAATTTTATCACAACTATTGTTAATATACGAATTAACATATATCATT  
TGATCAAATACCTCTTTTCGTATGAGCAGTAGGAATTACTGCTTTACTTTTATTATTATCTTTACCTGTTTTAGCAGGTGCTATTACTATATTATTA  
ACAGATCGAAATCTTAATACTTCATTTTTTGATCCAGCAGGAGG?GGAGACCTATTCTATATCAA-----

Parnassius\_eversmanni  
ACATTATATTTTATTTTTGGTATTTGAGCAGGTATAGTAGGAACCTCTTTAAGATTATTAATTCGTCTGAATTAGGTAATCCTGGATCTTTAATTG  
GAGATGATCAAATTTATAATACTATTGTAACAGCTCATGCTTTTATTATAATTTTTTTTATAGTTATACCAATTATAATTGGAGGATTTGGAAATTG  
ATTAATTCATTAAATATTAGGAGCTCCAGATATAGCTTTTCCCTCGAATAAAATAATATAAGATTTTGATTATTACCCCTTCATTAACCTTACTAATT  
TCTAGAAGAATTGTAGAAAATGGAGCAGGAACCTGGATGAACGGTTTATCCCCCTTTATCATCTAATATTGCTCATAGAGGAAGATCAGTTGATTTAG  
CTATCTTTTCTTTACATTTAGCTGGAATTTTCATCTATCTTAGGAGCTATTAATTTTATTACAACCTATTATTAATATACGAATTAATCATATATCATT  
TGATCAAATACCCCTTTTTGTATGAGCAGTAGGAATTACTGCTTTACTTTTATTATTATCTTTACCTGTTTTAGCAGGTGCTATTACCATATTATTA  
ACAGATCGAAATCTTAATACTTCATTTTTTGACCCAGCAGGAGGTGGAGATCCTATTTTATATCAA-----

Parnassius\_eversmanni\_felderi  
ACATTATATTTTATTTTTGGTATTTGAGCAGGTATAGTAGGAACCTCTTTAAGATTATTAATTCGTCTGAATTAGGTAATCCTGGATCTTTAATTG  
GAGATGATCAAATTTATAATACTATTGTAACAGCTCATGCTTTTATTATAATTTTTTTTATAGTTATACCAATTATAATTGGAGGATTTGGAAATTG  
ATTAATTCATTAAATATTAGGAGCTCCAGATATAGCTTTTCCCTCGAATAAAATAATATAAGATTTTGATTATTACCCCTTCATTAACCTTACTAATT  
TCTAGAAGAATTGTAGAAAATGGAGCAGGAACCTGGATGAACGGTTTATCCCCCTTTATCATCTAATATTGCTCATAGAGGAAGATCAGTTGATTTAG  
CTATCTTTTCTTTACATTTAGCTGGAATTTTCATCTATCTTAGGAGCTATTAATTTTATTACAACCTATTATTAATATACGAATTAATCATATATCATT  
TGATCAAATACCCCTTTTTGTATGAGCAGTAGGAATTACTGCTTTACTTTTATTATTATCTTTACCTGTTTTAGCAGGTGCTATTACCATATTATTA  
ACAGATCGAAATCTTAATACTTCATTTTTTGACCCAGCAGGAGGTGGAGATCCTATTTTATATCAA-----

Parnassius\_ariadne\_ariadne  
ACATTATATTTTATTTTTGGTATTTGAGCAGGTATAGTAGGAACCTCTTTAAGATTATTAATTCGTACTGAATTAGGTAATCCTGGATCTTTAATTG  
GAGATGATCAAATTTATAATACTATTGTAACAGCTCATGCTTTTATTATAATTTTTTTTATAGTTATACCAATTATAATTGGAGGATTTGGAAATTG  
ATTAATTCCTTTAATATTAGGAGCTCCAGATATAGCTTTTCCCTCGAATAAAATAATATAAGATTTTGATTACTACCCCTTCATTAACCTTTATTAATC  
TCTAGAAGAATTGTAGAAAATGGAGCAGGAACCTGGATGAACAGTTTATCCCCCTTTATCATCTAATATTGCTCATAGAGGAAGTTTCAAGTTGATTTAG  
CCATTTTCTCTTTACATTTAGCAGGAATTTTCATCAATTTTAGGAGCTATTAATTTTATCACAACTATTATTAATATACGAATTAATCATATATCATT  
TGATCAAATACCCCTTTTTGTGTTGAGCAGTAGGAATTACTGCTTTACTTTTATTATTATCTTTACCTGTTTATAGCTGGTGCATTACTATATTATTA  
ACAGATCGAAATCTTAATACTTCATTTTTTGATCCAGCAGGA??GAGATCCTATTTTATATCAA-----

Parnassius\_glacialis\_mikado  
ACATTATATTTTATTTTTGGTATTTGAGCAGGTATAGTAGGAACCTCTTTAAGATTATTAATTCGTACTGAATTAGGTAATCCTGGATCTTTAATTG  
GAGATGATCAAATTTATAATACTATTGTAACAGCTCATGCTTTTATTATAATTTTTTTTATAGTTATACCAATTATAATTGGAGGATTTGGAAATTG  
ATTAATCCCTTTAATATTAGGAGCTCCAGATATAGCTTTCCCCGAATAAAATAATATAAGATTTTGATTATTACCCCTTCATTAACCTTTACTAATT  
TCCAGAAGAATTGTAGAAAATGGAGCAGGAACAGGATGAACAGTTTATCCCCCTTTATCATCTAATATTGCCACAGAGGAAGATCTGTTGATTTAG  
CTATTTTCTTTTACATTTAGCAGGAATTTTCATCTATTTAGGAGCTATTAATTTTATTACAACCTATTATTAATATACGAATTAATCATATATCATT  
TGATCAAATACCTCTCTTTGTTGAGCAGTAGGAATTACTGCTTTACTTTTATTATTATCTTTACCTGTTTATAGCTGGTGCATTACTATATTATTA  
ACAGATCGAAATCTTAATACTTCATTTTTTGACCCAGCAGGAGGTGGAGATCCAATTTTATATCAA-----

Parnassius\_stubbendorfii\_hoenei  
ACATTATATTTTATTTTTGGTATTTGAGCAGGAATAGTAGGAACCTCCCTAAGATTATTAATTCGTACTGAATTAGGTAATCCCGGATCTTTAATTG  
GAGATGATCAAATTTACAATACTATTGTAACAGCTCATGCTTTTATTATAATTTTTTTTATAGTTATACCAATTATAATTGGAGGATTTGGAAATTG  
ACTGATTCCTTTAATATTAGGAGCCCCAGATATAGCTTTCCCCGAATAAAATAATATAAGATTTTGATTACTACCCCTTCATTAACCTTTATTAATT  
TCTAGAAGAATTGTAGAAAATGGAGCAGGAACCTGGATGAACAGTCTATCCCCCTTTATCATCTAATATTGCCATAGAGGAAGATCCGTTGATTTAG  
CTATTTTTTCTTTACATTTAGCAGGAATTTTCATCTATTTTAGGAGCCATTAAATTTTATTACAACCTATTATTAATATACGAATTAATCATATATCATT  
TGATCAAATACCTCTTTTTGTATGAGCAGTAGGAATTACTGCTTTACTTTTATTATTATCTTTACCTGTTTTAGCAGGTGCTATTACTATATTATTA  
ACAGATCGAAATCTTAATACTTCCTTTTTTGACCCAGCAGGAGGTGGAGATCCTATTTTATACCAA-----

Parnassius\_stubbendorfii\_hoenei\_AC20\_16 -----  
TGAGCAGGAATAGTAGGAACCTCCCTAAGATTATTAATTCGTACTGAATTAGGTAATCCCGATCTTTAATTGGAGATGATCAAATTTACAATACTA  
TTGTAACAGCTCATGCTTTTATTATAATTTTTTTTATAGTTATACCAATTATAATTGGAGGATTTGGAAATTGACTGATTCCTTTAATATTAGGAGC  
CCCAGATATAGCTTTTCCCGAATAAAATAATATAAGATTTGATTACTACCCCTTCATTAACCTTTATTAATTTCTAGAAGAATTGTAGAAAATGGA  
GCAGGAACCTGGATGAACAGTCTATCCCCCTTTATCATCTAATATTGCCATAGAGGAAGATCCGTTGATTTAGCTATTTTTTCTTTACATTTAGCAG  
GAATTTTCATCTATTTTAGGAGCCATTAATTTTATTACAACCTATTATTAATATACGAATTAATCATATATCATTGATCAAATACCTCTTTTTGTATG  
AGCAGTAGGAATTACTGCTTTACTTTTATTATTATCTTTACCTGTTTTAGCAGGTGCTATTACTATATTATTAACAGATCGAAATCTTAATACTTCC  
TTTTTTGACCCGCAGGAGGTGGAGATCCTATTTTATACCAACATTTA

Parnassius\_stubbendorfii\_koreanus -----  
TGAGCAGGTATAGTAGGAACCTCTTTAAGATTATTAATTCGTACTGAATTAGGTAATCCTGGATCTTTAATTGGAGATGATCAAATTTATAATACTA  
TTGTAACAGCTCATGCTTTTATTATAATTTTTTTTATAGTTATACCAATTATAATTGGAGGATTTGGAAATTGATTAAATTCCTTTAATATTAGGAGC  
CCCAGATATAGCTTTTCCCTCGAATAAAATAATATAAGATTTGACTATTACCCCTTCATTAACCTTTACTAATTTCCAGAAGAATTGTAGAAAATGGA  
CCCAGATATAGCTTTTCCCTCGAATAAAATAATATAAGATTTGACTATTACCCCTTCATTAACCTTTACTAATTTCCAGAAGAATTGTAGAAAATGGA

GCAGGAACCTGGATGAACAGTCTACCCCTCCTTTATCATCTAATATTGCTCACGGAGGAAGATCTGTTGATTTAGCTATTTTTTCTTACATTTAGCAG  
GAATTTTCATCTATTTTAGGAGCCATTAATTTTATTACAACCTATTATTAATATACGAATTAATCATATATCATTTGATCAAATACCTCTTTTTGTATG  
AGCAGTAGGAATTACTGCTTTACTTTTATTATTATCTCTACCTGTTTTAGCAGGTGCTATTACTATATTATTAACAGATCGAAATCTTAATACTTCA  
TTTTTTGACCCAGCAGGAGGTGGAGATCCTATTTTATATCAACACTTA

Parnassius\_nordmanni\_AC20\_5 -----  
TGAGCAGGTATAGTAGGAACCTCTTTAAGATTATTAATTCGTACTGAATTAGGTAATCCTGGATCTCTAATTGGAGATGATCAAATTTACAATACTA  
TCGTAACAGCTCATGCTTTTATTATAAATTTTTTTCATAGTTATACCAATTATAAATTGGAGGATTTGGAAATTGATTAAATCCATTAAATATTAGGAGC  
TCCAGATATAGCTTTCCCGGAATAAATAATATAAGATTTTGATTATTACCCCTCATTAACCTCTATTAATTTCTAGAAGAATTGTAGAAAATGGG  
GCAGGAACCTGGATGAACAGTTTACCCCTTTATCATCTAATATTGCTCATAGAGGAAGATCAGTTGACTTAGCTATTTTTTCTTTACATTTGGCTG  
GGATTTCTTCTATTTTAGGAGCTATTAATTTTATCACAACATTGTTAATATACGAATTAACATATATCATTTGATCAAATACCTCTTTTCGTATG  
AGCAGTAGGAATTACTGCTTTACTTTTATTATTATCTTTACCTGTTTTAGCAGGTGCTATTACTATATTATTAACAGATCGAAATCTTAATACTTCA  
TTTTTTGATCCAGCAGGAGGTGGAGACCCTATTCTATATCAACATTTA

Parnassius\_eversmanni\_felderi\_AC23\_68 -----  
TGAGCAGGTATAGTAGGAACCTCTTTAAGATTATTAATTCGTCTCTGAATTAGGTAATCCTGGATCTTTAATTGGAGATGATCAAATTTATAATACTA  
TTGTAACAGCTCATGCTTTTATTATAAATTTTTTATAGTTATACCAATTATAAATTGGAGGATTTGGAAATTGATTAAATCCATTAAATATTAGGAGC  
TCCAGATATAGCTTTTCTCGAATAAATAATATAAGATTTTGATTATTACCCCTCATTAACCTTACTAATTTCTAGAAGAATTGTAGAAAATGGA  
GCAGGAACCTGGATGAACGGTTTATCCCTTTATCATCTAATATTGCTCATAGAGGAAGATCAGTTGATTAGCTATCTTTTCTTTACATTTAGCTG  
GAATTTTCATCTATCTTAGGAGCTATTAATTTTATTACAACATTATTAATATACGAATTAATCATATATCATTTGATCAAATACCCCTTTTTGTATG  
AGCAGTAGGAATTACTGCTTTACTTTTATTATTATCTTTACCTGTTTTAGCAGGTGCTATTACCATATTATTAACAGATCGAAATCTTAATACTTCA  
TTTTTTGACCCAGCAGGAGGTGGAGATCCTATTTTATTTCAACATTTA

Parnassius\_eversmanni\_eversmanni\_AC1\_14 -----  
TGATCAGGTATAGTAGGAACCTCTTTAAGATTATTAATTCGTCTCTGAATTAGGTAATCCTGGATCTTTAATTGGAGATGATCAAATTTATAATACTA  
TTGTAACAGCTCATGCTTTTATTATAAATTTTTTATAGTTATACCAATTATAAATTGGAGGATTTGGAAATTGATTAAATCCATTAAATATTAGGAGC  
TCCAGATATAGCTTTTCTCGAATAAATAATATAAGATTTTGATTATTACCCCTCATTAACCTTACTAATTTCTAGAAGAATTGTAGAAAATGGA  
GCAGGAACCTGGATGAACGGTTTATCCCTTTATCATCTAATATTGCTCATAGAGGAAGATCAGTTGATTAGCTATCTTTTCTTTACATTTAGCTG  
GAATTTTCATCTATCTTAGGAGCTATTAATTTTATTACAACATTATTAATATACGAATTAATCATATATCATTTGATCAAATACCCCTTTTTGTATG  
AGCAGTAGGAATTACTGCTTTACTTTTATTATTATCTTTACCTGTTTTAGCAGGTGCTATTACCATATTATTAACAGATCGAAATCTCAATACTTCA  
TTTTTTGACCCAGCAGGAGGTGGAGATCCTATTTTATATCAACATTTA

Parnassius\_clodius\_AC4\_5 -----  
TGAGCAGGAATATTAGGAACCTCTTTAAGATTATTAATTCGTACTGAATTAGGTAATCCTGGATCTTTAATTGGAGATGATCAAATTTATAATACTA  
TTGTAACAGCTCATGCTTTTATCATATAAATTTTTTTCATAGTTATACCAATTATAAATTGGAGGATTTGGAAATTGATTAAATCCATTAAATATTAGGAGC  
TCCAGATATAGCTTTTCTCGAATAAATAATATAAGATTTTGATTATTACCCCTCATTAACCTTTATTAATTTCTAGAAGAATTGTAGAAAATGGA  
GCAGGAACCTGGATGAACAGTTTATCCCTTTATCATCTAATATTGCTCATAGAGGAAGATCAGTTGATTAGCTATTTTTTCTTTACATTTAGCTG  
GAATTTTCATCTATCTTAGGAGCTATTAATTTTATTACAACATTATTAATATACGAATTAATCATATATCATTTGATCAAATACCCCTTTTTGTATG  
AGCAGTAGGAATTACTGCTTTACTTTTATTATTATCTTTACCTGTTTTAGCAGGTGCTATTACCATATTATTAACAGATCGAAATCTTAATACTTCA  
TTTTTTGATCCAGCAGGAGGTGGAGATCCTATTTTATATCAACACTTA

Parnassius\_ariadne\_AC4\_14 -----  
TGAGCAGGTATAGTAGGAACCTCTTTAAGATTATTAATTCGTACTGAATTAGGTAATCCTGGATCTTTAATTGGAGATGATCAAATTTATAATACTA  
TCGTAACAGCTCATGCTTTTATTATAAATTTTTTATAGTTATACCAATTATAAATTGGAGGATTTGGAAATTGATTAAATCCCTTTAATATTAGGAGC  
TCCAGATATAGCTTTTCTCGAATAAATAATATAAGATTTTGATTACTACCCCTCATTAACCTTTATTAATCTCTAGAAGAATTGTAGAAAATGGA  
GCAGGAACCTGGATGAACAGTTTATCCCTTTATCATCTAATATTGCTCATAGAGGAAGTTAGTTGATTAGCCATTTTCTCTTTACATTTAGCAG  
GAATTTTCATCAATTTAGGAGCTATTAATTTTATCACAACATTATTAATATACGAATTAATCATATATCATTTGATCAAATACCCCTTTTTGTGTTG  
AGCAGTAGGAATTACTGCTTTACTATTATTATTATCTTTACCTGTATTAGCTGGTGCTATTACTATATCATTAACAGATCGAAATCTTAATACTTCA  
TTTTTTGATCCAGCAGGAGGTGGAGATCCTATTTTATATCAACACTTA

HQ004911\_RV\_07\_C107\_Romania  
ACACTATATTTTATTTTGGTATTTGAGCAGGTATAGTAGGAACCTCTTTAAGATTATTAATTCGTACTGAATTAGGTAATCCTGGATCTTTAATTG  
GAGATGATCAAATTTATAATACTATTGTAACAGCTCATGCTTTTATTATAAATTTTTTATAGTTATACCAATTATAAATTGGAGGATTTGGAAATTG  
ATTAATTCCTTTAATATTAGGAGCCCCAGATATAGCTTTTCTCGAATAAATAATATAAGATTTTGATTACTACCCCTCATTAACCTTTATTAATT  
TCTAGAAGAATTGTAGAAAATGGAGCAGGAACAGGATGAACAGTTTATCCCTTTATCATCTAATATCGCTCATAGAGGTAGTTAGTTAGTTAG  
CTATTTTTTCTTTACATTTAGCAGGAATTTTCATCAATCTTAGGAGCTATTAATTTTATTACAACATTATTAATATACGAATTAACCATATATCATT  
TGATCAAATACCTCTCTTTGTATGAGCAGTAGGAATTACTGCTTTACTTTTATTATTATCTTTACCTGTATTAGCTGGTGCTATTACTATATTATTA  
ACAGATCGAAATCTTAATACTTCATTTTTTTGATCCTGCAGGAGGTGGAGATCCTATTTTATATCAACATTTA

HQ004908\_RV\_07\_D060\_Romania  
ACACTATATTTTATTTTGGTATTTGAGCAGGTATAGTAGGAACCTCTTTAAGATTATTAATTCGTACTGAATTAGGTAATCCTGGATCTTTAATTG  
GAGATGATCAAATTTATAATACTATTGTAACAGCTCATGCTTTTATTATAAATTTTTTATAGTTATACCAATTATAAATTGGAGGATTTGGAAATTG  
ATTAATTCCTTTAATATTAGGAGCCCCAGATATAGCTTTTCTCGAATAAATAATATAAGATTTTGATTACTACCCCTCATTAACCTTTATTAATT  
TCTAGAAGAATTGTAGAAAATGGAGCAGGAACAGGATGAACAGTTTATCCCTTTATCATCTAATATCGCTCATAGAGGTAGTTAGTTAGTTAG  
CTATTTTTTCTTTACATTTAGCAGGAATTTTCATCAATCTTAGGAGCTATTAATTTTATTACAACATTATTAATATACGAATTAACCATATATCATT  
TGATCAAATACCTCTCTTTGTATGAGCAGTAGGAATTACTGCTTTACTTTTATTATTATCTTTACCTGTATTAGCTGGTGCTATTACTATATTATTA  
ACAGATCGAAATCTTAATACTTCATTTTTTTGATCCTGCAGGAGGTGGAGATCCTATTTTATATCAACATTTA

HQ004907\_RV\_08\_M274\_Romania  
ACACTATATTTTATTTTGGTATTTGAGCAGGTATAGTAGGAACCTCTTTAAGATTATTAATTCGTACTGAATTAGGTAATCCTGGATCTTTAATTG  
GAGATGATCAAATTTATAATACTATTGTAACAGCTCATGCTTTTATTATAAATTTTTTATAGTTATACCAATTATAAATTGGAGGATTTGGAAATTG  
ATTAATTCCTTTAATATTAGGAGCCCCAGATATAGCTTTTCTCGAATAAATAATATAAGATTTTGATTACTACCCCTCATTAACCTTTATTAATT  
TCTAGAAGAATTGTAGAAAATGGAGCAGGAACAGGATGAACAGTTTATCCCTTTATCATCTAATATCGCTCATAGAGGTAGTTAGTTAGTTAG  
CTATTTTTTCTTTACATTTAGCAGGAATTTTCATCAATCTTAGGAGCTATTAATTTTATTACAACATTATTAATATACGAATTAACCATATATCATT  
TGATCAAATACCTCTCTTTGTATGAGCAGTAGGAATTACTGCTTTACTTTTATTATTATCTTTACCTGTATTAGCTGGTGCTATTACTATATTATTA  
ACAGATCGAAATCTTAATACTTCATTTTTTTGATCCTGCAGGAGGTGGAGATCCTATTTTATATCAACATTTA

HQ004902\_RV\_08\_M361\_Romania  
ACACTATATTTTATTTTGGTATTTGAGCAGGTATAGTAGGAACCTCTTTAAGATTATTAATTCGTACTGAATTAGGTAATCCTGGATCTTTAATTG  
GAGATGATCAAATTTATAATACTATTGTAACAGCTCATGCTTTTATTATAAATTTTTTATAGTTATACCAATTATAAATTGGAGGATTTGGAAATTG

ATTAATTCCCTTAATATTAGGAGCCCCAGATATAGCTTTTCCTCGAATAAATAATATAAGATTTTGATTACTACCCCCCTCATTAACCTTTATTAATT  
TCTAGAAGAATTGTAGAAAATGGAGCAGGAACAGGATGAACAGTTTATCCCCCTTTATCATCTAATATCGCTCATAGAGGTAGTTCAGTTGATTTAG  
CTATTTTTTCTTTACATTTAGCAGGAATTTTCATCAATCTTAGGAGCTATTAATTTTATTACAACCTATTATTAATATACGAATTAACCATATATCATT  
TGATCAAATACCTCTCTTTGTATGAGCAGTAGGAATTACTGCTTTACTTTTATTATATCTTTACCTGTATTAGCTGGTGCATTACTATATTATTA  
ACAGATCGAAATCTTAATACTTCATTTTTTGATCCTGCAGGAGGTGGAGATCCTATTTTATATCAACATTTA

GU947642\_Pmme\_ITNEB01\_Italy\_Sicily -----  
-----  
-----

CCCCCTTCATTAACCTTATTAATTTCTAGAAGAATTGTAGAAAATGGAGCAGGAACGGATGAACAGTTTACCCCCCTTTATCATCTAATATTGCTCA  
TAGAGGAAGTTCAGTTGATTAGCTATTTTTTCTTTACATTTAGCGGGAATTTTCATCAATCTTAGGAGCTATTAATTTTATTACAACCTATTATTAAT  
ATACGAATTAATCATATATCATTTCGATCAAATACCTCTTTTTGTATGAGCAGTAGGAATTACTGCTTTACTTTTATTATTATCTTTACCTGTATTAG  
CTGGTGCTATTACTATATTATTAACAGATCGAAATCTTAATACTTCATTTTTTGATCCCGCAGGAGGTGGTGATCCTATTTTATACCAACATTTA

EU093018\_Ca995 -----  
-----  
-----

TTTAATATTAGGAGCCCCAGATATAGCTTTTCCTCGAATAAATAATATAAGATTTTGATTACTGCCCCCTCATTAACCTTTATTAATTTCTAGAAGA  
ATTGTAGAAAATGGAGCAGGAACAGGATGAACAGTTTATCCCCCTTTATCATCTAATATCGCTCATAGAGGTAGTTCAGTTGATTTAGCTATTTTTT  
CTTTACATTTTAGCAGGAATTTTCATCAATCTTAGGAGCTATTAATTTTATTACAACCTATTATTAATATACGAATTAACCATATATCATTGATCAAAT  
ACCTCTCTTTGTATGAGCAGTAGGAATTACTGCTTTACTTTTATTATTATCTTTACCTGTATTAGCTGGTGCATTACTATATTATTAACAGATCGA  
AATCTTAATACTTCATTTTTTGATCCTGCAGGAGGTGGAGATCCTATTTTATATCAACATTTA

EU093017\_Ch892 -----  
-----  
-----

TTTAATATTAGGAGCCCCAGATATAGCTTTCCCCCGAATAAATAATATAAGATTTTGATTACTACCCCCCTCATTAACCTTATTAATTTCTAGAAGA  
ATTGTAGAAAATGGAGCAGGAACGGATGAACAGTTTACCCCCCTTTATCATCTAATATTGCTCATAGAGGAAGTTCAGTTGATTTAGCTATTTTTT  
CCCTACATTTTAGCGGGAATTTTCATCAATCTTAGGAGCTATTAATTTTATTACAACCTATTATCAATATACGAATTAATCATATATCATTCGATCAAAT  
ACCTCTCTTTGTATGAGCAGTAGGAATTACTGCTTTACTTTTATTATTATCTTTACCTGTATTAGCTGGTGCATTACTATATTATTAACAGATCGA  
AATCTTAATACTTCATTTTTTGATCCAGCAGGAGGTGGTGATCCTATTTTATATCAACATTTA

EU093016\_Tk889 -----  
-----  
-----

TTTAATATTAGGAGCCCCAGATATAGCTTTTCCTCGAATAAATAATATAAGATTTTGATTACTACCCCCCTCATTAACCTTTATTAATTTCTAGAAGA  
ATTGTAGAAAATGGAGCAGGAACAGGATGAACAGTTTATCCCCCTTTATCATCTAATATTGCTCATAGAATTAGTTCAGTTGATTTAGCTATTTTTT  
CTTTACATTTTAGCAGGAATTTTCATCAATCTTAGGAGCTATTAATTTTATTACAACCTATTATTAATATACGAATTAATCATATTATCATTTGATCAAAT  
ACCCCTCTTTGTATGAGCAGTAGGAATTACTGCTTTACTTTTATTATTATCTTTACCTGTATTAGCTGGTGCATTACTATATTATTAACAGATCGA  
AATCTTAATACTTCATTTTTTGATCCTGCAGGAGGTGGAGATCCTATTTTATATCAACATTTA

EU093015\_It878 -----  
-----  
-----

TTTAATATTAGGAGCCCCAGATATAGCTTTCCCCCGAATAAATAATATAAGATTTTGATTACTACCCCCCTCATTAACCTTATTAATTTCTAGAAGA  
ATTGTAGAAAATGGAGCAGGAACGGATGAACAGTTTACCCCCCTTTATCATCTAATATTGCTCATAGAGGAAGTTCAGTTGATTTAGCTATTTTTT  
CCTTACATTTTAGCGGGAATTTTCATCAATCTTAGGAGCTATTAATTTTATTACAACCTATTATTAATATACGAATTAATCATATATCATTCGATCAAAT  
ACCTCTCTTTGTATGAGCAGTAGGAATTACTGCTTTACTTTTATTATTATCTTTACCTGTATTAGCTGGTGCATTACTATATTATTAACAGATCGA  
AATCTTAATACTTCATTTTTTGATCCAGCAGGAGGTGGTGATCCTATTTTATACCAACATTTA

EU093014\_Hu875 -----  
-----  
-----

TTTAATATTAGGAGCCCCAGATATAGCTTTTCCTCGAATAAATAATATAAGATTTTGATTACTACCCCCCTCATTAACCTTTATTAATTTCTAGAAGA  
ATTGTAGAAAATGGAGCAGGAACAGGATGAACAGTTTATCCCCCTTTATCATCTAATATCGCTCATAGAGGTAGTTCAGTTGATTTAGCTATTTTTT  
CTTTACATTTTAGCGGGAATTTTCATCAATCTTAGGAGCTATTAATTTTATTACAACCTATTATTAATATACGAATTAATCATATATCATTCGATCAAAT  
ACCTCTCTTTGTATGAGCAGTAGGAATTACTGCTTTACTTTTATTATTATCTTTACCTGTATTAGCTGGTGCATTACTATATTATTAACAGATCGA  
AATCTTAATACTTCATTTTTTGATCCTGCAGGAGGTGGAGATCCTATTTTATATCAACATTTA

EU093013\_Sk872\_Cz\_Slova -----  
-----  
-----

TTTAATATTAGGAGCCCCAGATATAGCTTTTCCTCGAATAAATAATATAAGATTTTGATTACTACCCCCCTCATTAACCTTTATTAATTTCTAGAAGA  
ATTGTAGAAAATGGAGCAGGAACAGGATGAACAGTTTATCCCCCTTTATCATCTAATATCGCTCATAGAGGTAGTTCAGTTGATTTAGCTATTTTTT  
CTTTACATTTTGGCAGGAATTTTCATCAATCTTAGGAGCTATTAATTTTATTACAACCTATTATTAATATACGAATTAATCATATATCATTTGATCAAAT  
ACCTCTCTTTGTATGAGCAGTAGGAATTACTGCTTTACTTTTATTATTATCTTTACCTGTATTAGCTGGTGCATTACTATATTATTAACAGATCGA  
AATCTTAATACTTCATTTTTTGATCCTGCAGGAGGTGGAGATCCTATTTTATATCAACATTTA

EU093011\_Cz869 -----  
-----  
-----

TTTAATATTAGGAGCCCCAGATATAGCTTTTCCTCGAATAAATAATATAAGATTTTGATTACTACCCCCCTCATTAACCTTTATTAATTTCTAGAAGA  
ATTGTAGAAAATGGAGCAGGAACAGGATGAACAGTTTATCCCCCTTTATCATCTAATATTGCTCATAGAGGTAGTTCAGTTGATTTAGCTATTTTTT  
CTTTACATTTTAGCAGGAATTTTCATCAATCTTAGGAGCTATTAATTTTATTACAACCTATTATTAATATACGAATTAACCATATATCATTTGATCAAAT  
ACCTCTCTTTGTATGAGCAGTAGGAATTACTGCTTTACTTTTATTATTATCTTTACCTGTATTAGCTGGTGTATTACTATATTATTAACAGATCGA  
AATCTTAATACTTCATTTTTTGATCCTGCAGGAGGTGGAGATCCTATTTTATATCAACATTTA

EU093010\_Ru\_Bosnia\_Fi\_Bu\_Hu\_Bel\_Po\_Rom\_Ukr\_ -----  
-----  
-----

EU093009\_Kz848

EU093007\_Fi810

EU093004\_Tu999

EU093000 Bu961

EU092998\_Bu951

EU092997 Ru940

EU092996\_Sp924\_Fr

EU092995 Sp923

TTTAATATTAGGAGCCCCAGATATAGCTTTCCTCCCGAATAAATAATATAAGATTTTGATTACTACCCCTTCATTAACTTATTAATTTCTAGAAGA  
ATTGTAGAAATGGAGCAGGAAC TGGATGAACAGTTTATCCCCCTTTATCATCCAATATTGCTCATAGAGGAAGTT CAGTTGATTAGCTATTTTTT  
CCCTACCTTTAGCGGAATTT CATCAATCTTAGGAGCTATTAATTTTATTACAACATATTAATAATACGAATTAATCATATATCATTCGATCAAAT  
ACCTCTTTTTGTGTGACGATTTAGGAATTA TCTGCTTCTTTATTTATTAATCTTCTGATTAAGCTGGTGCTATTACTATATTTAACGGATCGA  
AATCTTAATACTCTCATTTTGTAGGATTC CAGCAGGAGGTTGTGATCCTATTTTATCATCAACATTTA

-----  
TTTAATATTAGGAGCCCCAGATATAGCTTCCCCCAATAAAATATATAAGATTTTGATTACTACCCCTTCATTAACCTTTATTAATTTCTAGAAGA  
ATTGTAGAAAATGGAGCAGGAAC TGATGAACAGTTTACCCCTTTATCATCCAATATTGCTCATAGAGGAAGTTCAGTTGATTAGCTATTTTT  
CCCTACATTTAGCAGGAATTTCAATCAATCTTAGGAGCTATTAATTTTATTACAACATATTATTAATATACGAATTAATCATATATCATTCGATCAAAT  
ACCTCTTTTGTGTGAGCAGTAGGAATTACTGCTTACTTTTATTATTATCTTACCTGATTAGCTGGTGCATTACTATATTATTAACGGATCGA  
AATCTTAATACTTCATTTTTTGATCCAGCAGGAGGTGGTGATCTATTTATATCAACATTTA

-----  
TTTAATATTAGGAGCCCCAGATATAGCTTTCCCCCGAATAAATAATATAAGATTTTGATTACTACCCCTTCATTAACCTTTATTAATTTCTAGAAGA  
ATTGTAGAAAATGGAGCAGGAAC TGGATGAACAGTTTATCCCCCTTTATCATCCAATATTGCTCATAGAGGAAGTTCAAGTTGATTAGCTATTTTT  
CCCTACATTTTAGCAGGAATTTTATCAATCTTAGAGAGCTATTAATTTTTATTACAACATATTATTAATATACGAATTAATCATATATCATTCGATCAAAT  
ACCTCTTTTTGTGTGAGCAGTAGGAATTACTGCTTTACTTTTTATTATTATATCCTTACCTGTATTAGCTGGTGCATTACTATATTATTAACAGATCGA  
AATCTTAATCTTCACTTTTGTGATCCAGCAGGAGGTGGTGATCTCTATTTTATATCAACATTTA  
-----

TTTAATATTAGGAGCCCCAGATATAGCTTCCCCCAATAAATAATATAAGATTTTGATTACTACCCCTTCATTAACCTTTATTAATTTCTAGAAGA  
ATTGTAGAAAATGGAGCAGGAACCTGGATGAACAGTTTACCCCTTTATCATCCAATATTGCTCATAGAGGAAGTTCAGTTGATTAGCTATTTTTT  
CCCTACATTTAGCAGGAATTTCATCAATCTTAGGAGCTATTAATTTTATTAACAATATTATTAATATACGAATTAATCATATATCATTCGATCAAAT  
ACCTCTTTTTGTGTGAGCAGTAGGAATCTAGCTTTACTTTTATTATTATACCTTACCTGTATAGCTGGTGCTATTACTATATTATTAACAGATCGA  
AATATTAATAGTTCATTTTTTGATCCAGCAGGAGGTGGTGATCCTATTTTATATCAACATTTA

-----  
TTTAAATATTAGGAGCCCCAGATATAGCTTTCCCCGAATAAATAATATAAGATTTTGATTACTACCCCTTCATTAACCTTATTAATTTCTAGAAGA  
ATTGTAGAAAATGGAGCAGGAACCTGGATGAACAATTTACCCCCCTTTATCATCCAATATTGCTCATAGAGGAAGTTCAGTTGATTAGCTATTTTTT  
CCCTACATTTTAGCAGGAATTTTCATCAATCTTAGGAGCTTATTAATTTTATTACAACATTTATTAAATATACGAATTAATCATATATCATTCGATCAAAT  
ACCTCTTTTGTGTGAGCAGTAGGAATTAAGTCTTACTTTTATTATTATCTTACCTGTATATTAGCTGGTGCATTACTATATTATTAACAGATCGA  
AATCTTAATAACTCATTTTTTTGATCCAGCAGGAGGTGGTGATCTTATTTATATCATCAACATTTA

-----  
TTTAATATTAGGAGCCCCAGATATAGCTTCCCCCGAATAAATAATATAAGATTTTGATTACTACCCCTTCATTAACCTTTATTAATTTCTAGAAGA  
ATTGTAGAAAAATGGAGCAGGAAC TGATGAACAGTTTACCCCCCTTTATCATCTAATATTGCTCATAGAGGAAGTTTCAGTTGATTTAGCTATTTTTT  
CCTTACATTTAGCAGGAAATTCATCAATCTTAGGAGCTATTAATTTTATTACAACATTTATTAATATATACGAATTAATCATATATCATTCGATCAAAT  
ACCTCTTTTTTGATGAGCAGTAGGAATTA CTGCTTACTTTTATTATTATCATTAACCTGTATTAAGCTGGTGCTATTACTATATTATTAACAGATCGA  
AATCTTAATAACTCATTTTTTGATCCAGCAGGGGGTGGTGATCCTATTATATATCAACATTTA

-----  
TTTAATATTAGGAGCCCCAGATATAGCTTTCCTCCCGAATAAAATATATAAGATTTTGATTACTACCCCTTCATTAACCTTATTAATTTCTAGAAGA  
ATTGTAGAAAATGGAGCAGGAACCTGGATGAACAGTTTACCCCCCTTTATCATCTAATATTGCTCATAGAGGAAGTTCAGTTGATTTAGCTATTTTTT  
CCCTACATTTAGCGGGGAATTTCATCAATCTTAGGAGCTATTAATTTTATTACAACATTTATTAATATACGAATTAATCATATATCATTTGATCAAAT  
ACCTCTTTTGTATGAGCAGTAGGAATTACTGCTTTACTTTTATTATTATCTTACCTTGATTAAGCTGGTGCTATTACTATATTATTAACAGATCGA  
AATCTTAATACTCTCATTTTTTGTATCCAGCAGGAGGTGGTGATCTTATTATATATCAACATTTA

-----  
TTTAAATTATTAGGAGCCCCAGATATAGCTTTCCCCCGAATAAATAATATAAGATTTTGATTACTACCCCTTCATTAACCTTATTAATTTCTAGAAGA  
ATTGTAGAAAAATGGAGCAGGAAC TGGAAGAAGTTTACCCCCCTTTATCATCTAATATTGCTCATAGAGGAAGTTCAGTTGATTAGCTATTTTTT  
CCCTACATTTAGCGGGAATTTCACTAATCTTAGGAGCTATTAATTTTATTACAACATTTATTAATAATACGAATTAATCATATATCATTCGATCAAAT  
ACCTCTTTTGTATGAGCAGTAGGAATTAAGTCTTTACTTTTATTATTTATCTTACCTGTATTTAGCTGGTGCATTACTATATTTAATTAACAGATCGA  
AATCTTAATAACTCTCATTTTGTATCCAGCAGGAGGTGGTGATCTCATTTATTAATCAACATTTA  
-----

-----  
TTTAATATTAGGAGCCCCAGATATAGCTTTCCCCCGAATAAATAATATAAGATTTTGATTACTACCCCTTCATTAACCTTATTAATTTCTAGAAGA  
ATTGTAGAAAAATGGAGCAGGAAC TGGATGAACAGTTTACCCCCCTTTATCATCTAATATTGCTCATAGAGGAAGTTTCAGTTGATTAGCTATTTTTT  
CCTTACATTTTAGCAGGAATTTTCATCAATCTTAGGAGCTTATTAATTTTATTACAACATTTATTAAATATACGAATTAATCATATATCATTCGATCAAAT  
ACCTCTTTTGTATGAGCAGTAGGAATTAAGTCTTACTTTATTTATTTATCATTAACCTGTATTAGCTGGTGCATTACTATATTTAAACAGATCGA  
AATCTTAATAACTCATTTTTTTGATCCAGCAGGAGGTGGTGATCTTATTTATTAACAACATTTA  
-----

-----  
TTTAAATATTAGGAGCCCCAGATATAGCTTTCCCCCGAATAAATAATATAAGATTTTGATTACTACCCCTTCATTAACCTTATTAATTTCTAGAAGA  
ATTGTAGAAAAATGGAGCAGGAAC TGGATGAACAGTTTACCCCCCTTTATCATCTAATATTGCTCATAGAGGAAGTTTCAGTTGATTAGCTATTTTTT  
CCTTACATTTTAGCAGGAAATTCATCAATCTTAGGAGCTATTAATTTTTATTACAAC TATTATTAATATACGAATTAATCATATATCATTCGATCAAAT  
ACCTCTTTTGTATGAGCAGTAGGAATTA CTGCTTACTCTTATTATTATTCATTAACCTGTATTAAGCTGGTGCTATTACTATATTATTAACAGATCGA  
AATCTTAATAACTCTCATTTTGTATCCAGCAGGGGGTGGTGATCCTATTATTAATCAACATTTA  
-----

EU092983\_Ch765

TTTAATATTAGGAGCCCCAGATATAGCTTTCCCCGAATAAATAATATAAGATTTTGATTACTACCCCCCTCATTAACCTTTATTAATTTCTAGAAGA  
ATTGTAGAAAATGGAGCAGGAACCTGGATGAACAGTTTACCCCCCTTATCATCTAATATTGCTCATAGAGGAAGTTCAGTTGATTTTAGCTATTTTTT  
CCCTACATTTAGCAGGAATTTTCATCAATCTTAGGAGCTATTAATTTTATTACAACATTATTATTAATATACGAATTAATCATATATCATTTGATCAAAT  
ACCTCTTTTTGTATGAGCAGTAGGAATTACTGCTTTACTTTTATTATTATCTTTACCTGTATTAGCTGGTGCCTATTACTATATTATTAACAGATCGA  
AATCTTAATACTTCATTTTTTTGATCCAGCAGGAGGTGGTGATCCTATTTTATATCAACATTTA

EU092982\_Pl653\_Slova\_Ukr

TTTAATATTAGGAGCCCCAGATATAGCTTTTCCTCGAATAAATAATATAAGATTTTGATTACTACCCCCCTCATTAACCTTTATTAATTTCTAGAAGA  
ATTGTAGAAAATGGAGCAGGAACAGGATGAACAATTTATCCCCCTTATCATCTAATATCGCTCATAGAGGTAGTTCAGTTGATTTAGCTATTTTTT  
CTTTACATTTAGCAGGAATTTTCATCAATCTTAGGAGCTATTAATTTTATTACAACATTATTATTAATATACGAATTAACCATATATCATTTGATCAAAT  
ACCTCTCTTTGTATGAGCAGTAGGAATTACTGCTTTACTTTTATTATTATCTTTACCTGTATTAGCTGGTGCCTATTACTATATTATTAACAGATCGA  
AATCTTAATACTTCATTTTTTTGATCCTGCAGGAGGTGGAGATCCTATTTTATATCAACATTTA

EU092981\_At626

TTTAATATTAGGAGCCCCAGATATAGCTTTTCCTCGAATAAATAATATAAGATTTTGATTACTACCCCCCTCATTAACCTTTATTAATTTCTAGAAGA  
ATTGTAGAAAATGGAGCAGGAACAGGATGAACAGTTTATCCCCCTTATCATCTAATATCGCTCATAGAGGTAGTTCAGTTGATTTAGCTATTTTTT  
CTTTACATTTAGCAGGAATTTTCATCAATCTTAGGAGCTATTAATTTTATTACAACATTATTATTAATATACGAATTAACCATATATCATTTGATCAAAT  
ACCTCTCTTTGTATGAGCAGTAGGAATTACTGCTTTACTTTTATTATTATCTTTACCTGTATTAGCTGGTGCCTATTACTATATTATTAACAGATCGA  
AATCTTAATACTTCATTTTTTTGATCCTGCAGGAGGTGGAGATCCTATTTTATATCAACATTTA

EU092980\_At622

TTTAATATTAGGAGCCCCAGATATAGCTTTTCCTCGAATAAATAATATAAGATTTTGATTACTACCCCCCTCATTAACCTTTATTAATTTCTAGAAGA  
ATTGTAGAAAATGGAGCAGGAACAGGATGAACAGTTTATCCCCCTTATCATCTAATATTGCTCATAGAGGTAGTTCAGTTGATTTAGCTATTTTTT  
CTTTACATTTAGCAGGAATTTTCATCAATCTTAGGAGCTATTAATTTTATTACAACATTATTATTAATATACGAATTAACCATATATCATTTGATCAAAT  
ACCTCTCTTTGTATGAGCAGTAGGAATTACTGCTTTACTTTTATTACTATCTTTACCTGTATTAGCTGGTGCCTATTACTATATTATTAACAGATCGA  
AATCTTAATACTTCATTTTTTTGATCCTGCAGGAGGTGGAGATCCTATTTTATATCAACATTTA

EU092978\_At618\_At\_Slo

TTTAATATTAGGAGCCCCAGATATAGCTTTTCCTCGAATAAATAATATAAGATTTTGATTACTACCCCCCTCATTAACCTTTATTAATTTCTAGAAGA  
ATTGTAGAAAATGGGGCAGGAACAGGATGAACAGTTTATCCCCCTTATCATCTAATATCGCTCATAGAGGTAGTTCAGTTGATTTAGCTATTTTTT  
CTTTACATTTAGCAGGAATTTTCATCAATCTTAGGAGCTATTAATTTTATTACAACATTATTATTAATATACGAATTAACCATATATCATTTGATCAAAT  
ACCTCTCTTTGTATGAGCAGTAGGAATTACTGCTTTACTTTTATTATTATCTTTACCTGTATTAGCTGGTGCCTATTACTATATTATTAACAGATCGA  
AATCTTAATACTTCATTTTTTTGATCCTGCAGGAGGTGGAGATCCTATTTTATATCAACATTTA

EU092977\_At606\_At\_Cz\_D\_Fi\_Hu\_Po\_Slova

TTTAATATTAGGAGCCCCAGATATAGCTTTTCCTCGAATAAATAATATAAGATTTTGATTACTACCCCCCTCATTAACCTTTATTAATTTCTAGAAGA  
ATTGTAGAAAATGGAGCAGGAACAGGATGAACAGTTTATCCCCCTTATCATCTAATATTGCTCATAGAGGTAGTTCAGTTGATTTAGCTATTTTTT  
CTTTACATTTAGCAGGAATTTTCATCAATCTTAGGAGCTATTAATTTTATTACAACATTATTATTAATATACGAATTAACCATATATCATTTGATCAAAT  
ACCTCTCTTTGTATGAGCAGTAGGAATTACTGCTTTACTTTTATTATTATCTTTACCTGTATTAGCTGGTGCCTATTACTATATTATTAACAGATCGA  
AATCTTAATACTTCATTTTTTTGATCCTGCAGGAGGTGGAGATCCTATTTTATATCAACATTTA

EU092976\_At602

TTTAATATTAGGAGCCCCAGATATAGCTTTTCCTCGAATAAATAATATAAGATTTTGATTACTACCCCCCTCATTAACCTTTATTAATTTCTAGAAGA  
ATTGTAGAAAATGGAGCAGGAACAGGATGAACAGTTTATCCCCCTTATCATCTAATATTGCTCATAGAGGTAGTTCAGTTGATTTAGCTATTTTTT  
CTTTACATTTAGTAGGAATTTTCATCAATCTTAGGAGCTATTAATTTTATTACAACATTATTATTAATATACGAATTAACCATATATCATTTGATCAAAT  
ACCTCTCTTTGTATGAGCAGTAGGAATTACTGCTTTACTTTTATTATTATCTTTACCTGTATTAGCTGGTGCCTATTACTATATTATTAACAGATCGA  
AATCTTAATACTTCATTTTTTTGATCCTGCAGGAGGTGGAGATCCTATTTTATATCAACATTTA

EU092975\_D757

TTTAATATTAGGAGCCCCAGATATAGCTTTTCCTCGAATAAATAATATAAGATTTTGATTACTACCCCCCTCATTAACCTTTATTAATTTCTAGAAGA  
ATTGTAGAAAATGGAGCAGGAACAGGATGAACAGTTTATCTTCTTTATCATCTAATATTGCTCATAGAGGTAGTTCAGTTGATTTAGCTATTTTTT  
CTTTACATTTAGCAGGAATTTTCATCAATCTTAGGAGCTATTAATTTTATTACAACATTATTATTAATATACGAATTAACCATATATCATTTGATCAAAT  
ACCTCTCTTTGTATGAGCAGTAGGAATTACTGCTTTACTTTTATTATTATCTTTACCTGTATTAGCTGGTGCCTATTACTATATTATTAACAGATCGA  
AATCTTAATACTTCATTTTTTTGATCCTGCAGGAGGTGGAGATCCTATTTTATATCAACATTTA

EU092974\_D756

TTTAATATTAGGAGCCCCAGATATAGCTTTTCCTCGAATAAATAATATAAGATTTTGATTACTACCCCCCTCATTAACCTTTATTAATTTCTAGAAGA  
ATTGTAGAAAATGGAGCAGGAACAGGATGAACAATTTATCCCCCTTATCATCTAATATTGCTCATAGAGGTAGTTCAGTTGATTTAGCTATTTTTT  
CTTTACATTTAGCAGGAATTTTCATCAATCTTAGGAGCTATTAATTTTATTACAACATTATTATTAATATACGAATTAACCATATATCATTTGATCAAAT



ACCTCTCTTTGTATGAGCAGTAGGAATTACTGCTTTACTTTTATTATTATCTTTACCTGTATTAGCTGGTGCTATTACTATATTATTAACAGATCGA  
AATCTTAATACTTCATTTTTTTGATCCTGCAGGAGGTGGAGATCCTATTTTATATCAACATTTA

EU092973\_D744 -----  
-----  
TTTAATATTAGGAGCCCCAGATATAGCTTTTCCTCGAATAAAATAATATAAGATTTTGATTACTACCCCCCTCATTAACCTTTATTAATTTCTAGAAGA  
ATTGTAGAAAATGGAGCAGGAACAGGATGAACGGTTTATCCCCCTTTATCATCTAATATTGCTCATAGAGGTAGTTCAGTTGATTTAGCTATTTTTT  
CTTTACATTTAGCAGGAATTTTCATCAATCTTAGGAGCTATTAATTTTATTACAACATTATTATAATATACGAATTAACCATATATCATTTGATCAAAT  
ACCTCTCTTTGTATGAGCAGTAGGAATTACTGCTTTACTTTTATTATTATCTTTACCTGTATTAGCTGGTGCTATTACTATATTATTAACAGATCGA  
AATCTTAATACTTCATTTTTTTGATCCTGCAGGAGGTGGAGATCCTATTTTATATCAACATTTA

EU092971\_Hu697\_Bu\_Hu -----  
-----  
TTTAATATTAGGAGCCCCAGATATAGCTTTTCCTCGAATAAAATAATATAAGATTTTGATTACTACCCCCCTCATTAACCTTTATTAATTTCTAGAAGA  
ATTGTAGAAAATGGAGCAGGAACAGGATGAACAGTTTATCCCCCTTTATCATCTAATATCGCTCATAGAGGTAGTTCAGTTGATTTAGCTATTTTTT  
CTTTACATTTAGCAGGAATTTTCATCAATCTTAGGAGCTATTAATTTTATTACAACATTATTATAATATACGAATTAACCATATATCATTTGATCAAAT  
ACCTCTCTTTGTATGAGCAGTAGGAATTACTGCTTTACTTTTATTATTATCTTTACCTGTATTAGCTGGTGCTATTACTATATTATTAACAGATCGA  
AATCTTAATACTTCATTTTTTTGATCCTGCAGGAGGTGGAGATCCTATTTTATATCAACATTTA

EU092969\_Bu775 -----  
-----  
TTTAATATTAGGAGCCCCAGATATAGCTTTTCCTCGAATAAAATAATATAAGATTTTGATTACTACCCCCCTCATTAACCTTTATTAATTTCTAGAAGA  
ATTGTAGAAAATGGAGCAGGAACAGGATGAACAGTTTATCCCCCTTTATCATCTAATATCGCTCATAGAGGTAGTTCAGTTGATTTAGCTATTTTTT  
CTTTACATTTAGCAGGAATTTTCATCAATCTTAGGAGCTATTAATTTTATTACAACATTATTATAATATACGAATTAACCATATATCATTTGATCAAAT  
ACCTCTCTTTGTATGAGCAGTAGGAATTACTGCTTTACTTTTATTATTATCTTTACCTGTATTAGCTGGTGCTATTACTATATTATTAACAGATCGA  
AATCTTAATACTTCATTTTTTTGATCCTGCAGGAGGTGGAGATCCTATTTTATATCAACATTTA

EU092968\_Bu772 -----  
-----  
TTTAATATTAGGAGCCCCAGATATAGCTTTTCCTCGAATAAAATAATATAAGATTTTGATTACTACCCCCCTCATTAACCTTTATTAATTTCTAGAAGA  
ATTGTAGAAAATGGAGCAGGAACAGGATGAACAGTTTATCCCCCTTTATCATCTAATATCGCTCATAGAGGTAGTTCAGTTGATTTAGCTATTTTTT  
CTTTACATTTAGCAGGAATTTTCATCAATCTTAGGAGCTATTAATTTTATTACAACATTATTATAATATACGAATTAACCATATATCATTTGATCAAAT  
ACCTCTCTTTGTATGAGCAGTAGGAATTACTGCTTTACTTTTATTATTATCTCTACCTGTATTAGCTGGTGCTATTACTATATTATTAACAGATCGA  
AATCTTAATACTTCATTTTTTTGATCCTGCAGGAGGTGGAGATCCTATTTTATATCAACATTTA

EU093003\_D982 -----  
-----  
TTTAATATTAGGAGCCCCAGATATAGCTTTTCCTCGAATAAAATAATATAAGATTTTGATTACTACCCCCCTCATTAACCTTTATTAATTTCTAGAAGA  
ATTGTAGAAAATGGAGCAGGAACAGGATGAACAGTTTATCCCCCTTTATCATCTAATATTGCTCATAGAGGTAGTTCAGTTGATTTAGCTATTTTTT  
CTTTACATTTAGCAGGAATTTTCATCAATCTTAGGAGCTATTAATTTTATTACAACATTATTATAATATACGAATTAACCATATATCATTTGATCAAAT  
ACCTCTCTTTGTATGGGCAGTAGGAATTACTGCTTTACTTTTATTATTATCTCTACCTGTATTAGCTGGTGCTATTACTATATTATTAACAGATCGA  
AATCTTAATACTTCATTTTTTTGATCCTGCAGGAGGTGGAGATCCTATTTTATATCAACATTTA

DQ407769\_UP\_100\_F  
ACATTATATTTTATTTTGGTATTTGAGCAGGTATAGTAGGAACCTCTTTAAGATTATTAATTCGTACTGAATTAGGTAATCCTGGATCTTTAATTG  
GAGATGATCAAATTTATAAATACTATTGTAACAGCTCATGCTTTTATTATAATTTTTTTTATAGTTATACCAATTATAAATTGGAGGATTTGGAAATTG  
ATTAATTCCTTTAATATTAGGAGCCCCAGATATAGCTTTCCCCCGAATAAAATAATATAAGATTTTGATTACTACCCCCCTCATTAACCTTATTAATT  
TCTAGAAGAATTGTAGAAAATGGAGCAGGAACCTGGATGAACAGTTTACCCCCCTTTATCATCTAATATTGCTCATAGAGGAAGTTCAGTTGATTTAG  
CTATTTTTTCTTTACATTTAGCAGGAATTTTCATCAATCTTAGGAGCTATTAATTTTATTACAACATTATTATAATATACGAATTAATCATATATCATT  
CGATCAAATACCTCTTTTTGTATGAGCAGTAGGAATTACTGCTTTACTCTTATTATTATCATTTACCTGTATTAGCTGGTGCTATTACTATATTATTA  
ACAGATCGAAATCTTAATACTTCATTTTTTTGATCCAGCAGGGGGTGGTGA-----

AM231426\_W336\_parvisi\_Gre  
ACACTATATTTTATTTTGGTATTTGAGCAGGTATAGTAGGAACCTCTTTAAGATTATTAATTCGTACTGAATTAGGTAATCCTGGATCTTTAATTG  
GAGATGATCAAATTTATAAATACTATTGTAACAGCTCATGCTTTTATTATAATTTTTTTTATAGTTATACCAATTATAAATTGGAGGATTTGGAAATTG  
ATTAATTCCTTTAATATTAGGAGCCCCAGATATAGCTTTTCCTCGAATAAAATAATATAAGATTTTGATTACTACCCCCCTCATTAACCTTTATTAATT  
TCTAGAAGAATTG?????????????????GGATGAACAGTTTATCCCCCTTTATCATCTAATATCGCTCATAGAGGTAGTTCAGTTGATTTAG  
CTATTTTTTCTTTACATTTAGCAGGAATTTTCATCAATCTTAGGGGCTATTAATTTTATTACAACATTATTATAATATACGAATTAACCATATATCATT  
TGATCAAATACCTCTCTTTGTATGAGCAGTAGGAATTACTGCTTTACTTTTATTATTATCTTTACCTGTATTAGCTGGTGCTATTACTATATTATTA  
ACAGATCGAAATCTTAATACTTCATTTTTTTGATCTGTCAGGAGGTGGAGATCCTATTTTATATCAA-----

AM231425\_W333\_angorae\_Tur  
ACACTATATTTTATTTTGGTATTTGAGCAGGTATAGTAGGAACCTCTTTAAGATTATTAATTCGTACTGAATTAGGTAATCCTGGATCTTTAATTG  
GGGATGATCAAATTTATAAATACTATTGTAACAGCTCATGCTTTTATTATAATTTTTTTTATAGTTATACCAATTATAAATTGGAGGATTTGGAAATTG  
ATTAATTCCTTTAATATTAGGAGCCCCAGATATAGCTTTTCCTCGAATAAAATAATATAAGATTTTGATTATTACCCCCCTCATTAACCTTTATTAATT  
TCTAGAAGAATTG?????????????????GGATGAACAGTTTATCCCCCTTTATCATCTAATATCGCTCATAGAGGTAGTTCAGTTGATTTAG  
CTATTTTTTCTTTACATTTAGCAGGAATTTTCATCAATCTTAGGAGCTATTAATTTTATTACAACATTATTATAATATACGAATTAATCATATATCATT  
TGATCAAATACCCCTTTTTGTATGGGCAGTAGGAATTACTGCTTTACTTTTATTATTATCTTTACCTGTATTAGCTGGTGCTWTWTACTATATTATTA  
ACAGATCGAAATCTTAATACTTCATTTTTTTCGATCCCGCAGGAGGTGGGATCCTATTTTATATCAA-----

AM231424\_W331\_angorae\_Tur\_Ankara  
ACACTATATTTTATTTTGGTATTTGAGCAGGTATAGTAGGAACCTCTTTAAGATTATTAATTCGTACTGAATTAGGTAATCCTGGATCTTTAATTG  
GAGATGATCAAATTTATAAATACTATTGTAACAGCTCATGCTTTTATTATAATTTTTTTTATAGTTATACCAATTATAAATTGGAGGATTTGGAAATTG  
ATTAATTCCTTTAATATTAGGAGCCCCAGATATAGCTTTTCCTCGAATAAAATAATATAAGATTTTGATTATTACCCCCCTCATTAACCTTTATTAATT  
TCTAGAAGAATTGTAT?????????????????GGATGAACAGTTTATCCCCCTTTATCATCTAATATCGCTCATAGAGGTAGTTCAGTTGATTTAG

CTATTTTTCTTTACATTTAGCAGGAATTTTCATCAATCTTAGGAGCTATTAATTTTTATTACAACCTATTATTAATATACGAATTAACCATATATCATT  
TGATCAAATACCTCTCTTTGTATGAGCAGTAGGAATTACCCTTTACTTTTTATTATTATCTTTACCTGTATTAGCTGGTGCATTACTATATTATTA  
ACAGATCGAAATCTTAATACTTCATTTTTGTATCTGCAGGAGGTGGAGATCCTATTTTATATCAA-----

AM231423\_W329\_gigantea\_Uzb\_Chatkal  
ACACTATATTTTATTTTTGGTATTTGAGCAGGTATAGTAGGAACCTCTTTAAGATTATTAATTCGTACTGAATTAGGTAATCCTGGATCTTTAATTG  
GAGATGATCAAATTTATAAATACTATTGTAACAGCTCATGCTTTTATTATAATTTTTTTTATAGTTATACCAATTATAAATTGGAGGATTGGAAATTG  
ATTAATTCCTTTAATATTAGGAGCCCCAGATATAGCTTTTCTCGAATAAATAATATAAGATTTTGATTATTACCCCTTCATTAACCTTTATTAATT  
TCTAGAAGAATTG????????????????GGATGAACAGTTTATCCCCCTTATCATCTAATATCGCTCATAGAGGTAGTTCAGTTGATTTAG  
CTATTTTTCTTTACATTTAGCAGGAATTTTCATCAATCTTAGGAGCTATTAATTTTTATTACAACCTATTATTAATATACGAATTAATCATATATCATT  
TGATCAAATACCTCTCTTTGTATGAGCAGTAGGAATTACTGCTTTACTTTTTATTACTATCTTTACCTGTATTAGCTGGTGCATTACTATATTATTA  
ACAGATCGAAATCTTAATACTTCATTTTTGTATCTGCAGGAGGTGGAGATCCTATTTTATATCAA-----

AM231422\_W330\_orientalis\_Zailiyskiy  
ACACTATATTTTATTTTTGGTATTTGAGCAGGTATAGTAGGAACCTCTTTAAGATTATTAATTCGTACTGAATTAGGTAATCCTGGATCTTTAATTG  
GAGATGATCAAATTTATAAATACTATTGTAACAGCTCATGCTTTTATTATAATTTTTTTTATAGTTATACCAATTATAAATTGGAGGATTGGAAATTG  
ATTAATTCCTTTAATATTAGGGGCCCCAGATATAGCTTTTCTCGAATAAATAATATAAGATTTTGATTATTACCCCTTCATTAACCTTTATTAATT  
TCTAGAAGAATTGTAGAAAATGGAGCAGGAACAGGATGAACAGTTTATCCCCCTTATCATCTAATATCGCTCATAGAGGTAGTTCAGTTGATTTAG  
CTATTTTTCTTTACATTTAGCGGGAATTTTCATCAATCTTAGGAGCTATTAATTTTTATTACAACCTATTATTAATATACGAATTAATCATATATCATT  
TGATCAAATACCTCTCTTTGTATGAGCAGTAGGAATTACTGCTTTACTTTTTATTACTATCTTTACCTGTATTAGCTGGTGCATTACTATATTATTA  
ACAGATCGAAATCTTAATACTTCATTTTTGTATCTGCAGGAGGTGGAGATCCTATTTTATATCAA-----

AM231421\_W292\_ochracea\_Tadj\_Zeravsh  
ACACTATATTTTATTTTTGGTATTTGAGCAGGTATAGTAGGAACCTCTTTAAGATTATTAATTCGTACTGAATTAGGTAATCCTGGATCTTTAATTG  
GAGATGATCAAATTTATAAATACTATTGTAACAGCTCATGCTTTTATTATAATTTTTTTTATAGTTATACCAATTATAAATTGGAGGATTGGAAATTG  
ATTAATTCCTTTAATATTAGGAGCCCCAGATATAGCTTTTCTCGAATAAATAATATAAGATTTTGATTACTACCCCTTCATTAACCTTTATTAATT  
TCCAGAAGAATTGTAGAAAATGGAGCAGGAACAGGATGAACAGTTTATCCCCCTTATCATCTAATATCGCTCATAGAGGTAGTTCAGTTGATTTAG  
CTATTTTTCTTTACATTTAGCAGGAATTTTCATCAATTTTAGGAGCTATTAATTTTATTACAACCTATTATTAATATACGAATTAACCATATATCATT  
TGATCAAATACCCCTCTTTGTATGAGCAGTAGGAATTACTGCTTTACTTTTTATTATATCTTTACCTGTATTAGCTGGTGCATTACTATATTATTA  
ACAGATCGAAATCTTAATACTTCATTTTTGTATCTGCAGG?GTGGAGATCCTATTTTATATCAA-----

AM231420\_W280\_farsica\_Iran\_Fars  
ACACTATATTTTATTTTTCGGTATTTGAGCAGGTATAGTAGGAACCTCTTTAAGATTATTAATTCGTACTGAATTAGGTAATCCTGGATCTTTAATTG  
GAGATGATCAAATTTATAAATACTATTGTAACAGCTCATGCTTTTATTATAATTTTTTTTATAGTTATACCAATTATAAATTGGAGGATTGGAAATTG  
ATTAATTCCTTTAATATTAGGAGCTCCAGATATAGCTTTTCCCGAATAAATAATATAAGATTTTGATTACTACCCCTTCATTAACCTTTATTAATT  
TCTAGAAGAATTGTAGAAAATGGAGCAGGAACAGGATGAACAGTTTATCCCCCTTATCATCTAATATTGCCACAGAGGTAGTTCAGTTGATTTAG  
CTATTTTTCTTTACATTTAGCAGGAATTTTCATCAATTTTAGGAGCTATTAATTTTATTACAACCTATTATTAATATACGAATTAATATATATCATT  
TGATCAAATACCTCTTTTGTATGAGCAGTAGGAATTACAGCATTACTTTTTATTATATCTTTACCTGTATTAGCTGGTGCATTACTATATTATTA  
ACAGATCGAAATCTTAACACTTCATTTTTGTATCCTGCA??GTGGGGATCCTATTTTATATCAA-----

AM231419\_W311\_pseudonubilosus\_Iran\_Urmia  
ACACTATATTTTATTTTTCGGTATTTGAGCGGGTATAGTAGGAACCTCTTTAAGATTATTAATTCGTACTGAATTAGGTAATCCTGGATCTTTAATTG  
GAGATGATCAAATTTATAAATACTATTGTAACAGCTCATGCTTTTATTATAATTTTTTTTATAGTTATACCAATTATAAATTGGAGGATTGGAAATTG  
ATTAATTCCTTTAATATTAGGAGCTCCAGATATAGCTTTTCTCGAATAAATAATATAAGATTTTGATTACTACCCCTTCATTAACCTTTATTAATT  
TCTAGAAGAATTGTAGAAAATGGAGCAGGAACAGGATGAACAATTTATCCCCCTTATCATCTAATATTGCTCATAGAGGTAGTTCAGTTGATTTAG  
CTATTTTTCTTTACATTTAGCAGGAATTTTCATCAATCTTAGGAGCTATTAATTTTATTACAACCTATTATTAACATACGAATTAATCATATATCATT  
TGATCAAATACCTCTTTTGTATGAGCAGTAGGAATTACTGCATTACTTTTTATTATATCTTTACCTGTATTAGCTGGTGCATTACTATATTATTA  
ACAGATCGAAATCTTAATACTTCATTTTTGTATCTGCAGGA?GTGGAGATCCTATTTTATATCAA-----

AM231418\_W335\_sheljuzhkoi\_Tur\_Adana  
ACACTATATTTTATTTTTGGTATTTGAGCAGGTATAGTAGGAACCTCTTTAAGATTATTAATTCGTACTGAATTAGGTAATCCTGGATCTTTAATTA  
GAGATGATCAAATTTATAAATACTATTGTAACAGCTCATGCTTTTATTATAATTTTTTTTATAGTTATACCAATTATAAATTGGAGGATTGGAAATTG  
ATTAATTCCTTTAATATTAGGAGCTCCAGATATAGCTTTTCTCGAATAAATAATATAAGATTTTGATTACTACCCCTTCATTAACCTTTATTAATT  
TCTAGAAGAATTG????????????????GGATGAACAGTTTATCCCCCTTATCATCTAATATTGCTCATAGAGGTAGTTCAGTTGATTTAG  
CTATTTTTCTTTACATTTAGCAGGAATTTTCATCAATCTTAGGAGCTATTAATTTTATTACAACCTATTATTAATATACGAATTAATATATATCATT  
TGATCAAATACCTCTTTTGTATGAGCAGTAGGAATTACTGCATTACTTTTTATTATATCCCTACCTGTATTAGCTGGTGCATTACTATATTATTA  
ACAGATCGAAATCTTAATACTTCATTTTTGTATCCGCAGGAGGTGGAGATCCTATTTTATATCAA-----

AM231417\_W78\_parmenides\_Fr  
ACATTATATTTTATTTTTGGTATTTGAGCAGGTATAGTAGGAACCTCTTTAAGATTATTAATTCGTACTGAATTAGGTAATCCTGGATCTTTAATTG  
GAGATGATCAAATTTATAAATACTATTGTAACAGCTCATGCTTTTATTATAATTTTTTTTATAGTTATACCAATTATAAATTGGAGGATTGGAAATTG  
ATTAATTCCTTTAATATTAGGAGCCCCAGATATAGCTTTCCCCGAATAAATAATATAAGATTTTGATTACTACCCCTTCATTAACCTTTATTAATT  
TCTAGAAGAATTGTAGAAAATGGAGCAGGAACAGGATGAACAGTTTATCCCCCTTATCATCTAATATTGCTCATAGAGGAAGTTCAGTTGATTTAG  
CTATTTTTCTTTACATTTAGCAGGAATTTTCATCAATCTTAGGAGCTATTAATTTTATTACAACCTATTATTAATATACGAATTAATCATATATCATT  
CGATCAAATACCTCTTTTGTATGAGCAGTAGGAATTACTGCTTTACTCTTATTATTATCATTTACCTGTATTAGCTGGTGCATTACTATATTATTA  
ACAGATCGAAATCTTAATACTTCATTTTTGTATCCAGCAGGGGTGGTATCCTATTTTATATCAA-----

EU836682\_h\_1\_32\_Rus  
-----  
GCTTTTCTCGAATAAATAATATAAGATTTTGATTACTACCCCTTCATTAACCTTTATTAATTTCTAGAAGAATTGTAGAAAATGGAGCAGGAACAG  
GATGAACAGTTTATCCCCCTTATCATCTAATATCGCTCATAGAGGTAGTTCAGTTGATTGATCTATTTTTCTTTACATTTAGCAGGAATTTTCATC  
AATCTTAGGAGCTATTAATTTTATTACAACCTATTATTAATATACGAATTAACCATATATCATTTGATCAAATACCTCTCTTTGTATGAGCAGTAGGA  
ATTACTGCTTTACTTTTATTATTATCTTTACCTGTATTAGCTGGTGCATTACTATATTATTAACAGATCGAAATCTTAATACTTCATTTTTGTATC  
CTGCAGGAGGTGGGATCCTATTTTATATCAACATTTA

EU836681\_h\_1\_31\_Rus  
-----  
GCTTTTCTCGAATAAATAATATAAGATTTTGATTACTACCCCTTCATTAACCTTTATTAATTTCTAGAAGAATTGTAGAAAATGGAGCAGGAACAG

[illegible]

GCTTTCCCTCGAATAAATAATATAAGATTTTGATTACTACCCCCCTCATTAACCTTTATTAATTTCTAGAGAATTGTAGAAAATGGAGCAGGAACAG  
GATGAACAGTTTATCCCCCTTTATCATCTAATATCGCTCATAGAGGTAGTTCAGTTGATTAGCTATTTTTCTTTACATTTAGCAGGAATTCATC  
AATCTTAGGGGCTATTAATTTTATTACAACATTATTATTAATATACGAATTAACCATATATCATTTGATCAAATACCTCTCTTTGTATGAGCAGTAGGA  
ATTACTGCTTTACTTTTATTATTATCTTTACCCGTATTAGCTGGTGCTATTACTATATTATTAACAGATCGAAATCTTAATACTTCATTTTTTGTATC  
CTGCAGGAGGTGGAGATCCTATTTTATATCAACATTTA

EU836666\_h\_1\_03\_Mac

GCTTTTCCTCGAATAAATAATATAAGATTTTGATTACTACCCCCCTCATTAACCTTTATTAATTTCTAGAGAATTGTAGAAAATGGAGCAGGAACAG  
GATGAACAGTTTATCCCCCTTTATCATCTAATATCGCTCATAGAGGTAGTTCAGTTGATTAGCTATTTTTCTTTACATTTAGCAGGAATTCATC  
AATCTTAGGGGCTATTAATTTTATTACAACATTATTATTAATATACGAATTAACCATATATCATTTGATCAAATACCTCTCTTTGTATGAGCAGTAGGA  
ATTACTGCTTTACTTTTATTATTATCTTTACCTGTATTAGCTGGTGCTATTACTATATTATTAACAGATCGAAATCTTAATACTTCATTTTTTGTATC  
CTGCAGGAGGTGGAGATCCTATTTTATATCAACATTTA

EU836665\_h\_1\_02\_Gre\_Mac

GCTTTTCCTCGAATAAATAATATAAGATTTTGATTACTACCCCCCTCATTAACCTTTATTAATTTCTAGAGAATTGTAGAAAATGGAGCAGGAACAG  
GATGAACAGTTTATCCCCCTTTATCATCTAATATCGCTCATAGAGGTAGTTCAGTTGATTAGCTATTTTTCTTTACATTTAGCAGGAATTCATC  
AATCTTAGGGGCTATTAATTTTATTACAACATTATTATTAATATACGAATTAACCATATATCATTTGATCAAATACCTCTCTTTGTATGAGCAGTAGGA  
ATTACTGCTTTACTTTTATTATTATCTTTACCTGTATTAGCTGGTGCTATTACTATATTATTAACAGATCGAAATCTTAATACTTCATTTTTTGTATC  
CTGCAGGAGGTGGAGATCCTATTTTATATCAACATTTA

EU836664\_h\_2\_06\_At\_It

GCTTTTCCTCGAATAAATAATATAAGATTTTGATTGCTACCCCCCTCATTAACCTTTATTAATTTCTAGAGAATTGTAGAAAATGGAGCAGGAACAG  
GATGAACAGTTTATCCCCCTTTATCATCTAATATCGCTCATAGAGGTAGTTCAGTTGATTAGCTATTTTTCTTTACATTTAGCAGGAATTCATC  
AATCTTAGGAGCTATTAATTTTATTACAACATTATTATTAATATACGAATTAACCATATATCATTTGATCAAATACCTCTCTTTGTATGAGCAGTAGGA  
ATTACTGCTTTACTTTTATTATTATCTTTACCTGTATTAGCTGGTGCTATTACTATATTATTAACAGATCGAAATCTTAATACTTCATTTTTTGTATC  
CTGCAGGAGGTGGAGATCCTATTTTATATCAACATTTA

EU836663\_h\_2\_05\_It

GCTTTCCCTCGAATAAATAATATAAGATTTTGATTGCTACCCCCCTCATTAACCTTTATTAATTTCTAGAGAATTGTAGAAAATGGAGCAGGAACAG  
GATGAACAGTTTATCCCCCTTTATCATCTAATATCGCTCATAGAGGTAGTTCAGTTGATTAGCTATTTTTCTTTACATTTAGCAGGAATTCATC  
AATCTTAGGAGCTATTAATTTTATTACAACATTATTATTAATATACGAATTAACCATATATCATTTGATCAAATACCTCTCTTTGTATGAGCAGTAGGA  
ATTACTGCTTTACTTTTATTATTATCTTTACCTGTATTAGCTGGTGCTATTACTATATTATTAACAGATCGAAATCTTAATACTTCATTTTTTGTATC  
CTGCAGGAGGTGGAGATCCTATTTTATATCAACATTTA;

END;

begin mrbayes;

```
set autoclose=yes nowarn=yes;
partition ancstates = 2: 1, 2-655;
set partition=ancstates;
lset applyto=(2) rates=invgamma nst=6;
unlink statefreq=(all) revmat=(all) shape=(all) pinvar=(all);
prset ratepr=variable;
constraint mnemosyne_clade2=LOWAM001_Kyrgyzstan_Alai_10 LOWAM004_Uzbekistan_Gissar_38
LOWAM007_Kyrgyzstan_TianShan24 LOWAM009_Kyrgyzstan_TianShan_6 LOWAM013_Turkey_Georgia_3
LOWAM014_Turkey_Ovitdagi_1 LOWAM015_Don_Borisovka_Saratov LOWAM018_Kyrgyzstan_Karamyk
LOWAM019_Kyrgyzstan_Karamyk LOWAM021_Russia_Saratov LOWAM023_Saratov_Luga_Vologda_4
LOWAM027_Kazakhstan_Karatau_2 LOWAM037_Russia_Pskovskaya LOWAM038_Kyrgyzstan_Tjuz_Ashu_3
LOWAM039_Kyrgyzstan_23 LOWAM044_Russia_Borisovra_3 LOWAM045_Tajikistan_Shakhristan_3
LOWAM067_Kazakhstan_Kaindy_1 LOWAM069_Russia_Teberda_2 LOWAM073_Kyrgyzstan_Takhtalyk1
LOWAM074_Kyrgyzstan_Naryntoo LOWAM086_Turkmenistan_3 LOWAM087_Uzbekistan_Sarchashma
LOWAM095_Kyrgyzstan_Sosnovka LOWAM096_Gissar_5 LOWAM098_Tajikistan_Khondizal
LOWAM099_Uzbekistan_Kamchik_2 LOWAM100_Kyrgyzstan_Konduk LOWAM115_Azerbaijan_Nyus_Nyus
LOWAM116_Iran_Dizin_2 LOWAM122_Russia_Saratow_1 LOWAM136_Uzbekistan_Tamshush_1
LOWAM149_Kyrgyzstan_Songkel_1 LOWAM198_Turkey_Aladaglar_2 LOWAM213_Tajikistan_Tandukul_1
Parnassius_stubbendorffii_2005_LOWA_815 Parnassius_stubbendorffii_2005_LOWA_154
Parnassius_stubbendorffii_2005_LOWA_153 Parnassius_ariadne_ariadne Parnassius_glacialis_mikado
Parnassius_stubbendorffii_hoenei Parnassius_stubbendorffii_hoenei_AC20_16
Parnassius_stubbendorffii_koreanus Parnassius_ariadne_AC4_14 HQ004911_RV_07_C107_Romania
HQ004908_RV_07_D060_Romania HQ004907_RV_08_M274_Romania HQ004902_RV_08_M361_Romania
GU947642_Pmne_ITNEB01_Italy_Sicily EU093018_Ca995 EU093017_Ch892 EU093016_Tk889 EU093015_It878
EU093014_Hu875 EU093013_Sk872_Cz_Slova EU093011_Cz869 EU093010_Ru_Bosnia_Fi_Bu_Hu_Bel_Po_Rom_Ukr_
EU093009_Kz848 EU093007_Fi810 EU093004_Tu999 EU093000_Bu961 EU092998_Bu951 EU092997_Ru940
EU092996_Sp924_Fr EU092995_Sp923 EU092994_Sp921 EU092993_Sp917 EU092992_Sp916 EU092991_Fr913
EU092990_Fr911 EU092988_It639 EU092987_Fr528 EU092985_Fr525 EU092984_Fr522 EU092983_Ch765
EU092982_Pl653_Slova_Ukr EU092981_At626 EU092980_At622 EU092978_At618_At_Slo
EU092977_At606_At_Cz_D_Fi_Hu_Po_Slova EU092976_At602 EU092975_D757 EU092974_D756 EU092973_D744
EU092971_Hu697_Bu_Hu EU092969_Bu775 EU092968_Bu772 EU093003_D982 DQ407769_UP_100_F
AM231426_W336_parvisi_Gre AM231425_W333_angorae_Tur AM231424_W331_angorae_Tur_Ankara
AM231423_W329_gigantea_Uzb_Chatkal AM231422_W330_orientalis_Zailiyskiy
AM231421_W292_ochracea_TadJ_Zeravsh AM231420_W280_farsica_Iran_Fars
AM231419_W311_pseudonubilosus_Iran_Urmia AM231418_W335_sheljuzhkoi_Tur_Adana
```

```

AM231417_W78_parmenides_Fr EU836682_h_1_32_Rus EU836681_h_1_31_Rus
EU836680_A_Bo_Bu_Cr_Cz_Hu_Sl_Li_Fi_Po_Ru EU836675_h_1_19_It EU836674_h_1_18_At_It
EU836672_h_1_10_It EU836671_h_1_09_It EU836670_h_1_07_Gre EU836669_h_1_06_Gre EU836668_h_1_05_Gre
EU836667_h_1_04_Gre EU836666_h_1_03_Mac EU836665_h_1_02_Gre_Mac EU836664_h_2_06_At_It
EU836663_h_2_05_It;
    prset topologypr=constraints(mnemosyne_clade2);
    report applyto=(1) ancstates=yes;
    mcmc ngen= 100000 relburnin=yes burninfrac=0.25 printfreq=100 samplefreq=100 nchains=4
savebrlens=yes;
    mcmc;
    sump;
end;

```

### Alignment and command block for reconstruction of the ancestral states in the clade (3) (*stubbendorffii*+*glacialis*+*hoenei*)

#NEXUS

```

BEGIN DATA;
    DIMENSIONS NTAX=125 NCHAR=655;
    format datatype=mixed(standard:1,DNA:2-655) interleave=yes gap=- missing=?;
    MATRIX
Parnassius_orleans_AC10_5 0
LOWAM001_Kyrgyzstan_Alai_10 1
LOWAM004_Uzbekistan_Gissar_38 1
LOWAM007_Kyrgyzstan_TianShan24 1
LOWAM009_Kyrgyzstan_TianShan_6 1
LOWAM013_Turkey_Georgia_3 1
LOWAM014_Turkey_Ovitdagi_1 1
LOWAM015_Don_Borisovka_Saratov 1
LOWAM018_Kyrgyzstan_Karamyk 1
LOWAM019_Kyrgyzstan_Karamyk 1
LOWAM021_Russia_Saratov 1
LOWAM023_Saratov_Luga_Vologda_4 1
LOWAM027_Kazakhstan_Karatau_2 1
LOWAM037_Russia_Pskovskaya 1
LOWAM038_Kyrgyzstan_Tjuz_Ashu_3 1
LOWAM039_Kyrgyzstan_23 1
LOWAM044_Russia_Borisovra_3 1
LOWAM045_Tajikistan_Shakhristan_3 1
LOWAM067_Kazakhstan_Kaindy_1 1
LOWAM069_Russia_Teberda_2 1
LOWAM073_Kyrgyzstan_Takhtalyk1 1
LOWAM074_Kyrgyzstan_Naryntoo 1
LOWAM086_Turkmenistan_3 1
LOWAM087_Uzbekistan_Sarchashma 1
LOWAM095_Kyrgyzstan_Sosnovka 1
LOWAM096_Gissar_5 1
LOWAM098_Tajikistan_Khondizal 1
LOWAM099_Uzbekistan_Kamchik_2 1
LOWAM100_Kyrgyzstan_Konduk 1
LOWAM115_Azerbaijan_Nyus_Nyus 1
LOWAM116_Iran_Dizin_2 1
LOWAM122_Russia_Saratow_1 1
LOWAM136_Uzbekistan_Tamshush_1 1
LOWAM149_Kyrgyzstan_Songkel_1 1
LOWAM198_Turkey_Aladaglar_2 1
LOWAM213_Tajikistan_Tandukul_1 1
Parnassius_clodius 0
Parnassius_eversmanni_2005_LOWA_108 0
Parnassius_eversmanni_2005_LOWA_107 0
Parnassius_stubbendorffii_2005_LOWA_815 1
Parnassius_stubbendorffii_2005_LOWA_154 1
Parnassius_stubbendorffii_2005_LOWA_153 1
Parnassius_nordmanni 0
Parnassius_eversmanni 0
Parnassius_eversmanni_felderi 0
Parnassius_ariadne_ariadne 0
Parnassius_glacialis_mikado 1
Parnassius_stubbendorffii_hoenei 1
Parnassius_stubbendorffii_hoenei_AC20_16 1
Parnassius_stubbendorffii_koreanus 1
Parnassius_nordmanni_AC20_5 0

```

|                                             |   |
|---------------------------------------------|---|
| Parnassius_eversmanni_felderi_AC23_68       | 0 |
| Parnassius_eversmanni_eversmanni_AC1_14     | 0 |
| Parnassius_clodius_AC4_5                    | 0 |
| Parnassius_ariadne_AC4_14                   | 0 |
| HQ004911_RV_07_C107_Romania                 | 1 |
| HQ004908_RV_07_D060_Romania                 | 1 |
| HQ004907_RV_08_M274_Romania                 | 1 |
| HQ004902_RV_08_M361_Romania                 | 1 |
| GU947642_Pmne_ITNEB01_Italy_Sicily          | 1 |
| EU093018_Ca995                              | 1 |
| EU093017_Ch892                              | 1 |
| EU093016_Tk889                              | 1 |
| EU093015_It878                              | 1 |
| EU093014_Hu875                              | 1 |
| EU093013_Sk872_Cz_Slova                     | 1 |
| EU093011_Cz869                              | 1 |
| EU093010_Ru_Bosnia_Fi_Bu_Hu_Bel_Po_Rom_Ukr_ | 1 |
| EU093009_Kz848                              | 1 |
| EU093007_Fi810                              | 1 |
| EU093004_Tu999                              | 1 |
| EU093000_Bu961                              | 1 |
| EU092998_Bu951                              | 1 |
| EU092997_Ru940                              | 1 |
| EU092996_Sp924_Fr                           | 1 |
| EU092995_Sp923                              | 1 |
| EU092994_Sp921                              | 1 |
| EU092993_Sp917                              | 1 |
| EU092992_Sp916                              | 1 |
| EU092991_Fr913                              | 1 |
| EU092990_Fr911                              | 1 |
| EU092988_It639                              | 1 |
| EU092987_Fr528                              | 1 |
| EU092985_Fr525                              | 1 |
| EU092984_Fr522                              | 1 |
| EU092983_Ch765                              | 1 |
| EU092982_Pl653_Slova_Ukr                    | 1 |
| EU092981_At626                              | 1 |
| EU092980_At622                              | 1 |
| EU092978_At618_At_Slo                       | 1 |
| EU092977_At606_At_Cz_D_Fi_Hu_Po_Slova       | 1 |
| EU092976_At602                              | 1 |
| EU092975_D757                               | 1 |
| EU092974_D756                               | 1 |
| EU092973_D744                               | 1 |
| EU092971_Hu697_Bu_Hu                        | 1 |
| EU092969_Bu775                              | 1 |
| EU092968_Bu772                              | 1 |
| EU093003_D982                               | 1 |
| DQ407769_UP_100_F                           | 1 |
| AM231426_W336_parvisi_Gre                   | 1 |
| AM231425_W333_angorae_Tur                   | 1 |
| AM231424_W331_angorae_Tur_Ankara            | 1 |
| AM231423_W329_gigantea_Uzb_Chatkal          | 1 |
| AM231422_W330_orientalis_Zailiyskiy         | 1 |
| AM231421_W292_ochracea_Tadj_Zeravsh         | 1 |
| AM231420_W280_farsica_Iran_Fars             | 1 |
| AM231419_W311_pseudonubilosus_Iran_Urmia    | 1 |
| AM231418_W335_sheljuzhkoi_Tur_Adana         | 1 |
| AM231417_W78_parmenides_Fr                  | 1 |
| EU836682_h_1_32_Rus                         | 1 |
| EU836681_h_1_31_Rus                         | 1 |
| EU836680_A_Bo_Bu_Cr_Cz_Hu_Sl_Li_Fi_Po_Ru    | 1 |
| EU836675_h_1_19_It                          | 1 |
| EU836674_h_1_18_At_It                       | 1 |
| EU836672_h_1_10_It                          | 1 |
| EU836671_h_1_09_It                          | 1 |
| EU836670_h_1_07_Gre                         | 1 |
| EU836669_h_1_06_Gre                         | 1 |
| EU836668_h_1_05_Gre                         | 1 |
| EU836667_h_1_04_Gre                         | 1 |
| EU836666_h_1_03_Mac                         | 1 |
| EU836665_h_1_02_Gre_Mac                     | 1 |
| EU836664_h_2_06_At_It                       | 1 |
| EU836663_h_2_05_It                          | 1 |

Parnassius\_orleans\_AC10\_5

-----  
TGAGCAGGTATAATAGGAACCTCTTTAAGATTATTAATTCGTACTGAATTAGGTAATCCTGGATCTTTAATTGGAGATGATCAAATTTATAACACTA  
TTGTAACAGCTCATGCTTTTATTATAATTTTTTTTATAGTTATACCAATTATAATTGGAGGATTTGGAAATTGATTAATTCATTAAATATTAGGAGC  
CCCAGATATAGCTTTCCCCCGAATAAATAATATAAGATTTTGACTATTACCCCCCTCATTAACTTATTAATTTCCAGAAGAATCGTAGAAAATGGA  
GCAGGAACCTGGATGAACAGTTTATCCCCCTTTATCCTCTAATATTGCCCATAGTGAAGATCAGTTGATTTAGCTATCTTTTCTTTACATTTAGCTG

GAATTCATCTATTTTAGGAGCTATTAATTTTATTACAATAATTATTAATATACGAATTAATCATATATCATTTGATCAAATACCCCTTTTCGTATG  
AGCAGTAGGAATTACTGCTTTACTTTTATTATTATCTTTACCTGTTTTAGCAGGTGCTATTACTATACCTTCTTACAGATCGAAATCTTAATACTTCA  
TTTTTTGATCCAGCAGGAGGTGGAGATCCTATTTTATACCAACATTTA

LOWAM001 Kyrgyzstan Alai 10

ACACATATATTTTATTTTGGTATTGAGCAGGTATAGTAGGAACCTCTTTAAGATTATTAATTCGTACTGAATTAGGTAATCCTGGATCTTTAATG  
GAGATGATCAAAATTTATAATAGAGTTCTGACACAGCTCATGCTCTTTATATAATTTTTCATAGTTATACCAATTAATTTGGAGAGTTGGAAAATTG  
ATAATTCCCTTTAATATAGGAGCCCATATAGCTTTTCTCGAATAAATAATAGAAGTTTGATTACCTACCCCTCTATTAACTTTTAAATT  
TCTAGAAGAATTGTAGAAAAATGGAGCAGGAACAGGATGAACAGTTTATCCCCCTTTATCATCTAATATCGCTCATAGAGGTAGTTCAGTTGATTAG  
CTATTTTTCTTTACATTTTGTAGCAGGAATCTCATCAATTTAGGAGCTATTAAATTATTACCAACTATTTAATATACGAATTAACCATATATCAT  
TGATCAAAATACCCCTCTTTGTATGAGCAGTAGGAATTTACTGCTTACTTTTATTTATTTATCTTTACCTGTATTAGCTGGTGCTATTACTATATTATTA  
ACAGATCGAAATCTTAATACTTCATTTTGTATCTGCAAGGAGGTGGAGATCCTATTTTATATCAACATTTA

LOWAM004\_Uzbekistan\_Gissar\_38

ACACATATATTTTATTTTGGTATTGAGCAGGTATAGTAGGAACCTCTTTAAGATTATTAATTCGTACTGAATTAGGTAATCCTGGATCTTTAATG  
GAGATGATCAAAATTTATAATAGATTGTGACAGCTCATGCTTTTATTAATTTTTCATAGTTATCAAAATTAATTTGGAGATTGGAAAATTG  
ATAATTCCTTTAATATAGAGGCCCATATAGCTTTTCTCGAATAAATAATTAAGATTTTGATTACCTACCCCTCTTAATCACTTTAATTT  
TCCAGAAGAATTGTAGAAAAATGGAGCAGGAACAGGATGAACAGTTTATCCCCCTTTATCATCTAATATCGCTCATAGAGGTAGTTCAGTTGATTAG  
CTATTTTTCTTTACATTTAGCAGGAAGTATCATCAATTTAGGAGCTATTATTTATTATTACCACTATTATTAATATACGAATTAACCATATATCAT  
TGATCAAAATACCCCTCTTTGTATGAGCAGTAGGAATTTACTGCTTTACTTTTATTTATCTTTACCTGTATTAGCTGGTGCTATTACTATATTATTA  
ACAGATCGAAATCTTAATACCTCATTTTTTGTAGCTCGCAGGAGGTGGAGATCCTATTTTATATCAACATTTA

LOWAM007 Kyrgyzstan TianShan24

ACACATATATTTTATTTTGGTATTGAGCAGGTATAGTAGGAACCTCTTAAAGATTATTAATTCGTACTGAATTAGGTAATCCTGGATCTTTAATG  
GAGATGATCAAAATTTATAATACCTTTGTAGACAGCTCATGCTCTTTATATAATTTTTTATAGTTATACCAATTAATTTGGAGGATTTGGAAATTTG  
ATAATTCCTTTTAATATAGGGGCCCATGATATAGCTTTTCTCGAAATAATAAGATTTTTGATTATACCCCTTACCTTAACCTTTTAAATTT  
TCTAGAAGAATTGTAGAAAAATGGAGCAGGAACAGGATGAACAGTTTATCCTCCCTTTATCATCTAATATCGCTCATAGAGGTAGTTCAGTTGATTTAG  
CTATTTTTCTTTACATTTTGTAGCAGGAATCTCATCAATCTTAGGAGCTATTAAATTTATTACAACTATTATTAAATACGAATTAATCATATATCATTT  
TGATCAAATACCTCTCTTTGTAGAGCAGTAGGAATCTGCTTCTATTTACTACTCTTTACCTGTATTAGCTGGTGCTATTACTATATTATTA  
ACAGATCGAAATCTTAATACCTCATTTTTGTAGTCTGCAGGAGGTGGAGATCCTATTTTATATCAACATTTA

LOWAM009\_Kyrgyzstan\_TianShan\_6

ACACATATATTTTATTTTGGTATTGAGCAGGTATAGTAGGAACCTCTTTAAGATTATTAATTCGTACTGAATTAGGTAATCCTGGATCTTTGATG  
GAGATGATCAAAATTTATAATCACTGTTAGACAGCTCATGCTCTTTTATATAATTTTTTATAGTTATACAAATTAATTTGGAGATTTGGAAATTTG  
ATAATTCCTTTAATATAGGGGCCCGCATATAGCTTTTCTCGAAATAATAATTAAGATTTTGATTATACCCCTCTTAACTTATTAATTT  
TCTAGAAGAATTGTAGAAAAATGGAGCAGGAACAGGATGAACAGTTTATCCTCCCTTTATCATCTAATATCGCTCATAGAGGTAGTTCAGTTGATTAG  
CTATTTTTTCTTTACATTTAGCAGGAATTCATCAATCTTAGGAGCTATTAATTTTTATTACAACATTTATTAATATACGAATTAATCATATATCATTT  
TGATCAAATACCTCTCTTTGTATGAGCAGTAGGAATCTGCTTCTATTATTACTATCTTTACCTGTATAGCTGGTGCTATTACTATATTATTA  
ACAGATCGAAATCTTAATACCTCATTTTTTGTAGCTGCAGGAGGTGGAGATCCTATTTTATATCAACATTTA

LOWAM013 Turkey Georgia 3

ACACATATATTTTATTTTTGGTATTTTAGCAGGTTATAGTAGGAACCTCTTTAAGATTATTAAATTCGTACTGAATTAGGTAATCCTGGATCTTTAATTG  
GAGATGATCAAAATTTATAATACTAGTATGAGCCAGCTCATGCTTTTATTATAAATTTTTTTATAGTTATAACCAATATAAATGGAGGATTTGGAAATTTG  
ATAAATTCCTTTAAATAGTAGGACCCGAGATATAGCTTTTCTCGAATAAATAATAGAAGTTTGGATTACTGCCCCCTCATTAATCACTTTTAAATTT  
TCTAGAAGAATTGTAGAAAAATGGAGCAGGAACAGGATGAACAGTTTATCCCCCTTTATCATCTAATATCGCTCATAGAGGTAGTTCAGTTGATTTAG  
CTATTTTTCTTTACATTTAGCAGGAAGTTATCATCAATCTTAGGAGCTATTAAATTTATTACAACATTAATTATAATACGAATTAACCATATATCATTT  
TGATCAAATACCTCTCTTTGTAGCAGCATAGGAATCTGCTTTACTTTATTATTATCTTTACCTGTATAGCTGGTGCTATTACTATATTATTA  
ACAGATCGAAATCTTAATACCTCATTTTTTGTAGCTCGCAGGAGGTGGAGATCCTATTTTATATCAACATTTA

LOWAM014\_Turkey\_Ovitdagi\_1

ACACATATATTTTTATTTTGGTATTTTAGCAGGTTAGTAGGAACCTCTTTAAGATTATTAATTCGTACTGAATTAGGTAATCCTGGATCTTTAATTG  
GAGATGATCAAATTTATAATAGTATTGTGAACAGCTCATGCTTTTATTAATAATTTTTTTATAGTTATACCAATATAATTTGGAGGATTTGGAAATTTG  
ATTAATTCCTTTAATAATAGTAGGCCCCAGATATAGCTTTCTCGAATAAATAATAGAAGTTTGATTATGCCCCCTCATTAACTTTATTAATT  
TCCAGAAGAATTGTAGAAAAATGGAGCAGGAACAGGATGAACAGTTTATCCCCCTTTATCATCTAATATCGCTCATAGAGGTAGTTCAGTTGATTAG  
CATTTTTCCTTTACATTTAGCAGGAAGTATCATCAATCTTAGGAGCTAATTAATTTATTACAACATTTAATTAATATACGAATTAACCATATATCAAT  
TGATCAAATACCTCTCTTTGTATGAGCAGTAGGAATCTGCTTTACTTTATTTATTTACTCTGTATAGCTGGTGCTATTACTATATTATTA  
ACAGATCGAAATCTTAATACCTTCATTTTGTAGCTCGCAGGAGGTGGAGATCCTATTTTATATCAACATTTA

LOWAM015\_Don\_Borisovka\_Saratov

ACACATATATTTTTATTTTGGTATTTTGAGCAGGATAGTAGGAACCTCTTTAAGATTATTAATTCTGTAAGTAATTAGGTAATCCTGGATCTTTAATTG  
GAGATGATCAAATTTATAATACTAGTTCTGTACACAGCTCATGCTCTTTATTAATAATTTTTTTATAGTTATAACCAATTATAATTGGAGGATTTGGAAATTTG  
ATAATTCTCTTTAAATATAGGACCCGATATAAGCTTTTCTCGAATAAATAATATAAGATTTTGATTACATACCCCTCATTAACCTTTTAAATTT  
TCTAGAAGAATTGTAGAAAAATGGAGCAGGAACAGGATGAACAGTTTATCCCCCTTTATCATCTAATATCGCTCATAGAGGTAGTTCAGTTGATTTAG  
CTATTTTTCTTTACATTTTAGCAGAAATTTTCATCAATCTTAGGAGCTATTAATTTTTATTACAACATTAATTAATATACGAATTAACCATATATCATTT  
TGATCAAATACCTCTCTTTGTAGCAGCAGTAGGAATCTGCTTTATCTTTATTTATTTATCTTTACCTGTATAGCTGGTGCTATTACTATATTATTA  
ACAGATCGAAATCTTAATACTTCATTTTTGTGATCTGACAGGAGGTGGGGATCCTATTTTATATCAACATTTA

LOWAM018\_Kyrgyzstan\_Karamyk

ACACATATATTTTATTTTGGTATTTGAGCAGGTATAGTAGGAACCTCTTTAAGATTATTAATTCGTACTGAATTAGGTAACTCTGGATCTTTAATTG  
GAGATGATCAAATTTATAATACTAGTTATGTAACAGCTCATGCTTTTATTAATAATTTTATATAGTTATACCAATTATAATTTGGAGGATTTGGAAATTTG  
ATTAATTCCTTTAATAATAGTAGGCCCAGATATAGCTTTCTCGAATAAATAATAGAAGTTTGATTACACCCCTTCATTAACTTATTAATTT  
TCTAGAAGAATTGTAGAAAAATGGAGCAGGAACAGGATGAACAGTTTATCCCCCTTTATCATCTAATATCGCTCATAGAGGTAGTTCAGTTGATTAG  
CTATTTTCTTTACATTTTAGCAGGAATTCATCAATTTTAGGAGCTAATTAATTCATTACAACATTTATTAATATACGAATTAAACCATATATCAAT  
TGATCAAATACCCCTCTTTGTATGAGCAGTAGGAATTACTGCTTACTTTATTTATTTATCTTTTACCTGTATAGCTGGTGCTATTACTATATTATTA  
ACAGATCGAAATCTTAATACCTTCATTTTGTGATCCAGCAGGAGGTGGAGATCCTATTTTATATCAACATTTA

LOWAM019\_Kyrgyzstan\_Karmyk

ACACATATATTTTTATTTTGGTATTTTGAGCAGGTATAGTAGGAACCTCTTTAAGATTATTAAATTCGTACTGAATTAGGTAATCCTGGATCTTTAAATTG  
GAGATGATCAAATTTATAACTACTATTGTAACAGCTCATGCTTTTATTATAAATTTTTTTCATAGTTTATAACCAATTAATCGGAGGATTTGGAAATTTG  
ATAAATCTCTTTAAATATAGAGGCCCCAGATATAGCTTTTCTCGAATAAATAAATAAGATTTTGATTACCTACCCCTTCAGTAACCTTTATTAAT





ATTAATTCCTTTAATATTAGGGGCCCCAGATATAGCTTTTCTCGAATAAATAATATAAGATTTTGATTATTACCCCTTCATTAACCTTTATTAATT  
TCTAGAATAATTGTAGAAAAATGGAGCAGGAACAGGATGAACAGTTTATCCCCCTTTATCATCTAAATATCGCTCATAGAGGTAGTTCAGTTGATTTAG  
CTATTTTTTCTTTACATTTAGCGGGAATTTTCATCAATCTTAGGAGCTATTAATTTTATTACAACCTATTATTAATATACGAATTAATCATATATCATT  
TGATCAAATACCTCTCTTTGTATGAGCAGTAGGAATTACTGCTTTACTTTTATTACTATCTTTACCTGTATTAGCTGGTGTATTACTATATTATTA  
ACAGATCGAAATCTTAATACTTCATTTTTTGATCTCGCAGGAGGTGGAGATCCTATTTTATATCAACATTTA

LOWAM069\_Russia\_Teberda\_2 -----  
TTTTTTTTTGGTATTTGAGCAGGTATAGTAGGAACCTCTTTAAGATTATTAATTCGTACTGAATTAGGTAATCCTGGATCTTTAATTGGAGATGATC  
AAATTTATAATACTATTGTAAACAGCTCATGCTTTTATTATAAATTTTTTTATAGTTATACCAATTATAAATTGGAGGATTTGGAAATTGATTAATTCC  
TTTAATATTAGGAGCCCCAGATATAGCTTTTCTCGAATAAATAATATAAGATTTTGTATTACTGCCCCCTCATTAACTTTTATTAATTTCTAGAAGA  
ATTGTAGAAAATGGAGCAGGAACAGGATGAACAGTTTATCCCCCTTTATCATCTAATATCGCTCATAGAGGTAGTTCAGTTGATTTAGCTATTTTTT  
CTTTACATTTAGCAGGAATTTTCATCAATCTTAGGAGCTATTAATTTTATTACAACCTATTATTAATATACGAATTAATCATATATCATTTGATCAAAT  
ACCTCTCTTTGTATGAGCAGTAGGAATTAC?GCTTTACTTTTATTATTATCTTTACCTGTATTAGCTGG?GCTATTACTATATTATTAACAGATCGA  
AATCT?AATACTTCATTTTTTGATCTCGCAGGAGGAGGAGATCCTATTTTATATCAACATTTA

LOWAM073\_Kyrgyzstan\_Takhtalyk1  
ACACTATATTTTATTTTGGTATTTGAGCAGGTATAGTAGGAACCTCTTTAAGATTATTAATTCGTACTGAATTAGGTAATCCTGGATCTTTAATTG  
GAGATGATCAAATTTATAATACTATTGTAAACAGCTCATGCTTTTATTATAAATTTTTTTATAGTTATACCAATTATAAATTGGAGGATTTGGAAATTG  
ATTAATTCCTTTAATATTAGGGGCCCCAGATATAGCTTTTCTCGAATAAATAATATAAGATTTTGTATTATTACCCCTTCATTAACCTTTATTAATT  
TCTAGAAGAAATTGTAGAAAAATGGAGCAGGAACAGGATGAACAGTTTATCCCCCTTTATCATCTAAATATCGCTCATAGAGGTAGTTCAGTTGATTTAG  
CTATTTTTTCTTTACATTTAGCGGGGATTTTCATCAATCTTAGGAGCTATTAATTTTATTACAACCTATTATTAATATACGAATTAATCATATATCATT  
TGATCAAATACCTCTCTTTGTATGAGCAGTAGGAATTACTGCTTTACTTTTATTATTATCTTTACCTGTATTAGCTGGTGTATTACTATATTATTA  
ACAGATCGAAATCTTAATACTTCATTTTTTGATCTCGCAGGAGGTGGAGATCCTATTTTATATCAACATTTA

LOWAM074\_Kyrgyzstan\_Naryntoo  
ACACTATATTTTATTTTGGTATTTGAGCAGGTATAGTAGGAACCTCTTTAAGATTATTAATTCGTACTGAATTAGGTAATCCTGGATCTTTAATTG  
GAGATGATCAAATTTATAATACTATTGTAAACAGCTCATGCTTTTATTATAAATTTTTTTTATAGTTATACCAATTATAAATTGGAGGATTTGGAAATTG  
ATTAATTCCTTTAATATTAGGGGCCCCAGATATAGCTTTTCTCGAATAAATAATATAAGATTTTGTATTATTACCCCTTCATTAACCTTTATTAATT  
TCTAGAAGAAATTGTAGAAAAATGGAGCAGGAACAGGATGAACAGTTTATCCCCCTTTATCATCTAAATATCGCTCATAGAGGTAGTTCAGTTGATTTAG  
CTATTTTTTCTTTACATTTAGCGGGAATTTTCATCAATCTTAGGAGCTATTAATTTTATTACAACCTATTATTAATATACGAATTAATCATATATCATT  
TGATCAAATACCTCTCTTTGTATGAGCAGTAGGAATTACTGCTTTACTTTTATTACTATCTTTACCTGTATTAGCTGGTGTATTACTATATTATTA  
ACAGATCGAAATCTTAATACTTCATTTTTTGATCTCGCAGGAGGTGGAGATCCTATTTTATATCAACATTTA

LOWAM086\_Turkmenistan\_3  
ACATTATATTTTATTTTGGTATTTGAGCAGGTATAGTAGGAACCTCTTTAAGATTATTAATTCGTACTGAATTAGGTAATCCTGGATCTTTAATTG  
GAGATGATCAAATTTATAATACTATTGTAAACAGCTCATGCTTTTATTATAAATTTTTTTTATAGTTATACCAATTATAAATTGGAGGATTTGGAAATTG  
ATTAATTCCTTTAATATTAGGAGCCCCAGATATAGCTTTCCCCCGAATAAATAATATAAGATTTTGTATTATTACCCCTTCATTAACCTTTATTAATT  
TCTAGAAGAAATTGTAGAAAAATGGAGCAGGAACCTGGATGAACAGTTTATCCCCCTTTATCATCTAATATGCCCATAGAGGTAGTTCAGTTGATTTAG  
CTATTTTTTCTTTACATTTAGCAGGAATTTTCATCAATTTTAGGAGCTATTAATTTTATTACAACCTATTATTAATATACGAATTAATCATATATCATT  
TGATCAAATACCTCTCTTTGTATGAGCAGTAGGAATTACTGCTTTACTTTTATTACTATCTTTACCTGTATTAGCTGGTGTATTACTATATTATTA  
ACAGATCGAAATCTTAATACTTCATTTTTTGATCTCGCAGGAGGTGGAGATCCTATTTTATATCAACATTTA

LOWAM087\_Uzbekistan\_Sarchashma  
ACACTATATTTTATTTTGGTATTTGAGCAGGTATAGTAGGAACCTCTTTAAGATTATTAATTCGTACTGAATTAGGTAATCCTGGATCTTTAATTG  
GAGATGATCAAATTTATAATACTATTGTAAACAGCTCATGCTTTTATTATAAATTTTTTTTATAGTTATACCAATTATAAATTGGAGGATTTGGAAATTG  
ATTAATTCCTTTAATATTAGGAGCCCCAGATATAGCTTTTCTCGAATAAATAATATAAGATTTTGTATTATTACCCCTTCATTAACCTTTATTAATT  
TCCAGAAGAAATTGTAGAAAAATGGAGCAGGAACAGGATGAACAGTTTATCCCCCTTTATCATCTAATATCGCTCATAGAGGTAGTTCAGTTGATTTAG  
CTATTTTTTCTTTACATTTAGCAGGAATTTTCATCAATTTTAGGAGCTATTAATTTTATTACAACCTATTATTAATATACGAATTAACCATATATCATT  
TGATCAAATACCTCTCTTTGTATGAGCAGTAGGAATTACTGCTTTACTTTTATTACTATCTTTACCTGTATTAGCTGGTGTATTACTATATTATTA  
ACAGATCGAAATCTTAATACTTCATTTTTTGATCTCGCAGGAGGTGGAGATCCTATTTTATATCAACATTTA

LOWAM095\_Kyrgyzstan\_Sosnovka  
ACACTATATTTTATTTTGGTATTTGAGCAGGTATAGTAGGAACCTCTTTAAGATTATTAATTCGTACTGAATTAGGTAATCCTGGATCTTTAATTG  
GAGATGATCAAATTTATAATACTATTGTAAACAGCTCATGCTTTTATTATAAATTTTTTTTATAGTTATACCAATTATAAATTGGAGGATTTGGAAATTG  
ATTAATTCCTTTAATATTAGGAGCCCCAGATATAGCTTTTCTCGAATAAATAATATAAGATTTTGTATTACTACCCCTTCATTAACCTTTATTAATT  
TCCAGAAGAAATTGTAGAAAAATGGAGCAGGAACAGGATGAACAGTTTATCCCCCTTTATCATCTAATATCGCTCATAGAGGTAGTTCAGTTGATTTAG  
CTATTTTTTCTTTACATTTAGCAGGAATTTTCATCAATTTTAGGAGCTATTAATTTTATTACAACCTATTATTAATATACGAATTAATCATATATCATT  
TGATCAAATACCTCTCTTTGTATGAGCAGTAGGAATTACTGCTTTACTTTTATTACTATCTTTACCTGTATTAGCTGGTGTATTACTATATTATTA  
ACAGATCGAAATCTTAATACTTCATTTTTTGATCTCGCAGGAGGTGGAGATCCTATTTA?ATCAACATTTA

LOWAM096\_Gissar\_5  
ACACTATATTTTATTTTGGTATTTGAGCAGGTATAGTAGGAACCTCTTTAAGATTATTAATTCGTACTGAATTAGGTAATCCTGGATCTTTAATTG  
GAGATGATCAAATTTATAATACTATTGTAAACAGCTCATGCTTTTATTATAAATTTTTTTTATAGTTATACCAATTATAAATTGGAGGATTTGGAAATTG  
ATTAATTCCTTTAATATTAGGAGCCCCAGATATAGCTTTTCTCGAATAAATAATATAAGATTTTGTATTACTACCCCTTCATTAACCTTTATTAATT  
TCCAGAAGAAATTGTAGAAAAATGGAGCAGGAACAGGATGAACAGTTTATCCCCCTTTATCGTCTAATATCGCTCATAGAGGTAGTTCAGTTGATTTAG  
CTATTTTTTCTTTACATTTAGCAGGAATTTTCATCAATTTTAGGAGCTATTAATTTTATTACAACCTATTATTAATATACGAATTAACCATATATCATT  
TGATCAAATACCTCTCTTTGTATGAGCAGTAGGAATTACTGCTTTACTTTTATTACTATCTTTACCTGTATTAGCTGGTGTATTACTATATTATTA  
ACAGATCGAAATCTTAATACTTCATTTTTTGATCTCGCAGGAGGTGGAGATCCTATTTTATATCAACATTTA

LOWAM098\_Tajikistan\_Khondizal  
ACACTATATTTTATTTTGGTATTTGAGCAGGTATAATAGGAACCTCTTTAAGATTATTAATTCGTACTGAATTAGGTAATCCTGGATCTTTAATTG  
GAGATGATCAAATTTATAATACTATTGTAAACAGCTCATGCTTTTATTATAAATTTTTTTTATAGTTATACCAATTATAAATTGGAGGATTTGGAAATTG  
ATTAATTCCTTTAATATTAGGAGCCCCAGATATAGCTTTTCTCGAATAAATAATATAAGATTTTGTATTACTACCCCTTCATTAACCTTTATTAATT  
TCCAGAAGAAATTGTAGAAAAATGGAGCAGGAACAGGATGAACAGTTTATCCCCCTTTATCGTCTAATATCGCTCATAGAGGTAGTTCAGTTGATTTAG  
CTATTTTTTCTTTACATTTAGCAGGAATTTTCATCAATTTTAGGAGCTATTAATTTTATTACAACCTATTATTAATATACGAATTAACCATATATCATT  
TGATCAAATACCTCTCTTTGTATGAGCAGTAGGAATTACTGCTTTACTTTTATTATTATCTTTACCTGTATTAGCTGGTGTATTACTATATTATTA  
ACAGATCGAAATCTTAATACTTCATTTTTTGATCTCGCAGGAGGTGGAGATCCTATTTTATATCAACATTTA

LOWAM099\_Uzbekistan\_Kamchik\_2  
ACACTATATTTTATTTTGGTATTTGAGCAGGTATAGTAGGAACCTCTTTAAGATTATTAATTCGTACTGAATTAGGTAATCCTGGATCTTTAATTG

ACACATATATTTTATTTTGGTATTTTGAGCAGGTATAGTAGGAACCTCTTTAAGATTATTAATTGCGTAGAATTAGGTAATCCTGGATCTTTAATTG  
GAGATGATCAAAATTTATAATACATTGTTGAACAGCTCATGCTTTTATTATAAATTTTTTCATAGTTATACCAAACTATAAATGGAGGAGTTTGGAAATTG  
ATTAATTCCTTTAATATTAGGAGCCCCAGATATAGCTTTTCTCGAATAAAATATAAGATTTTGATTACTACCCCTCATTTAACTTTATTAATTT  
CTAGAAGAAATGTAGAAAATGGAGCAGGAACAGGATGAACAGTTTATCCCCCTTTATTTATCTAATATCGCTCATAGAGGTAGTTTCAGTTGATTTAG  
CTATTTTTTCTTTACATTTAGCAGGAATTTTCATCAATTTTAGGAGCTATTAATTTCAATACAACATTATTATAATATACGAATTAACCATATATCATT  
TGATCAAAATCCCCCTCTTTGATAGCAGTAGGAATTAATCGGTCATCTTTATTTATTAATCTTTACCTGTTATAGCTGGTGCTATTACTATATTATTA  
ACAGATCGAAATCTTAAATCTTCATTTTGTAGTCTCGCAGGAGGTGGAGATCTATTTTATATCAACATTTTA

Parnassius\_clodius  
ACATTATATTTTATTTTGGTATTTGAGCAGGTATAGTAGGAACCTCTTTAAGATTATTAATTCGTACTGAATTAGGTAATCCTGGATCTTTAATTG  
GAGATGATCAAATTTATAATACTATTGTAACAGCTCATGCTTTTATCATAATTTTTTTTCATAGTTATACCAATTATAAATTGGAGGATTTGGAAATTG  
ATTAATTCATTAAATATTAGGAGCTCCAGATATAGCTTTTCTCGAATAAAATAATATAAGATTTTGATTATTACCCCTTCATTAACCTTTATTAATT  
TCTAGAAGAATTGTACAAAATGGAGCAGGAACCTGGATGAACAGTTTATCCCCCTTTATCATCTAATATTGCTCATAGAGGAAGATCAGTTGATTTAG  
CTATTTTTCTTTTATTTAGCTGGAATTTTCATCTATCTTAGGAGCTTTTATTAAGATTTGCTCATAGAGGAAGATCAGTTGATTAGCTATCTTTCTTTACATTTAG  
TGATCAAATACCCCTTTTGTATGAGCAGTAGGAATTACCGCTTTACTTCTATTATTATCTTTACCTGTTTTAGCAGGTGCTATTACCATATTATTA  
ACAGATCGAAATCTTAATACTTCATTTTTTGTATCCAGCAGGAGGTGGAGATCCTATTTTATATCAACACTTA

Parnassius\_eversmanni\_2005\_LOWA\_108 -----  
ATTTGAGCAGGTATAGTAGGAACCTCTTTAAGATTATTAATTCGTTCTGAATTAGGTAATCCTGGATCTTTAATTGGAGATGATCAAATTTATAATA  
CTATTGTAACAGCTCATGCTTTTATATAATTTTTTTTATAGTTATACCAATTATAAATTGGAGGATTTGGAAATTGATTAATTCATTAAATATTAGG  
AGCTCCAGATATAGCTTTTCTCGAATAAAATAATATAAGATTTTGATTATTACCCCTTCATTAACCTTACTAATTTCTAGAAGAATTGTAGAAAAT  
GGAGCAGGAACCTGGATGAACGGTTTATCCCCCTTTATCATCTAAGATTTGCTCATAGAGGAAGATCAGTTGATTAGCTATCTTTCTTTACATTTAG  
CTGGAATTTTCATCTATCTTAGGAGCTATTAATTTTATTACAACCTATTATTAATATACGAATTAATCATATATCATTTGATCAAATACCCCTTTTGT  
ATGAGCAGTAGGAATTACTGCTTTACTTTTATTATTATCTTTACCTGTTTTAGCAGGTGCTATTACCATATTATTAACAGATCGAAATCTTAATACT  
TCATTTTTTGACCCAGCAGGAGGTGGAGATCCTATTTTATATCAACACTTA

Parnassius\_eversmanni\_2005\_LOWA\_107 -----  
ATTTGAGCAGGTATAGTAGGAACCTCTTTAAGATTATTAATTCGTTCTGAATTAGGTAATCCTGGATCTTTAATTGGAGATGATCAAATTTATAATA  
CTATTGTAACAGCTCATGCTTTTATTATAATTTTTTTTATAGTTATACCAATTATAAATTGGAGGATTTGGAAATTGATTAATTCATTAAATATTAGG  
AGCTCCAGATATAGCTTTTCTCGAATAAAATAATATAAGATTTTGATTATTACCCCTTCATTAACCTTACTAATTTCTAGAAGAATTGTAGAAAAT  
GGAGCAGGAACCTGGATGAACGGTTTATCCCCCTTTATCATCTAATATTGCTCATAGAGGAAGATCAGTTGATTAGCTATCTTTCTTTACATTTAG  
CTGGAATTTTCATCTATCTTAGGAGCTATTAATTTTATTACAACCTATTATTAATATACGAATTAATCATATATCATTTGATCAAATACCCCTTTTGT  
ATGAGCAGTAGGAATTACTGCTTTACTTTTATTATTATCTTTACCTGTTTTAGCAGGTGCTATTACCATATTATTAACAGATCGAAATCTTAATACT  
TCATTTTTTGACCCAGCAGGAGGTGGAGATCCTATTTTATATCAACACTTA

Parnassius\_stubbendorfii\_2005\_LOWA\_815  
ACATTATATTTTATTTTGGTATTTGAGCAGGTATAGTAGGAACCTCTTTAAGATTATTAATTCGTACTGAATTAGGTAATCCTGGATCTTTAATTG  
GAGATGATCAAATTTATAATACTATTGTAACAGCTCATGCTTTTATTATAATTTTTTTTATAGTTATACCAATTATAAATTGGAGGATTTGGAAATTG  
ATTAATTCCTTTAATATTAGGAGCCCCAGATATAGCTTTTCTCGAATAAAATAATATAAGATTTTGATTATTACCCCTTCATTAACCTTTACTAATT  
TCCAGAAGAATTGTAGAAAATGGGCAGGAACCTGGATGAACAGTCTACCCTCCTTTATCATCTAATATTGCTCACGGAGGAAGATCTGTTGATTTAG  
CTATTTTTCTTTACATTTAGCGGGAATTTTCATCTATTTTAGGAGCCATTAATTTTATTACAACCTATTATTAATATACGAATTAATCATATATCATT  
TGATCAAATACCTCTTTTGTATGAGCAGTAGGAATTACTGCTTTACTTTTATTATTATCTCTACCTGTTTTAGCAGGTGCTATTACTATATTATTA  
ACAGATCGAAATCTTAATACTTCATTTTTTGACCCAGCAGGAGGTGGAGATCCTATTTTATATCAACACTTA

Parnassius\_stubbendorfii\_2005\_LOWA\_154  
ACATTATATTTTATTTTGGTATTTGAGCAGGTATAGTAGGAACCTCTTTAAGATTATTAATTCGTACTGAATTAGGTAATCCTGGATCTTTAATTG  
GAGATGATCAAATTTATAATACTATTGTAACAGCTCATGCTTTTATTATAATTTTTTTTATAGTTATACCAATTATAAATTGGAGGATTTGGAAATTG  
ATTAATTCCTTTAATATTAGGAGCCCCAGATATAGCTTTTCTCGAATAAAATAATATAAGATTTTGATTATTACCCCTTCATTAACCTTTACTAATT  
TCCAGAAGAATTGTAGAAAATGGAGCAGGAACCTGGATGAACAGTCTACCCTCCTTTATCATCTAATATTGCTCACGGAGGAAGATCTGTTGATTTAG  
CTATTTTTCTTTACATTTAGCGGGAATTTTCATCTATTTTAGGAGCCATTAATTTTATTACAACCTATTATTAATATACGAATTAATCATATATCATT  
TGATCAAATACCTCTTTTGTATGAGCAGTAGGAATTACTGCTTTACTTTTATTATTATCTCTACCTGTTTTAGCAGGTGCTATTACTATATTATTA  
ACAGATCGAAATCTTAATACTTCATTTTTTGACCCAGCAGGAGGTGGAGATCCTATTTTATATCAACACTTA

Parnassius\_stubbendorfii\_2005\_LOWA\_153 -  
CATTATATTTTATTTTGGTATTTGAGCAGGTATAGTAGGAACCTCTTTAAGATTATTAATTCGTACTGAATTAGGTAATCCTGGATCTTTAATTGG  
AGATGATCAAATTTATAATACTATTGTAACAGCTCATGCTTTTATTATAATTTTTTTTATAGTTATACCAATTATAAATTGGAGGATTTGGAAATTGA  
TTAATTCCTTTAATATTAGGAGCCCCAGATATAGCTTTTCTCGAATAAAATAATATAAGATTTTGATTATTACCCCTTCATTAACCTTTACTAATTT  
CCAGAAGAATTGTAGAAAATGGAGCAGGAACCTGGATGAACAGTCTACCCTCCTTTATCATCTAATATTGCTCACGGAGGAAGATCTGTTGATTTAGC  
TATTTTTCTTTTACATTTAGCGGGAATTTTCATCTATTTTAGGAGCCATTAATTTTATTACAACCTATTATTAATATACGAATTAATCATATATCATT  
GATCAAATACCTCTTTTGTATGAGCAGTAGGAATTACTGCTTTACTTTTATTATTATCTCTACCTGTTTTAGCAGGTGCTATTACTATATTATTAA  
CAGATCGAAATCTTAATACTTCATTTTTTGACCCAGCAGGAGGTGGAGATCCTATTTTATATCAACACTTA

Parnassius\_nordmanni  
ACATTATATTTTATTTTGGTATTTGAGCAGGTATAGTAGGAACCTCTTTAAGATTATTAATTCGTACTGAATTAGGTAATCCTGGATCTCTAATTG  
GAGATGATCAAATTTACAATACTATCGTAACAGCTCATGCTTTTATTATAATTTTTTTTATAGTTATACCAATTATAAATTGGAGGATTTGGAAATTG  
ATTAATTCATTAAATATTAGGAGCTCCAGATATAGCTTTTCCCGAATAAAATAATATAAGATTTTGATTATTACCCCTTCATTAACCTTACTAATT  
TCTAGAAGAATTGTAGAAAATGGAGCAGGAACCTGGATGAACGGTTTATCCCCCTTTATCATCTAATATTGCTCACGGAGGAAGATCAGTTGATTTAG  
CTATTTTTCTTTTACATTTGGCTGGGATTTCTTCTATTTTAGGAGCTATTAATTTTATCACAACCTATTGTTAATATACGAATTAATCATATATCATT  
TGATCAAATACCTCTTTTCGTATGAGCAGTAGGAATTACTGCTTTACTTTTATTATTATCTCTACCTGTTTTAGCAGGTGCTATTACTATATTATTA  
ACAGATCGAAATCTTAATACTTCATTTTTTGTATCCAGCAGGAGGTGGAGATCCTATTTTATATCAACACTTA

Parnassius\_eversmanni  
ACATTATATTTTATTTTGGTATTTGAGCAGGTATAGTAGGAACCTCTTTAAGATTATTAATTCGTTCTGAATTAGGTAATCCTGGATCTTTAATTG  
GAGATGATCAAATTTATAATACTATTGTAACAGCTCATGCTTTTATTATAATTTTTTTTATAGTTATACCAATTATAAATTGGAGGATTTGGAAATTG  
ATTAATTCATTAAATATTAGGAGCTCCAGATATAGCTTTTCTCGAATAAAATAATATAAGATTTTGATTATTACCCCTTCATTAACCTTACTAATT  
TCTAGAAGAATTGTAGAAAATGGAGCAGGAACCTGGATGAACGGTTTATCCCCCTTTATCATCTAATATTGCTCATAGAGGAAGATCAGTTGATTTAG  
CTATCTTTTCTTTACATTTAGCTGGAATTTTCATCTATCTTAGGAGCTATTAATTTTATTACAACCTATTATTAATATACGAATTAATCATATATCATT  
TGATCAAATACCCCTTTTGTATGAGCAGTAGGAATTACTGCTTTACTTTTATTATTATCTTTACCTGTTTTAGCAGGTGCTATTACCATATTATTA  
ACAGATCGAAATCTTAATACTTCATTTTTTGTATCCAGCAGGAGGTGGAGATCCTATTTTATATCAA-----

Parnassius\_eversmanni\_felderi  
ACATTATATTTTATTTTGGTATTTGAGCAGGTATAGTAGGAACCTCTTTAAGATTATTAATTCGTTCTGAATTAGGTAATCCTGGATCTTTAATTG  
GAGATGATCAAATTTATAATACTATTGTAACAGCTCATGCTTTTATTATAATTTTTTTTATAGTTATACCAATTATAAATTGGAGGATTTGGAAATTG  
ATTAATTCATTAAATATTAGGAGCTCCAGATATAGCTTTTCTCGAATAAAATAATATAAGATTTTGATTATTACCCCTTCATTAACCTTACTAATT  
TCTAGAAGAATTGTAGAAAATGGAGCAGGAACCTGGATGAACGGTTTATCCCCCTTTATCATCTAATATTGCTCATAGAGGAAGATCAGTTGATTTAG  
CTATCTTTTCTTTTACA?TTAGCTGGAATTTTCATCTATCTTAGGAGCTATTAATTTTATTACAACCTATTATTAATATACGAATTAATCATATATCATT  
TGATCAAATACCCCTTTTGTATGAGCAGTAGGAATTACTGCTTTACTTTTATTATTATCTTTACCTGTTTTAGCAGGTGCTATTACCATATTATTA  
ACAGATCGAAATCTTAATACTTCATTTTTTGTATCCAGCAGGAGGTGGAGATCCTATTTTATATCAA-----

Parnassius\_ariadne\_ariadne  
ACATTATATTTTATTTTGGTATTTGAGCAGGTATAGTAGGAACCTCTTTAAGATTATTAATTCGTACTGAATTAGGTAATCCTGGATCTTTAATTG  
GAGATGATCAAATTTATAAATACTATCGTAACAGCTCATGCTTTTATTATAATTTTTTTTATAGTTATACCAATTATAAATTGGAGGATTTGGAAATTG  
ATTAATTCCTTTAATATTAGGAGCTCCAGATATAGCCTTTCTCGAATAAATAATATAAGATTTTGATTACTACCCCTCATTAACCTTTATTAATC  
TCTAGAAGAAATTGTAGAAAATGGAGCAGGAACGGATGAACAGTTTATCCCCCTTATCATCTAAATTGCTCATAGAGGAATTCAGTTGATTTAG  
CCATTTCTCTTTACATTTAGCAGGAATTTTCATCAATTTTAGGAGCTATTAATTTTATCACAACTATTATTAATATACGAATTAATCATATATCATT  
TGATCAAATACCCCTTTTGTGAGCAGTAGGAATTACTGCTTTACTATTATTATATCTTTACCTGTATTAGCTGGTGTATTACTATATTATTA  
ACAGATCGAAATCTTAATACTTCATTTTTTGATCCAGCAGGA????GAGATCCTATTTTATATCAA-----

Parnassius\_glacialis\_mikado  
ACATTATATTTTATTTTGGTATTTGAGCAGGTATAGTAGGAACCTCCTTAAGATTATTAATTCGTACTGAATTAGGTAATCCTGGATCTTTAATTG  
GAGATGATCAAATTTATAAATACTATTGTAACAGCTCATGCTTTTATTATAATTTTTTTTATAGTTATACCAATTATAAATTGGAGGATTTGGAAATTG  
ATTAATCCCTTTAATATTAGGAGCTCCAGATATAGCTTTCCCGGAATAAATAATATAAGATTTTGATTATTACCCCTCATTAACCTTTACTAATT  
TCCAGAAGAAATTGTAGAAAATGGAGCAGGAACAGGATGAACAGTTTATCCCCATTATCCTCTAATATTGCCACAGAGGAAGATCTGTTGATTTAG  
CTATTTTTCTTTACATTTAGCAGGAATTTTCATCTATTCTAGGAGCTATTAATTTTATTACAACCTATTATTAATATACGAATTAATCATATATCATT  
TGATCAAATACCTCTCTTTGTTGAGCAGTAGGAATTACTGCTTTACTTTTATTATTATCCTTACCTGTTTTAGCAGGTGCTATTACTATATTATTA  
ACAGATCGAAATCTTAATACTTCCTTTTTTGACCCAGCAGGAGGTGGAGATCCAAATTTTATATCAA-----

Parnassius\_stubbendorffii\_hoenei  
ACATTATATTTTATTTTGGTATTTGAGCAGGAATAGTAGGAACCTCCCTAAGATTATTAATTCGTACTGAATTAGGTAATCCCGGATCTTTAATTG  
GAGATGATCAAATTTATAAATACTATTGTAACAGCTCATGCTTTTCATTATAATTTTTTTTATAGTTATACCAATTATAAATTGGAGGATTTGGAAATTG  
ACTGATTCCTTTAATATTAGGAGCCCCAGATATAGCTTTCCCGGAATAAATAATATAAGATTTTGATTACTACCCCTCATTAACCTTTATTAATT  
TCTAGAAGAAATTGTAGAAAATGGAGCAGGAACGGATGAACAGTCTATCCCCCTTATCATCTAATATTGCCATAGAGGAAGATCCGTTGATTTAG  
CTATTTTTCTTTACATTTAGCAGGAATTTTCATCTATTTTAGGAGCCATTAATTTTATTACAACCTATTATTAATATACGAATTAATCATATATCATT  
TGATCAAATACCTCTCTTTGTTGAGCAGTAGGAATTACTGCTTTACTTTTATTATTATCCTTTACCTGTTTTAGCAGGTGCTATTACTATATTATTA  
ACAGATCGAAATCTTAATACTTCCTTTTTTGACCCAGCAGGAGGTGGAGATCCTATTTTATACCAA-----

Parnassius\_stubbendorffii\_hoenei\_AC20\_16 -----  
TGAGCAGGAATAGTAGGAACCTCCCTAAGATTATTAATTCGTACTGAATTAGGTAATCCCGGATCTTTAATTGGAGATGATCAAATTTACAATACTA  
TTGTAACAGCTCATGCTTTTATTATAATTTTTTTTATAGTTATACCAATTATAAATTGGAGGATTTGGAAATTGAGTATTCTTTAATATTAGGAGC  
CCCAGATATAGCTTTCCCGGAATAAATAATATAAGATTTTGATTACTACCCCTCATTAACCTTTATTAATTTCTAGAAGAATTGTAGAAAATGGA  
GCAGGAACGGATGAACAGTCTATCCCTTTTATCATCTAATATTGCCATAGAGGAAGATCCGTTGATTAGCTATTTTTCTTTACATTTAGCAG  
GAATTTTCATCTATTTTAGGAGCCATTAATTTTATTACAACCTATTATTAATATACGAATTAATCATATATCATTGATCAAATACCTCTTTTGTATG  
AGCAGTAGGAATTACTGCTTTACTTTTATTATTATCTTTACCTGTTTTAGCAGGTGCTATTACTATATTATTAACAGATCGAAATCTTAATACTTCC  
TTTTTTGACCCGAGGAGGTGGAGATCCTATTTTATACCAACATTTA

Parnassius\_stubbendorffii\_koreanus -----  
TGAGCAGGTATAGTAGGAACCTCTTTAAGATTATTAATTCGTACTGAATTAGGTAATCCTGGATCTTTAATTGGAGATGATCAAATTTATAATACTA  
TTGTAACAGCTCATGCTTTTATTATAATTTTTTTTATAGTTATACCAATTATAAATTGGAGGATTTGGAAATTGATTAAATTCCTTTAATATTAGGAGC  
CCCAGATATAGCTTTTCTCGAATAAATAATATAAGATTTTGACTATTACCCCTCATTAACCTTTACTAATTTCCAGAAGAATTGTAGAAAATGGA  
GCAGGAACGGATGAACAGTCTACCTCCTTTATCATCTAATATTGCTCAGGAGGAAGATCTGTTGATTAGCTATTTTTCTTTACATTTAGCAG  
GAATTTTCATCTATTTTAGGAGCCATTAATTTTATTACAACCTATTATTAATATACGAATTAATCATATATCATTGATCAAATACCTCTTTTGTATG  
AGCAGTAGGAATTACTGCTTTACTTTTATTATTATCTCTACCTGTTTTAGCAGGTGCTATTACTATATTATTAACAGATCGAAATCTTAATACTTCA  
TTTTTTGACCCAGCAGGAGGTGGAGATCCTATTTTATATCAACATTTA

Parnassius\_nordmanni\_AC20\_5 -----  
TGAGCAGGTATAGTAGGAACCTCTTTAAGATTATTAATTCGTACTGAATTAGGTAATCCTGGATCTCTAATTGGAGATGATCAAATTTACAATACTA  
TCGTAACAGCTCATGCTTTTATTATAATTTTTTTTATAGTTATACCAATTATAAATTGGAGGATTTGGAAATTGATTAAATCCATTAAATATTAGGAGC  
TCCAGATATAGCTTTCCCGGAATAAATAATATAAGATTTTGATTATTACCCCTCATTAACCTCTATTAATTTCTAGAAGAATTGTAGAAAATGGG  
GCAGGAACGGATGAACAGTCTACCCCTTTTATCATCTAATATTGCTCATAGAGGAAGATCAGTTGACTTTGCTTTTCTTTACATTTGGCTG  
GGATTTCTTCTATTTTAGGAGCTATTAATTTTATCACAACTATTGTTAATATACGAATTAACATATATCATTGATCAAATACCTCTTTTGTATG  
AGCAGTAGGAATTACTGCTTTACTTTTATTATTATCTTTACCTGTTTTAGCAGGTGCTATTACTATATTATTAACAGATCGAAATCTTAATACTTCA  
TTTTTTGATCCAGCAGGAGGTGGAGACCTATTCTATATCAACATTTA

Parnassius\_eversmanni\_felderi\_AC23\_68 -----  
TGAGCAGGTATAGTAGGAACCTCTTTAAGATTATTAATTCGTCTGAATTAGGTAATCCTGGATCTTTAATTGGAGATGATCAAATTTATAATACTA  
TTGTAACAGCTCATGCTTTTATTATAATTTTTTTTATAGTTATACCAATTATAAATTGGAGGATTTGGAAATTGATTAAATCCATTAAATATTAGGAGC  
TCCAGATATAGCTTTTCTCGAATAAATAATATAAGATTTTGATTATTACCCCTCATTAACCTTACTAATTTCTAGAAGAATTGTAGAAAATGGA  
GCAGGAACGGATGAACGGTTTATCCCTTTTATCATCTAATATTGCTCATAGAGGAAGATCAGTTGATTAGCTATCTTTTCTTTACATTTAGCTG  
GAATTTTCATCTATCTTAGGAGCTATTAATTTTATTACAACCTATTATTAATATACGAATTAATCATATATCATTGATCAAATACCCCTTTTGTATG  
AGCAGTAGGAATTACTGCTTTACTTTTATTATTATCTTTACCTGTTTTAGCAGGTGCTATTACCATATTATTAACAGATCGAAATCTTAATACTTCA  
TTTTTTGACCCAGCAGGAGGTGGAGATCCTATTTTATTTCAACATTTA

Parnassius\_eversmanni\_eversmanni\_AC1\_14 -----  
TGATCAGGTATAGTAGGAACCTCTTTAAGATTATTAATTCGTCTGAATTAGGTAATCCTGGATCTTTAATTGGAGATGATCAAATTTATAATACTA  
TTGTAACAGCTCATGCTTTTATTATAATTTTTTTTATAGTTATACCAATTATAAATTGGAGGATTTGGAAATTGATTAAATCCATTAAATATTAGGAGC  
TCCAGATATAGCTTTTCTCGAATAAATAATATAAGATTTTGATTATTACCCCTCATTAACCTTACTAATTTCTAGAAGAATTGTAGAAAATGGA  
GCAGGAACGGATGAACGGTTTATCCCTTTTATCATCTAATATTGCTCATAGAGGAAGATCAGTTGATTAGCTATCTTTTCTTTACATTTAGCTG  
GAATTTTCATCTATCTTAGGAGCTATTAATTTTATTACAACCTATTATTAATATACGAATTAATCATATATCATTGATCAAATACCCCTTTTGTATG  
AGCAGTAGGAATTACTGCTTTACTTTTATTATTATCTTTACCTGTTTTAGCAGGTGCTATTACCATATTATTAACAGATCGAAATCTTAATACTTCA  
TTTTTTGACCCAGCAGGAGGTGGAGATCCTATTTTATTTCAACATTTA

Parnassius\_clodius\_AC4\_5 -----  
TGAGCAGGAATATTAGGAACCTCTTTAAGATTATTAATTCGTACTGAATTAGGTAATCCTGGATCTTTAATTGGAGATGATCAAATTTATAATACTA  
TTGTAACAGCTCATGCTTTTATCATAATTTTTTTTATAGTTATACCAATTATAAATTGGAGGATTTGGAAATTGATTAAATCCATTAAATATTAGGAGC  
TCCAGATATAGCTTTTCTCGAATAAATAATATAAGATTTTGATTATTACCCCTCATTAACCTTACTAATTTCTAGAAGAATTGTAGAAAATGGA  
GCAGGAACGGATGAACAGTCTATCCCTTTTATCATCTAATATTGCTCATAGAGGAAGATCAGTTGATTAGCTATTTTTCTTTACATTTAGCTG  
GAATTTTCATCTATCTTAGGAGCTATTAATTTTATTACAACCTATTATTAATATACGAATTAATCATATATCATTGATCAAATACCCCTTTTGTATG  
TTTTTTGACCCAGCAGGAGGTGGAGATCCTATTTTATATCAACATTTA

AGCAGTAGGAATTACCGCTTTACTTCTATTATTATCTTTACCTGTTTTAGCAGGTGCTATTACCATATTATTAACAGATCGAAATCTTAATACTTCA  
TTTTTTTGATCCAGCAGGAGGTGGAGATCCTATTTTATATCAACACTTA

Parnassius\_ariadne\_AC4\_14 -----  
TGAGCAGGTATAGTAGGAACCTCTTTAAGATTATTAATTCGTACTGAATTAGGTAATCCTGGATCTTTAATTGGAGATGATCAAATTTATAATACTA  
TCGTAAACAGCTCATGCTTTTATTAATAATTTTATAGTTATACCAATTTAATTTGGAGGATTTGGAAATTGATTAAATTCCTTTAATATTAGGAGC  
TCCAGATATAGCCTTTCTCGAATAAATAATAAAGATTTTGATTACTACCCCCCTCATTAACCTTTATTAATCTCTAGAGAATTGTAGAAAATGGA  
GCAGGAACCTGGATGAACAGTTTATCCCCCTTTATCATCTAATATTGCTCATAGAGGAAGTTCAGTTGATTAGCCATTTTCTCTTTACATTTAGCAG  
GAATTTATCAATTTTAGGAGCTATTAATTTTATCACAACATTATTAATATACGAATTAATCATATATCATTTGATCAAATACCCCTTTTTGTTTTG  
AGCAGTAGGAATTACGTCTTTACTATTATTATCTTTACCTGTATTAGCTGGTGCTATTACTATATCATTAAACAGATCGAAATCTTAATACTTCA  
TTTTTTTGATCCAGCAGGAGGTGGAGATCCTATTTTATATCAACACTTA

HQ004911\_RV\_07\_C107\_Romania  
ACACTATATTTTATTTTGGTATTTGAGCAGGTATAGTAGGAACCTCTTTAAGATTATTAATTCGTACTGAATTAGGTAATCCTGGATCTTTAATTG  
GAGATGATCAAATTTATAATACTATTGTAACAGCTCATGCTTTTATTATAATTTTATAGTTATACCAATTATAAATTGGAGGATTTGGAAATTG  
ATTAATTCCTTTAATATTAGGAGCCCCAGATATAGCTTTTCTCGAATAAATAATATAAGATTTTGATTACTACCCCTCATTAACCTTTATTAATT  
TCTAGAAGAATTGTAGAAAATGGAGCAGGAACAGGATGAACAGTTTATCCCCCTTTATCATCTAATATCGCTCATAGAGGTAGTTCAGTTGATTTAG  
CTATTTTTCTTTACATTTAGCAGGAATTTTATCAATCTTAGGAGCTATTAATTTTATTACAACATTATTAATATACGAATTAACCATATATCATT  
TGATCAAATACCTCTCTTTGTATGAGCAGTAGGAATTACTGCTTTACTTTTATTATTATCTTTACCTGTATTAGCTGGTGCTATTACTATATTATTA  
ACAGATCGAAATCTTAATACTTTCATTTTTTGATCTCGCAGGAGGTGGAGATCCTATTTTATATCAACATTTA

HQ004908\_RV\_07\_D060\_Romania  
ACACTATATTTTATTTTGGTATTTGAGCAGGTATAGTAGGAACCTCTTTAAGATTATTAATTCGTACTGAATTAGGTAATCCTGGATCTTTAATTG  
GAGATGATCAAATTTATAATACTATTGTAACAGCTCATGCTTTTATTATAATTTTATAGTTATACCAATTATAAATTGGAGGATTTGGAAATTG  
ATTAATTCCTTTAATATTAGGAGCCCCAGATATAGCTTTTCTCGAATAAATAATATAAGATTTTGATTACTACCCCTCATTAACCTTTATTAATT  
TCTAGAAGAATTGTAGAAAATGGAGCAGGAACAGGATGAACAGTTTATCCCCCTTTATCATCTAATATCGCTCATAGAGGTAGTTCAGTTGATTTAG  
CTATTTTTCTTTACATTTAGCAGGAATTTTATCAATCTTAGGAGCTATTAATTTTATTACAACATTATTAATATACGAATTAACCATATATCATT  
TGATCAAATACCTCTCTTTGTATGAGCAGTAGGAATTACTGCTTTACTTTTATTATTATCTTTACCTGTATTAGCTGGTGCTATTACTATATTATTA  
ACAGATCGAAATCTTAATACTTTCATTTTTTGATCTCGCAGGAGGTGGAGATCCTATTTTATATCAACATTTA

HQ004907\_RV\_08\_M274\_Romania  
ACACTATATTTTATTTTGGTATTTGAGCAGGTATAGTAGGAACCTCTTTAAGATTATTAATTCGTACTGAATTAGGTAATCCTGGATCTTTAATTG  
GAGATGATCAAATTTATAATACTATTGTAACAGCTCATGCTTTTATTATAATTTTATAGTTATACCAATTATAAATTGGAGGATTTGGAAATTG  
ATTAATTCCTTTAATATTAGGAGCCCCAGATATAGCTTTTCTCGAATAAATAATATAAGATTTTGATTACTACCCCTCATTAACCTTTATTAATT  
TCTAGAAGAATTGTAGAAAATGGAGCAGGAACAGGATGAACAGTTTATCCCCCTTTATCATCTAATATCGCTCATAGAGGTAGTTCAGTTGATTTAG  
CTATTTTTCTTTACATTTAGCAGGAATTTTATCAATCTTAGGAGCTATTAATTTTATTACAACATTATTAATATACGAATTAACCATATATCATT  
TGATCAAATACCTCTATTTGTATGAGCAGTAGGAATTACTGCTTTACTTTTATTATTATCTTTACCTGTATTAGCTGGTGCTATTACTATATTATTA  
ACAGATCGAAATCTTAATACTTTCATTTTTTGATCTCGCAGGAGGTGGAGATCCTATTTTATATCAACATTTA

HQ004902\_RV\_08\_M361\_Romania  
ACACTATATTTTATTTTGGTATTTGAGCAGGTATAGTAGGAACCTCTTTAAGATTATTAATTCGTACTGAATTAGGTAATCCTGGATCTTTAATTG  
GAGATGATCAAATTTATAATACTATTGTAACAGCTCATGCTTTTATTATAATTTTATAGTTATACCAATTATAAATTGGAGGATTTGGAAATTG  
ATTAATTCCTTTAATATTAGGAGCCCCAGATATAGCTTTTCTCGAATAAATAATATAAGATTTTGATTACTACCCCTCATTAACCTTTATTAATT  
TCTAGAAGAATTGTAGAAAATGGAGCAGGAACAGGATGAACAGTTTATCCCCCTTTATCATCTAATATCGCTCATAGAGGTAGTTCAGTTGATTTAG  
CTATTTTTCTTTACATTTAGCAGGAATTTTATCAATCTTAGGAGCTATTAATTTTATTACAACATTATTAATATACGAATTAACCATATATCATT  
TGATCAAATACCTCTCTTTGTATGAGCAGTAGGAATTACTGCTTTACTTTTATTATTATCTTTACCTGTATTAGCTGGTGCTATTACTATATTATTA  
ACAGATCGAAATCTTAATACTTTCATTTTTTGATCTCGCAGGAGGTGGAGATCCTATTTTATATCAACATTTA

GU947642\_Pmne\_ITNEB01\_Italy\_Sicily -----  
-----  
-----  
-----  
CCCCCTCATTAACCTTTATTAATTTCTAGAAGAATTGTAGAAAATGGAGCAGGAACCTGGATGAACAGTTTACCCCTTTATCATCTAATATTGCTCA  
TAGAGGAAGTTTCAGTTGATTTAGCTATTTTCTTACATTTAGCGGGAATTTTATCAATCTTAGGAGCTATTAATTTTATTACAACATTATTAAT  
ATACGAATTAATCATATCATTCGATCAAATACCTCTTTTGTATGAGCAGTAGGAATTAATTTTATTACAACATTATTAATTAATTAATTAATTA  
CTGGTGCTATTACTATATTATTAACAGATCGAAATCTTAATACTTTCATTTTTTGATCCCGCAGGAGGTGGTGATCCTATTTTATACCAACATTTA

EU093018\_Ca995 -----  
-----  
-----  
TTTTAATATTAGGAGCCCCAGATATAGCTTTTCTCGAATAAATAATATAAGATTTTGATTACTGCCCCCTCATTAACCTTTATTAATTTCTAGAAGA  
ATTGTAGAAAATGGAGCAGGAACAGGATGAACAGTTTATCCCCCTTTATCATCTAATATCGCTCATAGAGGTAGTTCAGTTGATTTAGCTATTTTTT  
CTTTACATTTAGCAGGAATTTTATCAATCTTAGGAGCTATTAATTTTATTACAACATTATTAATTAATTAATTAATTAATTAATTAATTAATTAAT  
ACCTCTCTTTGTATGAGCAGTAGGAATTACTGCTTTACTTTTATTATTATCTTTACCTGTATTAGCTGGTGCTATTACTATATTATTAACAGATCGA  
AATCTTAATACTTTCATTTTTTGATCTCGCAGGAGGTGGAGATCCTATTTTATATCAACATTTA

EU093017\_Ch892 -----  
-----  
-----  
TTTTAATATTAGGAGCCCCAGATATAGCTTTCCCCCGAATAAATAATATAAGATTTTGATTACTACCCCTTCATTAACCTTTATTAATTTCTAGAAGA  
ATTGTAGAAAATGGAGCAGGAACAGGATGAACAGTTTATCCCCCTTTATCATCTAATATTGCTCATAGAGGAAGTTCAGTTGATTTAGCTATTTTTT  
CCCTACATTTAGCGGGAATTTTATCAATCTTAGGAGCTATTAATTTTATTACAACATTATTAATTAATTAATTAATTAATTAATTAATTAATTAAT  
ACCTCTTTTGTATGAGCAGTAGGAATTACTGCTTTACTTTTATTATTATCTTTACCTGTATTAGCTGGTGCTATTACTATATTATTAACAGATCGA  
AATCTTAATACTTTCATTTTTTGATCCAGCAGGAGGTGGTGATCCTATTTTATATCAACATTTA

EU093016\_Tk889 -----  
-----  
-----  
TTTTAATATTAGGAGCCCCAGATATAGCTTTTCTCGAATAAATAATATAAGATTTTGATTACTACCCCTTCATTAACCTTTATTAATTTCTAGAAGA  
ATTGTAGAAAATGGAGCAGGAACAGGATGAACAGTTTATCCCCCTTTATCATCTAATATTGCTCATAGAATTAGTTCAGTTGATTTAGCTATTTTTT

CTTTACATTTAGCAGGAATTTTCATCAATCTTAGGAGCTATTAATTTTATTACAACCTATTATTAATATACGAATTAATCATTTATCATTTTGATCAAAT  
ACCCCTCTTTGTATGAGCAGTAGGAATTACTGCTTTACTTTTATTATTATCTTTACCTGTATTAGCTGGTGCTATTACTATATTATTAACAGATCGA  
AATCTTAATACTTCATTTTTTTGATCCTGCAGGAGGTGGAGATCCTATTTTATATCAACATTTA

EU093015\_It878 -----  
-----  
TTTAATATTAGGAGCCCCAGATATAGCTTTTCCCCGAATAAATAATATAAGATTTTGATTACTACCCCTTCATTAACCTTTATTAATTTCTAGAAGA  
ATTGTAGAAAATGGAGCAGGAACCTGGATGAACAGTTTATCCCCCTTTATCATCTAATATTGCTCATAGAGGAAGTTCAGTTGATTTAGCTATTTTTT  
CCTTACATTTAGCGGAATTTTCATCAATCTTAGGAGCTATTAATTTTATTACAACCTATTATTAATATACGAATTAATCATATATCATTCGATCAAAT  
ACCTCTCTTTGTATGAGCAGTAGGAATTACTGCTTTACTTTTATTATTATCTTTACCTGTATTAGCTGGTGCTATTACTATATTATTAACAGATCGA  
AATCTTAATACTTCATTTTTTTGATCCTGCAGGAGGTGGAGATCCTATTTTATATCAACATTTA

EU093014\_Hu875 -----  
-----  
TTTAATATTAGGAGCCCCAGATATAGCTTTTCTCGAATAAATAATATAAGATTTTGATTACTACCCCTTCATTAACCTTTATTAATTTCTAGAAGA  
ATTGTAGAAAATGGAGCAGGAACAGGATGAACAGTTTATCCCCCTTTATCATCTAATATCGCTCATAGAGGTAGTTTCAAGTTGATTTAGCTATTTTTT  
CTTTACATTTAGCGGAATTTTCATCAATCTTAGGAGCTATTAATTTTATTACAACCTATTATTAATATACGAATTAACCATATATCATTTGATCAAAT  
ACCTCTCTTTGTATGAGCAGTAGGAATTACTGCTTTACTTTTATTATTATCTTTACCTGTATTAGCTGGTGCTATTACTATATTATTAACAGATCGA  
AATCTTAATACTTCATTTTTTTGATCCTGCAGGAGGTGGAGATCCTATTTTATATCAACATTTA

EU093013\_Sk872\_Cz\_Slova -----  
-----  
TTTAATATTAGGAGCCCCAGATATAGCTTTTCTCGAATAAATAATATAAGATTTTGATTACTACCCCTTCATTAACCTTTATTAATTTCTAGAAGA  
ATTGTAGAAAATGGAGCAGGAACAGGATGAACAGTTTATCCCCCTTTATCATCTAATATCGCTCATAGAGGTAGTTTCAAGTTGATTTAGCTATTTTTT  
CTTTACATTTGGCAGGAATTTTCATCAATCTTAGGAGCTATTAATTTTATTACAACCTATTATTAATATACGAATTAATCATATATCATTTGATCAAAT  
ACCTCTCTTTGTATGAGCAGTAGGAATTACTGCTTTACTTTTATTATTATCTTTACCTGTATTAGCTGGTGCTATTACTATATTATTAACAGATCGA  
AATCTTAATACTTCATTTTTTTGATCCTGCAGGAGGTGGAGATCCTATTTTATATCAACATTTA

EU093011\_Cz869 -----  
-----  
TTTAATATTAGGAGCCCCAGATATAGCTTTTCTCGAATAAATAATATAAGATTTTGATTACTACCCCTTCATTAACCTTTATTAATTTCTAGAAGA  
ATTGTAGAAAATGGAGCAGGAACAGGATGAACAGTTTATCCCCCTTTATCATCTAATATTGCTCATAGAGGTAGTTTCAAGTTGATTTAGCTATTTTTT  
CTTTACATTTAGCAGGAATTTTCATCAATCTTAGGAGCTATTAATTTTATTACAACCTATTATTAATATACGAATTAACCATATATCATTTGATCAAAT  
ACCTCTCTTTGTATGAGCAGTAGGAATTACTGCTTTACTTTTATTATTATCTTTACCTGTATTAGCTGGTGCTATTACTATATTATTAACAGATCGA  
AATCTTAATACTTCATTTTTTTGATCCTGCAGGAGGTGGAGATCCTATTTTATATCAACATTTA

EU093010\_Ru\_Bosnia\_Fi\_Bu\_Hu\_Bel\_Po\_Rom\_Ukr -----  
-----  
TTTAATATTAGGAGCCCCAGATATAGCTTTTCTCGAATAAATAATATAAGATTTTGATTACTACCCCTTCATTAACCTTTATTAATTTCTAGAAGA  
ATTGTAGAAAATGGAGCAGGAACAGGATGAACAGTTTATCCCCCTTTATCATCTAATATCGCTCATAGAGGTAGTTTCAAGTTGATTTAGCTATTTTTT  
CTTTACATTTAGCAGGAATTTTCATCAATCTTAGGAGCTATTAATTTTATTACAACCTATTATTAATATACGAATTAACCATATATCATTTGATCAAAT  
ACCTCTCTTTGTATGAGCAGTAGGAATTACTGCTTTACTTTTATTATTATCTTTACCTGTATTAGCTGGTGCTATTACTATATTATTAACAGATCGA  
AATCTTAATACTTCATTTTTTTGATCCTGCAGGAGGTGGAGATCCTATTTTATATCAACATTTA

EU093009\_Kz848 -----  
-----  
TTTAATATTAGGGGCCCCAGATATAGCTTTTCTCGAATAAATAATATAAGATTTTGATTATTACCCCTTCATTAACCTTTATTAATTTCTAGAAGA  
ATTGTAGAAAATGGAGCAGGAACAGGATGAACAGTTTATCCCCCTTTATCATCTAATATCGCTCATAGAGGTAGTTTCAAGTTGATTTAGCTATTTTTT  
CTTTACATTTAGCAGGAATTTTCATCAATCTTAGGAGCTATTAATTTTATTACAACCTATTATTAATATACGAATTAACCATATATCATTTGATCAAAT  
ACCTCTCTTTGTATGAGCAGTAGGAATTACTGCTTTACTTTTATTACTATCTTTACCTGTATTAGCTGGTGCTATTACTATATTATTAACAGATCGA  
AATCTTAATACTTCATTTTTTTGATCCTGCAGGAGGTGGAGATCCTATTTTATATCAACATTTA

EU093007\_Fi810 -----  
-----  
TTTAATATTAGGAGCCCCAGATATAGCCTTTCTCGAATAAATAATATAAGATTTTGATTACTACCCCTTCATTAACCTTTATTAATTTCTAGAAGA  
ATTGTAGAAAATGGAGCAGGAACAGGATGAACAGTTTATCCCCCTTTATCATCTAATATCGCTCATAGAGGTAGTTTCAAGTTGATTTAGCTATTTTTT  
CTTTACATTTAGCAGGAATTTTCATCAATCTTAGGAGCTATTAATTTTATTACAACCTATTATTAATATACGAATTAACCATATATCATTTGATCAAAT  
ACCTCTCTTTGTATGAGCAGTAGGAATTACTGCTTTACTTTTATTATTATCTTTACCTGTATTAGCTGGTGCTATTACTATATTATTAACAGATCGA  
AATCTTAATACTTCATTTTTTTGATCCTGCAGGAGGTGGAGATCCTATTTTATATCAACATTTA

EU093004\_Tu999 -----  
-----  
TTTAATATTAGGAGCTCCAGATATAGCTTTTCTCGAATAAATAACATAAGATTTTGATTACTCCCCCTTCATTAACCTTTATTAATTTCTAGAAGA  
ATTGTAGAAAATGGAGCAGGAACAGGATGAACAGTTTATCCCCCTTTATCATCTAATATTGCTCATAGAGGTAGTTTCAAGTTGATTTAGCTATTTTTT  
CTTTACATTTAGCAGGAATTTTCATCAATCTTAGGAGCTATTAATTTTATTACAACCTATTATTAATATACGAATTAATAATATATCATTTGATCAAAT  
ACCTCTCTTTGTATGAGCAGTAGGAATTACTGCATTACTTTTATTATTATCTTTACCTGTATTAGCTGGTGCTATTACTATATTATTAACAGATCGA  
AATCTTAATACTTCATTTTTTTGATCCCGCAGGAGGTGGAGATCCTATTTTATATCAACATTTA

EU093000\_Bu961 -----  
-----  
TTTAATATTAGGAGCCCCAGATATAGCTTTTCTCGAATAAATAATATAAGATTTTGATTACTACCCCTTCATTAACCTTTATTAATTTCTAGAAGA

EU092998\_Bu951

-----

TTTAATATTAGGAGCCCCAGATATAGCTTTTCTCGAATAAATAATATAAGATTTTGATTACTACCCCCCTCATTAACTTTATTAATTTCTAGAAGA  
ATTGTAGAAAATGGAGCAGGAACAGGATGAACAGTTTATCCCCCTTTATCATCTAATATCGCTCATAGTGGTAGTTTCAGTTGATTTAGCTATTTTTT  
CTTTACTTTTAGCAGGAATTCATCAATCTTAGGAGCTATTAAATTTTATTACAACATCTATTATTAATATACGAATTAACCATATATCATTTGATCAAAT  
ACCTCTCTTTGTATGAGCAGTAGGAATTACTGCTTTACTTTTATTATTATTTTACCTGTTATTAAGCTGGTGCTATTACTATATTATTAACAGATCGA  
AATCTTAATACTTCATTTTTTGATCCTGCAGGAGGTGGAGATCCTATTTTATCATCAACATTTA

EU092997\_Ru940

-----

-----

TTTAATATTAGGAGCCCCAGATATAGCTTTTTCCTCGAATAAATAATATAAGATTTTGATTACTACCCCCCTCATTAACCTTTATTAATTTCTAGAAGA  
ATTGTAGAAAATGGAGCAGGAACAGGATGAACAGTTTATCCCCCTTTATCATCTAATATCGCTCATAGAGGTAGTTTCAGTTGATTTAGCTATTTTTTT  
CTTTACCTTTAGCAGGAATTTTCATCAATCTTAGGAGCTATTAAATTTTATTACAACATCTATTATTAATATACGAATTAACCATATATCATTTGATCAAAT  
ACCTCTCTTTGTATGAGCAGTAGGAATTACTGCTTACTTTTATTATTATCTCTACCTGTTATTAGCTGGTGCTATTACTATATTATTAACAGATCGA  
AATCTTAATACTTCATCTTTGATCCTGCGAGGAGTGGGGATCCTATTTTATATCAACATTTA

EU092996\_Sp924\_Fr

-----

TTTAATATTAGGAGCCCCAGATATAGCTTTCCCCGAATAAATAATATAAGATTTTGATTACTACCCCTTCATTAACCTTATTAATTTCTAGAAGA  
ATTGTAGAAAATGGAGCAGGAACCTGGATGAACAGTTTACCCCTTTATCATCCAATATTGCTCATAGAGGAAGTTCAGTTGATTAGCTATTTTTT  
CCCTACATTTTAGCAGGAATTCATCAATCTTAGGAGCTATTAAATTTATTACAACATTATTAATATACGAATTAATCATATATCATTCGATCAAA  
ACCTCTTTTGTGTGAGCAGTAGGAATTACTGCTTTACTTTTATTATTATCTTTACCTGTATTAGCTGGTGTCTATTACTATATTATTAACAGATCGA  
AATCTTAATACTTCACTTCTTTGATCCAGCAGGAGGTGGTGATCCTATTTTATTAACAACATTTA

EU092995\_Sp923

-----

TTTAATATTAGGAGCCCCAGATATAGCTTTCCCCGAATAAATAATATAAGATTTTGATTACTACCCCTTCATTAACCTTATTAATTTCTAGAAGA  
ATTGTAGAAAATGGAGCAGGAACCTGGATGAACAGTTTATCCCCCTTTATCATCCAATATTGCTCATAGAGGAAGTTCAGTTGATTAGCTATTTTTT  
CCCTACATTTAGCGGAATTTTCATCAATCTTAGGAGCTATTAAATTTTATTACAACCTGTTATTAATATACGAATTAATCATATATCATTCGATCAAA  
ACCTCTTTTGTGTGAGCAGTAGGAATTAAGTCTTACTTTTATTTATTTATCTTACCTGATTATAGCTGGTGCTATTACTATATTTATTAACGGATCGA  
AATCTTAATACTTCACTTTTGTATGATCCAGCAGGAGGTGGTGATCCTATTTTATATCAACATTTA

EU092994\_Sp921

-----

-----

TTTAATATTAGGAGCCCCAGATATAGCTTTCCCCGAATAAATAATATAAGATTTTGATTACTACCCCTTCATTAACCTTATTAATTTCTAGAAGA  
ATTGTAGAAAATGGAGCAGGAACCTGGATGAACAGTTTACCCCCCTTTATCATCCAATATTGCTCATAGAGGAAGTTCAGTTGATTTAGCTATTTTTT  
CCCTACCTTTAGCAGGAATTTTCATCAATCTTAGGAGCTATTAAATTTTATTACAACCTATTATTAATATACGAATTAATCATATATCATTCGATCAAA  
ACCTCTTTTGTGTGAGCATTAGGAATTAAGTCTTTACTTTTATTATTATCTTTATACCTGATTAGCTGGTGCTATTACTATATTTATTAACGGATCGA  
AATCTTAATACTTCACTTTTGTATCCAGCAGGAGGTGGTGATCTCTTTTATTTATCAACATTTA

EU092993\_Sp917

-----

TTTAATATTAGGAGCCCCAGATATAGCTTTCCCCGAATAAATAATATAAGATTTTGATTACTACCCCTTCATTAACCTTATTAATTTCTAGAAGA  
ATTGTAGAAAATGGAGCAGGAACCTGGATGAACAGTTTATCCCCCTTTATCATCCAATATTGCTCATAGAGGAAGTTCAGTTGATTTAGCTATTTTTT  
CCCTACCTTTTAGCAGGAATTTTCATCAATCTTAGGAGCTATTAAATTTTATTACAACATTATTAAATATACGAATTAATCATATATCATTCGATCAAAT  
ACCTCATTTTTGTGTGAGCAGTAGGAATTAAGTCTTTTACTGCTTTTATTTATTTATCTTTACCTGTATTAGCTGGTGCTATTACTATATTTATTAACAGATCGA  
AATCTTAATACTTCACTTTTGTATCCAGCAGGAGGTGGTGATCTCTATTTTATTAACAACATTTA

EU092992\_Sp916

-----

-----

TTTAATATTAGGAGCCCCAGATATAGCTTTCCCCGAATAAATAATATAAGATTTTGATTACTACCCCTTCATTAACCTTATTAATTTCTAGAAGA  
ATTGTAGAAAATGGAGCAGGAACCTGGATGAACAGTTTACCCCCCTTTATCATCCAATATTGCTCATAGAGGAAGTTCAGTTGATTAGCTATTTTTT  
CCCTACATTTAGCAGTAATTTTCATCAATCTTAGGAGCTATTAAATTTTATTACAACATTATTAAATATACGAATTAATCATATATCATTCGATCAAAT  
ACCTCTTTTGTGTGAGCAGTAGGAATTAAGTCTTTACTTTTATTATTATCTTTACCTGTATGATCTGGTGCTATTACTATATTATTAACAGATCGA  
AATATTAAATCTCATTTTTTGTATCCAGCAGGAGGTGGTGATCTCTTTTATTTATCAACATTTA

EU092991\_Fr913

-----

-----

TTTAATATTAGGAGCCCCAGATATAGCTTTCCCCGAATAAATAATATAAGATTTTGATTACTACCCCTTCATTAACCTTATTAATTTCTAGAAGA  
ATTGTAGAAAATGGAGCAGGAACCTGGATGAACAATTTACCCCCCTTTATCATCCAATATTGCTCATAGAGGAAGTTCAGTTGATTTAGCTATTTTTT  
CCCTACCTTTAGCAGGAATTTCAATCTTAGGAGCTATTAAATTTTATTACAACATTATTAAATATACGAATTAATCATATATCATTCGATCAAAT  
ACCTCTTTTTGTGTGAGCAGTAGGAATTAAGTCTTTACTTTTATTATTATCTTTACCTGTATTAGCTGGTGCTATTACTATATTTATTAACAGATCGA  
AATCTTAATACTTCACTTCTTTGATCTCAGCAGGAGGTGGTGATCTCTATTTTATTAATCAACATTTA

EU092990\_Fr911

EU092988 It639

EU092987 Fr528

EU092985 Fr525

EU092984 Fr522

EU092983 Ch765

EU092982 Pl653 Slova Ukr

EU092981 At626

EU092980 At622

EU092978 At618 At Slo





TTTAAATATTAGGAGCCCCAGATATAGCTTTTCCTCGAATAAATAATATAAGATTTTGATTACTACCCCCCTCATTAACCTTTATTAATTTCTAGAAGA  
ATTGTAGAAAAATGGAGCAGGAACAGGATGAACAGTTTATCCCCCTTTATCATCTAATATTGCTCATAGAGGTAGTTTCAGTTGATTAGCTATTTTTT  
CTTTACATTTTAGCAGGAATTTTCATCAATCTTAGGAGCTATTATTAATTTATCACTAATATTATTAATATACGAATTAACCATATATCATTTTGATCAAAT  
ACCTCTCTTTGTATGGGCAGTAGGAATTACTGCTTTACTTTTATTATTATCTTTACCTGTATTAGCTGGTGCATTACTATATTATTAACAGATCGA  
AATCTTAATACTTTCATTTTTTTGATCCTGCAGGAGGTGGAGATCCTATTTTATATCAACATTTA

## DQ407769\_UP\_100\_F

ACATTATATTTTATTTTGGTATTTGAGCAGGTATAGTAGGAACCTCTTTAAGATTATTAATTCGTACTGAATTAGGTAATCCTGGATCTTTAATTG  
GAGATGATCAAATTTATAAATACTATTGTAACAGCTCATGCTTTTATTATAATTTTTTTTATAGTTATACCAATTATAAATTGGAGGATTGGAAATTG  
ATTAATTCCTTTAATATTAGGAGCCCCAGATATAGCTTTCCCCGAATAAATAATATAAGATTTTGATTACTACCCCCCTTCATTAACCTTATTAATT  
TCTAGAAGAATTGTGAGAAATGGAGCAGGAACAGGATGAACAGTTTACCCCCCTTTATCATCTAATATTGCTCATAGAGGAAGTTTCAGTTGATTAG  
CTATTTTTTTCCTTACATTTAGCAGGAATTTTCATCAATCTTAGGAGCTATTAATTTTATTACAACCTATTATTAATATACGAATTAATCATATATCATT  
CGATCAAATACCTCTTTTTGTATGAGCAGTAGGAATTACTGCTTTACTCTTATTATTATCATTACCTGTATTAGCTGGTGCATTACTATATTATTA  
ACAGATCGAAATCTTAATACTTTCATTTTTTTGATCCAGCAGGGGTGGTGA-----

## AM231426\_W336\_parvisi\_Gre

ACACTATATTTTATTTTGGTATTTGAGCAGGTATAGTAGGAACCTCTTTAAGATTATTAATTCGTACTGAATTAGGTAATCCTGGATCTTTAATTG  
GAGATGATCAAATTTATAAATACTATTGTAACAGCTCATGCTTTTATTATAATTTTTTTTATAGTTATACCAATTATAAATTGGAGGATTGGAAATTG  
ATTAATTCCTTTAATATTAGGAGCCCCAGATATAGCTTTTCTCGAATAAATAATATAAGATTTTGATTACTACCCCCCTTCATTAACCTTTATTAATT  
TCTAGAAGAATTGTG????????????????GGATGAACAGTTTATCCCCCTTTATCATCTAATATCGCTCATAGAGGTAGTTTCAGTTGATTAG  
CTATTTTTTCTTTACATTTAGCAGGAATTTTCATCAATCTTAGGGGCTATTAAATTTTATTACAACCTATTATTAATATACGAATTAACCATATATCATT  
TGATCAAATACCTCTCTTTGTATGAGCAGTAGGAATTACTGCTTTACTTTTATTATTATCTTTACCTGTATTAGCTGGTGCATTACTATATTATTA  
ACAGATCGAAATCTTAATACTTTCATTTTTTTGATCTGCGAGGAGGTGGAGATCCTATTTTATATCAA-----

## AM231425\_W333\_angorae\_Tur

ACACTATATTTTATTTTGGTATTTGAGCAGGTATAGTAGGAACCTCTTTAAGATTATTAATTCGTACTGAATTAGGTAATCCTGGATCTTTAATTG  
GGGATGATCAAATTTATAAATACTATTGTAACAGCTCATGCTTTTATTATAATTTTTTTTATAGTTATACCAATTATAAATTGGAGGATTGGAAATTG  
ATTAATTCCTTTAATATTAGGAGCCCCAGATATAGCTTTTCTCGAATAAATAATATAAGATTTTGATTATACCCCCCTTCATTAACCTTTATTAATT  
TCTAGAAGAATTGTG????????????????GGATGAACAGTTTATCCCCCTTTATCATCTAATATTTCTCATAGAGGTAGTTTCAGTTGATTAG  
CTATTTTTTCTTTACATTTAGCAGGAATTTTCATCAATCTTAGGAGCTATTAATTTTATTACAACCTATTATTAATATACGAATTAATCATATATCATT  
TGATCAAATACCCCTTTTGTATGGGCAGTAGGAATTACTGCTTTACTTTTATTATTATCTTTACCTGTATTAGCTGGTGCWTTACTATATTATTA  
ACAGATCGAAATCTTAATACTTTCATTTTTTCGATCCGCGAGGAGGTGGGGATCCTATTTTATATCAA-----

## AM231424\_W331\_angorae\_Tur Ankara

ACACTATATTTTATTTTGGTATTTGAGCAGGTATAGTAGGAACCTCTTTAAGATTATTAATTCGTACTGAATTAGGTAATCCTGGATCTTTAATTG  
GAGATGATCAAATTTATAAATACTATTGTAACAGCTCATGCTTTTATTATAATTTTTTTTATAGTTATACCAATTATAAATTGGAGGATTGGAAATTG  
ATTAATTCCTTTAATATTAGGAGCCCCAGATATAGCTTTTCTCGAATAAATAATATAAGATTTTGATTATACCCCCCTTCATTAACCTTTATTAATT  
TCTAGAAGAATTGTG????????????????GGATGAACAGTTTATCCCCCTTTATCATCTAATATCGCTCATAGAGGTAGCTCAGTTGATTAG  
CTATTTTTTCTTTACATTTAGCAGGAATTTTCATCAATCTTAGGAGCTATTAATTTTATTACAACCTATTATTAATATACGAATTAACCATATATCATT  
TGATCAAATACCTCTCTTTGTATGAGCAGTAGGAATTACTGCTTTACTTTTATTATTATCTTTACCTGTATTAGCTGGTGCATTACTATATTATTA  
ACAGATCGAAATCTTAATACTTTCATTTTTTTGATCTGCGAGGAGGTGGAGATCCTATTTTATATCAA-----

## AM231423\_W329\_gigantea\_Uzb\_Chatkal

ACACTATATTTTATTTTGGTATTTGAGCAGGTATAGTAGGAACCTCTTTAAGATTATTAATTCGTACTGAATTAGGTAATCCTGGATCTTTAATTG  
GAGATGATCAAATTTATAAATACTATTGTAACAGCTCATGCTTTTATTATAATTTTTTTTATAGTTATACCAATTATAAATTGGAGGATTGGAAATTG  
ATTAATTCCTTTAATATTAGGAGCCCCAGATATAGCTTTTCTCGAATAAATAATATAAGATTTTGATTATACCCCCCTTCATTAACCTTTATTAATT  
TCTAGAAGAATTGTG????????????????GGATGAACAGTTTATCCCCCTTTATCATCTAATATCGCTCATAGAGGTAGTTTCAGTTGATTAG  
CTATTTTTTCTTTACATTTAGCAGGAATTTTCATCAATCTTAGGAGCTATTAATTTTATTACAACCTATTATTAATATACGAATTAATCATATATCATT  
TGATCAAATACCTCTCTTTGTATGAGCAGTAGGAATTACTGCTTTACTTTTATTACTATCTTTACCTGTATTAGCTGGTGCATTACTATATTATTA  
ACAGATCGAAATCTTAATACTTTCATTTTTTTGATCTGCGAGGAGGTGGAGATCCTATTTTATATCAA-----

## AM231422\_W330\_orientalis\_Zailiyskiy

ACACTATATTTTATTTTGGTATTTGAGCAGGTATAGTAGGAACCTCTTTAAGATTATTAATTCGTACTGAATTAGGTAATCCTGGATCTTTAATTG  
GAGATGATCAAATTTATAAATACTATTGTAACAGCTCATGCTTTTATTATAATTTTTTTTATAGTTATACCAATTATAAATTGGAGGATTGGAAATTG  
ATTAATTCCTTTAATATTAGGGGCCCCAGATATAGCTTTTCTCGAATAAATAATATAAGATTTTGATTATACCCCCCTTCATTAACCTTTATTAATT  
TCTAGAAGAATTGTAGAAAAATGGAGCAGGAACAGGATGAACAGTTTATCCCCCTTTATCATCTAATATCGCTCATAGAGGTAGTTTCAGTTGATTAG  
CTATTTTTTCTTTACATTTAGCGGGAATTTTCATCAATCTTAGGAGCTATTAATTTTATTACAACCTATTATTAATATACGAATTAATCATATATCATT  
TGATCAAATACCTCTCTTTGTATGAGCAGTAGGAATTACTGCTTTACTTTTATTACTATCTTTACCTGTATTAGCTGGTGCATTACTATATTATTA  
ACAGATCGAAATCTTAATACTTTCATTTTTTTGATCTGCGAGGAGGTGGAGATCCTATTTTATATCAA-----

## AM231421\_W292\_ochracea\_Tadj\_Zeravsh\_

ACACTATATTTTATTTTGGTATTTGAGCAGGTATAGTAGGAACCTCTTTAAGATTATTAATTCGTACTGAATTAGGTAATCCTGGATCTTTAATTG  
GAGATGATCAAATTTATAAATACTATTGTAACAGCTCATGCTTTTATTATAATTTTTTTTATAGTTATACCAATTATAAATTGGAGGATTGGAAATTG  
ATTAATTCCTTTAATATTAGGAGCCCCAGATATAGCTTTTCTCGAATAAATAATATAAGATTTTGATTACTACCCCCCTTCATTAACCTTTATTAATT  
TCCAGAAGAATTGTAGAAAAATGGAGCAGGAACAGGATGAACAGTTTATCCCCCTTTATCATCTAATATCGCTCATAGAGGTAGTTTCAGTTGATTAG  
CTATTTTTTCTTTACATTTAGCAGGAATTTTCATCAATTTTAGGAGCTATTAATTTTATTACAACCTATTATTAATATACGAATTAACCATATATCATT  
TGATCAAATACCCCTCTTTGTATGAGCAGTAGGAATTACTGCTTTACTTTTATTACTATCTTTACCTGTATTAGCTGGTGCATTACTATATTATTA  
ACAGATCGAAATCTTAATACTTTCATTTTTTTGATCTGCGAGG?GTGGAGATCCTATTTTATATCAA-----

## AM231420\_W280\_farsica\_Iran\_Fars

ACACTATATTTTATTTTCGGTATTTGAGCAGGTATAGTAGGAACCTCTTTAAGATTATTAATTCGTACTGAATTAGGTAATCCTGGATCTTTAATTG  
GAGATGATCAAATTTATAAATACTATTGTAACAGCTCATGCTTTTATTATAATTTTTTTTATAGTTATACCAATTATAAATTGGAGGATTGGAAATTG  
ATTAATTCCTTTAATATTAGGAGCTCCAGATATAGCTTTCCCCCGAATAAATAATATAAGATTTTGATTACTACCCCCCTTCATTAACCTTTATTAATT  
TCTAGAAGAATTGTAGAAAAATGGAGCAGGAACAGGATGAACAGTTTACCCCCCTTTATCATCTAATATTGCCACAGAGGTAGTTTCAGTTGATTAG  
CTATTTTTTCTTTACATTTAGCAGGAATTTTCATCAATTTTAGGAGCTATTAATTTTATTACAACCTATTATTAATATACGAATTAATATATATCATT  
TGATCAAATACCTCTTTTTGTATGAGCAGTAGGAATTACGATCTTTACTTTTATTATTATCTTTACCTGTATTAGCTGGTGCATTACTATATTATTA  
ACAGATCGAAATCTTAACACTTTCATTTTTTTGATCTGCA??GTGGGATCCTATTTTATATCAA-----

AM231419\_W311\_pseudonubilosus\_Iran\_Urmia  
ACACTATATTTTATTTTCGGTATTTGAGCGGGTATAGTAGGAACCTCTTTAAGATTATTAATTCGTACTGAATTAGGTAATCCTGGATCTTTAATTG  
GAGATGATCAAATTTATAACACTATTTGTAACAGCTCATGCTTTTATTATAATTTTTTTTATAGTTATACCAATTATAAATTGGAGGATTTGGAAATTG  
ATTAATTCCTTTAATATTAGGAGCTCCAGATATAGCTTTTCTCGAATAAATAATATAAGATTTTGATTACTCCCCCCTCATTAACTTTATTAATT  
TCTAGAAGAATTGTAGAAAATGGAGCAGGAACAGGATGAACAATTTATCCCCCTTTATCATCTAATATTGCTCATAGAGGTAGTTCAGTTGATTTAG  
CTATTTTTTCTTTACATTTAGCAGGAATTTTCATCAATCTTAGGAGCTATTAATTTTATTACAACCTATTATTAACATACGAATTAATCATATATCATT  
TGATCAAATACCTCTTTTTGTATGAGCAGTAGGAATTACTGCATTACTTTTATTATATCTTTACCTGTATTAGCTGGTGCATTACTATATTATTA  
ACAGATCGAAATCTTAATACTTCATTTTTTGATCCTGCAGGA?GTGGAGATCCTATTTTATATCAA-----

AM231418\_W335\_sheljuzhkoi\_Tur\_Adana  
ACACTATATTTTATTTTGGTATTTGAGCAGGTATAGTAGGAACCTCTTTAAGATTATTAATTCGTACTGAATTAGGTAATCCTGGATCTTTAATTA  
GAGATGATCAAATTTATAACTATTTGTAACAGCTCATGCTTTTATTATAATTTTTTTTATAGTTATACCAATTATAAATTGGAGGATTTGGAAATTG  
ATTAATTCCTTTAATATTAGGAGCCCCAGATATAGCTTTTCTCGAATAAATAATATAAGATTTTGATTACTCCCCCTTCATTAACTTTATTAATT  
TCTAGAAGAATTG????????????????GGATGAACAGTTTATCCCCCTTTATCATCTAATATTGCTCATAGAGGTAGTTCAGTTGATTTAG  
CTATTTTTTCTTTACATTTAGCAGGAATTTTCATCAATCTTAGGAGCTATTAATTTTATTACAACCTATTATTAATATACGAATTAATAATATATCATT  
TGATCAAATACCTCTTTTTGTATGAGCAGTAGGAATTACTGCATTACTTTTATTATTATCCTTACCTGTATTAGCTGGTGCATTACTATATTATTA  
ACAGATCGAAATCTTAATACTTCATTTTTTGATCCCGCAGGAGGTGGAGATCCTATTTTATATCAA-----

AM231417\_W78\_parmenides\_Fr  
ACATTATATTTTATTTTGGTATTTGAGCAGGTATAGTAGGAACCTCTTTAAGATTATTAATTCGTACTGAATTAGGTAATCCTGGATCTTTAATTG  
GAGATGATCAAATTTATAACTATTTGTAACAGCTCATGCTTTTATTATAAATTTTTTTTATAGTTATACCAATTATAAATTGGAGGATTTGGAAATTG  
ATTAATTCCTTTAATATTAGGAGCCCCAGATATAGCTTTCCCCCGAATAAATAATATAAGATTTTGATTACTACCCCTTCATTAACTTTATTAATT  
TCTAGAAGAATTGTAGAAAATGGAGCAGGAACCTGGATGAACAGTTTACCCCCCTTTATCATCTAATATTGCTCATAGAGGAAGTTCAGTTGATTTAG  
CTATTTTTTCTTTACATTTAGCAGGAATTTTCATCAATCTTAGGAGCTATTAATTTTATTACAACCTATTATTAATATACGAATTAATCATATATCATT  
CGATCAAATACCTCTTTTTGTATGAGCAGTAGGAATTACTGCTTACTCTTATTATTATCATTTACCTGTATTAGCTGGTGCATTACTATATTATTA  
ACAGATCGAAATCTTAATACTTCATTTTTTGATCCAGCAGGGGTGGTGATCCTATTTTATATCAA-----

EU836682\_h\_1\_32\_Rus  
-----  
-----  
GCTTTTCCTCGAATAAATAATATAAGATTTTGATTACTACCCCTCATTAACCTTTATTAATTTCTAGAAGAATTGTAGAAAATGGAGCAGGAACAG  
GATGAACAGTTTATCCCCCTTATCATCTAATATCGCTCATAGAGGTAGTTCAGTTGATTTAGCTATTTTTCTTTACATTTAGCAGGAATTTTCATC  
AATCTTAGGAGCTATTAATTTTATTACAACCTATTATTAATATACGAATTAACCATATATCATTGATCAAATACCTCTCTTTGTATGAGCAGTAGGA  
ATTACTGCTTTACTTTTATTATTATCTTTACCTGTATTAGCTGGTGCATTACTATATTATTAACAGATCGAAATCTTAATACTTCATTTTTTGATC  
CTGCAGGAGGTGGGATCCTATTTTATATCAACATTTA

EU836681\_h\_1\_31\_Rus  
-----  
-----  
GCTTTTCCTCGAATAAATAATATAAGATTTTGATTACTACCCCTCATTAACCTTTATTAATTTCTAGAAGAATTGTAGAAAATGGAGCAGGAACAG  
GATGAACAATTTATCCCCCTTATCATCTAATATCGCTCATAGAGGTAGTTCAGTTGATTTAGCTATTTTTCTTTACATTTAGCAGGAATTTTCATC  
AATCTTAGGAGCTATTAATTTTATTACAACCTATTATTAATATACGAATTAACCATATATCATTGATCAAATACCTCTCTTTGTATGAGCAGTAGGA  
ATTACTGCTTTACTTTTATTATTATCTTTACCTGTATTAGCTGGTGCATTACTATATTATTAACAGATCGAAATCTTAATACTTCATTTTTTGATC  
CTGCAGGAGGTGGGATCCTATTTTATATCAACATTTA

EU836680\_A\_Bo\_Bu\_Cr\_Cz\_Hu\_Sl\_Li\_Fi\_Po\_Ru  
-----  
-----  
GCTTTTCCTCGAATAAATAATATAAGATTTTGATTACTACCCCTCATTAACCTTTATTAATTTCTAGAAGAATTGTAGAAAATGGAGCAGGAACAG  
GATGAACAGTTTATCCCCCTTATCATCTAATATCGCTCATAGAGGTAGTTCAGTTGATTTAGCTATTTTTCTTTACATTTAGCAGGAATTTTCATC  
AATCTTAGGAGCTATTAATTTTATTACAACCTATTATTAATATACGAATTAACCATATATCATTGATCAAATACCTCTCTTTGTATGAGCAGTAGGA  
ATTACTGCTTTACTTTTATTATTATCTTTACCTGTATTAGCTGGTGCATTACTATATTATTAACAGATCGAAATCTTAATACTTCATTTTTTGATC  
CTGCAGGAGGTGGAGATCCTATTTTATATCAACATTTA

EU836675\_h\_1\_19\_It  
-----  
-----  
GCTTTCCCTCGAATAAATAATATAAGATTTTGATTACTACCCCTCATTAACCTTTATTAATTTCTAGAAGAATTGTAGAAAATGGAGCAGGAACAG  
GATGAACAGTTTATCCCCCTTATCATCTAATATTGCTCATAGAGGTAGTTCAGTTGATTTAGCTATTTTTCTTTACATTTAGCAGGAATTTTCATC  
AATCTTAGGAGCTATTAATTTTATTACAACCTATTATTAATATACGAATTAACCATATATCATTGATCAAATACCTCTCTTTGTATGAGCAGTAGGA  
ATTACTGCTTTACTTTTATTATTATCTTTACCTGTATTAGCTGGTGCATTACTATATTATTAACAGATCGAAATCTTAATACTTCATTTTTTGATC  
CTGCAGGAGGTGGAGATCCTATTTTATATCAACATTTA

EU836674\_h\_1\_18\_At\_It  
-----  
-----  
GCTTTTCCTCGAATAAATAATATAAGATTTTGATTACTACCCCTCATTAACCTTTATTAATTTCTAGAAGAATTGTAGAAAATGGAGCAGGAACAG  
GATGAACAGTTTATCCCCCTTATCATCTAATATTGCTCATAGAGGTAGTTCAGTTGATTTAGCTATTTTTCTTTACATTTAGCAGGAATTTTCATC  
AATCTTAGGAGCTATTAATTTTATTACAACCTATTATTAATATACGAATTAACCATATATCATTGATCAAATACCTCTCTTTGTATGAGCAGTAGGA  
ATTACTGCTTTACTTTTATTATTATCTTTACCTGTATTAGCTGGTGCATTACTATATTATTAACAGATCGAAATCTTAATACTTCATTTTTTGATC  
CTGCAGGAGGTGGAGATCCTATTTTATATCAACATTTA

EU836672\_h\_1\_10\_It  
-----  
-----  
GCTTTCCCTCGAATAAATAATATAAGATTTTGATTACTACCCCTCATTAACCTTTATTAATTTCTAGAAGAATTGTAGAAAATGGGAGCAGGAACAG  
GATGAACAGTTTATCCCCCTTATCATCTAATATCGCTCATAGAGGTAGTTCAGTTGATTTAGCTATTTTTCTTTACATTTAGCAGGAATTTTCATC  
AATCTTAGGAGCTATTAATTTTATTACAACCTATTATTAATATACGAATTAACCATATATCATTGATCAAATACCTCTCTTTGTATGAGCAGTAGGA



AATCTTAGGAGCTATTAATTTTATTACAACACTATTATTAATATACGAATTAACCATATATCATTGATCAAATACCTCTCTTTGTATGAGCAGTAGGA  
ATTACTGCTTTACTTTTATTATTATCTTTACCTGTATTAGCTGGTGCTATTACTATATTATTAACAGATCGAAATCTTAATACTTCATTTTTTGATC  
CTGCAGGAGGTGGAGATCCTATTTTATATCAACATTTA;

```
END;
begin mrbayes;
  set autoclose=yes nowarn=yes;
  partition ancstates = 2: 1, 2-655;
  set partition=ancstates;
  lset applyto=(2) rates=invgamma nst=6;
  unlink statefreq=(all) revmat=(all) shape=(all) pinvar=(all);
  prset ratepr=variable;
  constraint stubbendorfii_clade= Parnassius_stubbendorfii_2005_LOWA_815
Parnassius_stubbendorfii_2005_LOWA_154 Parnassius_stubbendorfii_2005_LOWA_153
Parnassius_glacialis_mikado Parnassius_stubbendorfii_hoenei
Parnassius_stubbendorfii_hoenei_AC20_16 Parnassius_stubbendorfii_koreanus;
  prset topologypr=constraints(stubbendorfii_clade);
  report applyto=(1) ancstates=yes;
  mcmc ngen= 100000 relburnin=yes burninfrac=0.25 printfreq=100 samplefreq=100 nchains=4
savebrlens=yes;
  mcmc;
  sump;
end;
```
